# Supplementary material for: Cascade bio-hydroxylation and dehalogenation for one-pot enantioselective synthesis of optically active β-halohydrins from halohydrocarbons
Source: Royal Society of Chemistry journal article supplement (doi:10.1039/c9gc01802f), 2019-01-01
Supplement: c9gc01802f1.pdf [file c9gc01802f1.pdf]

## Supporting Information

# Cascade bio-hydroxylation and dehalogenation for one-pot enantioselective synthesis of optically active $\beta$ -halohydrins from haloalkanes

### Authors:

Hai-Bo Cui,<sup>a,†</sup> Ling-Zhi Xie,<sup>a,†</sup> Nan-Wei Wan,<sup>a</sup> Qing He,<sup>a</sup> Zhi Li,<sup>b</sup> and Yong-Zheng Chen<sup>\*,a</sup>

### Affiliations:

<sup>a</sup> Key Laboratory of Biocatalysis & Chiral Drug Synthesis of Guizhou Province, Generic Drug Research Center of Guizhou Province, Green Pharmaceuticals Engineering Research Center of Guizhou Province, School of Pharmacy, Zunyi Medical University, Zunyi, 563000, China.

<sup>b</sup> Department of Chemical and Biomolecular Engineering, National University of Singapore, 4 Engineering Drive 4, Singapore 117585, Singapore

<sup>†</sup> These authors contributed equally to this work.

### \*Corresponding author:

Dr. Prof. Yong-Zheng Chen, E-mail: yzchen@zmu.edu.cn

## Table of Contents

|                                                                                                                                 |    |
|---------------------------------------------------------------------------------------------------------------------------------|----|
| 1. General experimental information .....                                                                                       | 1  |
| 2. Strains culture and enzymes preparation.....                                                                                 | 1  |
| 3. Synthesis of halohydrocarbons <b>1b-1f</b> , <b>1h-1m</b> .....                                                              | 1  |
| 4. Synthesis of $\beta$ -haloalcohols <b>2b-2m</b> .....                                                                        | 4  |
| 5. Biotransformation of <b>1a-1m</b> using <i>E. coli</i> (P450 <sub>PL2-4</sub> ).....                                         | 7  |
| 6. Cascade biotransformation of <b>1a-1m</b> using <i>E. coli</i> (P450 <sub>PL2-4</sub> ) and cell-free extract (HheA10) ..... | 7  |
| 7. Table S1.....                                                                                                                | 8  |
| 8. Table S2.....                                                                                                                | 9  |
| 9. Table S3-S5.....                                                                                                             | 10 |
| 10. Table S6.....                                                                                                               | 12 |
| 11. Reference.....                                                                                                              | 12 |
| 12. HPLC spectra for <b>2a</b> , <b>2c-2g</b> , and <b>2i-2m</b> .....                                                          | 13 |
| 13. <sup>1</sup> H NMR spectra for the synthesized <b>1b-1f</b> , <b>1h-1m</b> .....                                            | 24 |
| 14. <sup>1</sup> H and <sup>13</sup> C NMR spectra for the synthesized <b>2b-2m</b> .....                                       | 35 |

## 1. General experimental information

Column chromatography was performed on silica gel (200-400 mesh).  $^1\text{H}$  NMR (400 MHz) chemical shifts were reported in ppm ( $\delta$ ) relative to tetramethylsilane (TMS) with the solvent resonance employed as the internal standard. Data were reported as follows: chemical shift, multiplicity (s = singlet, br s = broad singlet, d = doublet, t = triplet, dd = doublet of doublets, dt = double of triplet, td = triplet of doublets, m = multiplet), coupling constants (Hz) and integration.  $^{13}\text{C}$  NMR (100 MHz) chemical shifts were reported in ppm ( $\delta$ ) from tetramethylsilane (TMS) with the solvent resonance as the internal standard.

Enantiomeric excess was determined by chiral HPLC analysis which was performed on SPD-M20A equipped with Chiralcel OJ-H chiral column (4.6 mm $\Phi$ ×250 mmL), Chiralcel OD-H chiral column (4.6 mm $\Phi$ ×250 mmL) or Chiralpak AD-H chiral column (4.6 mm $\Phi$ ×250 mmL) purchased from Daicel Chemical Industries.

Isopropyl- $\beta$ -D-thiogalactopyranoside (IPTG, >99%), ampicillin, streptomycin sulfate salt (98%), kanamycin sulfate (>99%) salt were purchased from Solarbio (Beijing, China). Chemicals (2-chloroethyl)benzene (**1a**), (2-bromoethyl)benzene (**1g**), 2-chloro-1-phenylethan-1-ol (**2a**) and (*R*)-**2a** were purchased from J&K Chemical (Shanghai, China). All the other biological and chemical reagents and solvents were obtained from commercial suppliers and used without further purification. Water was distilled before use.

## 2. Strains culture and enzymes preparation

The P450 and HheA10 enzymes were expressed in *E. coli* BL21 (DE3). The corresponding antibiotics were used in whole culture process to the final concentration: ampicillin (100  $\mu\text{g}/\text{mL}$ ), kanamycin (50  $\mu\text{g}/\text{mL}$ ) and streptomycin (50  $\mu\text{g}/\text{mL}$ ). A single colony of each *E. coli* BL21 strain was taken from the agar plate and it was inoculated in Luria-Bertani medium and grown overnight at 37 °C, 200 rpm, for 16 h. Then, a large flask (1000 mL) containing 100 mL LB was inoculated with 5 mL of the overnight culture. The flask culture was grown overnight at 37 °C, 200 rpm, until the OD<sub>600</sub> up to 0.6-0.8. Then, culture was induced with IPTG (final concentration 0.1 mM) and further shaken at 200 rpm, at 28 °C, for 12-14 h. The cultures were centrifuged and harvested to obtain *E. coli* cells. The cell-free extract of HheA10 was prepared by ultrasonication of the cells suspension (30 g cdw/L) and centrifugal separation.

## 3. Synthesis of halohydrocarbons 1b-1f, 1h-1m

The halohydrocarbon substrates **1b-1f** and **1h-1m** were synthesized from the corresponding phenethyl alcohol derivatives. The procedure described by Pluemanupat *et al.* for chlorohydrocarbon compounds was used.<sup>1</sup> In a typical experiment, a 50 mL Schlenk tube was thoroughly flame-dried and put under an atmosphere of N<sub>2</sub>, after which the following compounds were added, respectively: alcohol (1 mmol), PPh<sub>3</sub> (2 mmol), dry CH<sub>2</sub>Cl<sub>2</sub> (2 mL), and Cl<sub>3</sub>C CONH<sub>2</sub> (2 mmol). The mixture was stirred at room temperature (30 °C) under an N<sub>2</sub> atmosphere for 1 h. The reaction was quenched with cold water and the product was isolated by purification through silica gel column chromatography.

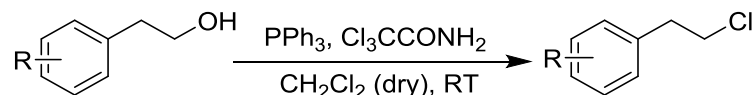

The procedure described by Han *et al.* for bromohydrocarbon compounds was used.<sup>2</sup> Alcohol (2 mmol) and CBr<sub>4</sub> (2.2 mmol) was dissolved in CH<sub>2</sub>Cl<sub>2</sub> (2 mL). After cooled to 0 °C, PPh<sub>3</sub> (2.2 mmol) was added in portions to the mixture, then was stirred overnight at room temperature. The solvent was removed under reduced pressure and the residue was added 5 mL of petroleum ether. The precipitated white solid was filtered and washed with 20 mL of petroleum ether. The filtrate was concentrated under reduced pressure, and purified by column chromatography.

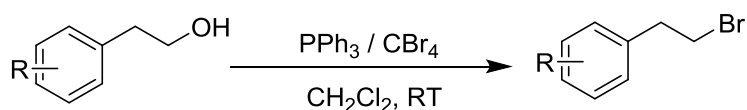

### 1-(2-chloroethyl)-2-methylbenzene (1b)

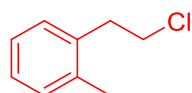

<sup>1</sup>H NMR (400 MHz, CDCl<sub>3</sub>) δ 7.20 (s, 4 H), 3.71 (t, *J* = 7.8 Hz, 2 H), 3.12 (t, *J* = 7.8 Hz, 2 H), 2.38 (s, 3 H).

### 1-(2-chloroethyl)-3-methylbenzene (1c)

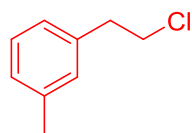

<sup>1</sup>H NMR (400 MHz, CDCl<sub>3</sub>) δ 7.23 (d, *J* = 7.5 Hz, 1 H), 7.14–7.01 (m, 3 H), 3.73 (dd, *J*<sub>1</sub> = 7.8, *J*<sub>2</sub> = 7.3 Hz, 2 H), 3.06 (t, *J* = 7.5 Hz, 2 H), 2.37 (s, 3 H).

### 1-(2-chloroethyl)-4-methylbenzene (1d)

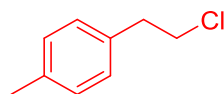

<sup>1</sup>H NMR (400 MHz, CDCl<sub>3</sub>) δ 7.23–7.13 (m, 4 H), 3.60 (td, *J*<sub>1</sub> = 7.8, *J*<sub>2</sub> = 2.7 Hz, 2 H), 3.19 (dd, *J*<sub>1</sub> = 10.5, *J*<sub>2</sub> = 4.8 Hz, 2 H), 2.40 (s, 3 H).

### 1-(2-chloroethyl)-4-fluorobenzene (1e)

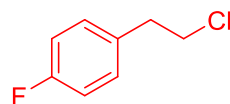

<sup>1</sup>H NMR (400 MHz, CDCl<sub>3</sub>) δ 7.24 – 7.14 (m, 2 H), 7.01 (m, 2 H), 3.70 (m, 2 H), 3.04 (t, *J* = 7.1 Hz, 2 H).

### 1-bromo-3-(2-chloroethyl)benzene (1f)

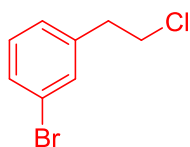

$^1\text{H NMR}$  (400 MHz,  $\text{CDCl}_3$ )  $\delta$  7.40 (m, 2 H), 7.23–7.13 (m, 2 H), 3.71 (t,  $J = 7.2$  Hz, 2 H), 3.04 (t,  $J = 7.2$  Hz, 2 H).

#### 1-(2-bromoethyl)-2-methylbenzene (1h)

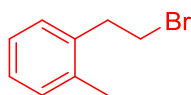

$^1\text{H NMR}$  (400 MHz,  $\text{CDCl}_3$ )  $\delta$  7.19 (s, 4 H), 3.54 (t,  $J = 8.0$  Hz, 2 H), 3.20 (t,  $J = 8.0$  Hz, 2 H), 2.36 (s, 3 H).

#### 1-(2-bromoethyl)-3-methylbenzene (1i)

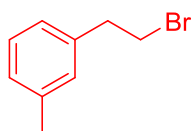

$^1\text{H NMR}$  (400 MHz,  $\text{CDCl}_3$ )  $\delta$  7.23 (t,  $J = 7.5$  Hz, 1 H), 7.10 (d,  $J = 7.5$  Hz, 1 H), 7.03 (d,  $J = 8.6$  Hz, 2 H), 3.58 (t,  $J = 7.7$  Hz, 2 H), 3.15 (t,  $J = 7.7$  Hz, 2 H), 2.37 (s, 3 H).

#### 1-(2-bromoethyl)-4-methylbenzene (1j)

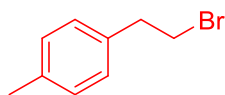

$^1\text{H NMR}$  (400 MHz,  $\text{CDCl}_3$ )  $\delta$  7.23–7.07 (m, 4 H), 3.72 (t,  $J = 7.5$  Hz, 2 H), 3.06 (t,  $J = 7.5$  Hz, 2 H), 2.36 (s, 3 H).

#### 1-(2-bromoethyl)-4-fluorobenzene (1k)

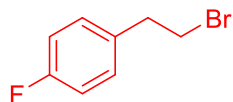

$^1\text{H NMR}$  (400 MHz,  $\text{DMSO-}d_6$ )  $\delta$  7.32 – 7.26 (m, 2 H), 7.10 (t,  $J = 8.9$  Hz, 2 H), 3.67 (t,  $J = 7.2$  Hz, 2 H), 3.09 (t,  $J = 7.2$  Hz, 2 H).

#### 1-(2-bromoethyl)-4-chlorobenzene (1l)

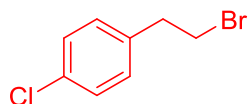

$^1\text{H NMR}$  (400 MHz,  $\text{DMSO-}d_6$ )  $\delta$  7.33 (m, 4 H), 3.71 (td,  $J_1 = 7.0$ ,  $J_2 = 2.3$  Hz, 2 H), 3.11 (t,  $J = 7.0$  Hz, 2 H).

#### 1-bromo-3-(2-bromoethyl)benzene (1m)

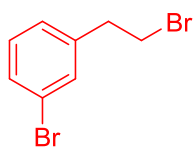

$^1\text{H NMR}$  (400 MHz,  $\text{CDCl}_3$ )  $\delta$  7.39 (m, 2 H), 7.23–7.13 (m, 2 H), 3.55 (t,  $J = 7.4$  Hz, 2 H), 3.13 (t,  $J = 7.4$  Hz, 2 H).

#### 4. Synthesis of $\beta$ -haloalcohols 2b-2m

The  $\beta$ -haloalcohols were prepared from the corresponding olefins following the procedure described in our previous paper.<sup>3</sup> Chloroalcohols were synthesized and purified according to the method reported by Swamy,<sup>4</sup> and bromoalcohols were synthesized and purified according to the revised method reported by Hatton.<sup>5</sup>

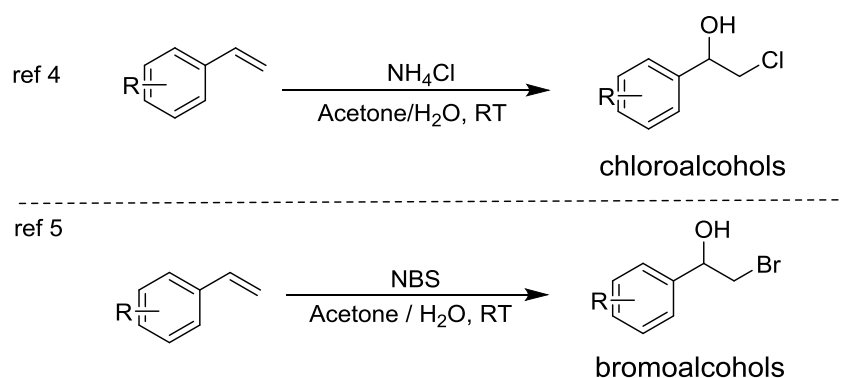

#### 2-chloro-1-(o-tolyl)ethan-1-ol (2b)

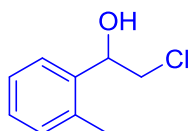

$^1\text{H NMR}$  (400 MHz,  $\text{CDCl}_3$ )  $\delta$  7.52–7.48 (m, 1 H), 7.25–7.19 (m, 2 H), 7.16 (d,  $J = 6.5$  Hz, 1 H), 5.09 (dd,  $J_1 = 9.0$ ,  $J_2 = 3.0$  Hz, 1 H), 3.68 (dd,  $J_1 = 11.3$ ,  $J_2 = 3.1$  Hz, 1 H), 3.58 (dd,  $J_1 = 11.1$ ,  $J_2 = 9.3$  Hz, 1 H), 2.63 (s, 1 H), 2.34 (s, 3 H);  $^{13}\text{C NMR}$  (100 MHz,  $\text{CDCl}_3$ )  $\delta$  137.2 (s), 136.2 (s), 130.6 (s), 129.4 (s), 127.2 (s), 126.3 (s), 37.1 (s), 31.8 (s), 19.4 (s).

#### 2-chloro-1-(m-tolyl)ethan-1-ol (2c)

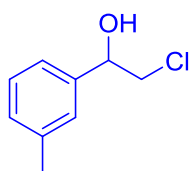

$^1\text{H NMR}$  (400 MHz,  $\text{CDCl}_3$ )  $\delta$  7.26 (t,  $J = 7.5$  Hz, 1 H), 7.16 (dd,  $J_1 = 17.6$ ,  $J_2 = 8.9$  Hz, 3 H), 4.84 (dd,  $J_1 = 8.8$ ,  $J_2 = 3.3$  Hz, 1 H), 3.72 (dd,  $J_1 = 11.2$ ,  $J_2 = 3.4$  Hz, 1 H), 3.63 (dd,  $J_1 = 11.2$ ,  $J_2 = 8.8$  Hz, 1 H), 2.66 (s, 1H), 2.36 (s, 3 H);  $^{13}\text{C NMR}$  (100 MHz,  $\text{CDCl}_3$ )  $\delta$  134.0 (s), 138.5 (s), 129.3 (s), 128.6 (s), 126.8 (s), 123.2 (s), 74.2 (s), 51.0 (s), 21.5 (s).

### 2-chloro-1-(p-tolyl)ethan-1-ol (2d)

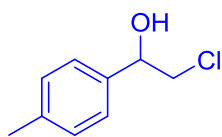

$^1\text{H}$  NMR (400 MHz,  $\text{CDCl}_3$ )  $\delta$  7.27 (d,  $J = 7.9$  Hz, 2 H), 7.18 (d,  $J = 7.7$  Hz, 2 H), 4.86 (dd,  $J_1 = 8.5$ ,  $J_2 = 3.0$  Hz, 1 H), 3.78–3.68 (m, 1 H), 3.68–3.58 (m, 1 H), 2.51 (s, 1H), 2.36 (s, 3 H);  $^{13}\text{C}$  NMR (100 MHz,  $\text{CDCl}_3$ )  $\delta$  138.4 (s), 137.1 (s), 129.4 (s), 126.1 (s), 74.0 (s), 51.0 (s), 21.3 (s).

### 2-chloro-1-(4-fluorophenyl)ethan-1-ol (2e)

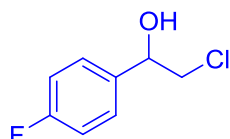

$^1\text{H}$  NMR (400 MHz,  $\text{CDCl}_3$ )  $\delta$  7.40–7.33 (m, 2 H), 7.07 (dd,  $J_1 = 12.0$ ,  $J_2 = 5.2$  Hz, 2 H), 4.89 (dd,  $J_1 = 8.7$ ,  $J_2 = 3.4$  Hz, 1 H), 3.71 (dd,  $J_1 = 11.2$ ,  $J_2 = 3.5$  Hz, 1 H), 3.65–3.57 (m, 1 H), 2.73 (s, 1 H);  $^{13}\text{C}$  NMR (100 MHz,  $\text{CDCl}_3$ )  $\delta$  162.4 (d,  $J = 245.0$  Hz), 135.9 (d,  $J = 3.0$  Hz), 127.8 (d,  $J = 8.0$  Hz), 115.3 (d,  $J = 21.0$  Hz), 73.3 (s), 50.2 (s).

### 1-(3-bromophenyl)-2-chloroethan-1-ol (2f)

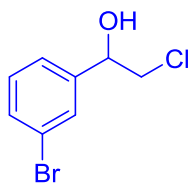

$^1\text{H}$  NMR (400 MHz,  $\text{CDCl}_3$ )  $\delta$  7.54 (s, 1 H), 7.44 (dd,  $J_1 = 7.8$ ,  $J_2 = 1.1$  Hz, 1 H), 7.29 (d,  $J = 7.7$  Hz, 1 H), 7.23 (t,  $J = 7.6$  Hz, 1 H), 4.85 (dd,  $J_1 = 8.6$ ,  $J_2 = 2.9$  Hz, 1 H), 3.75–3.67 (m, 1 H), 3.64–3.55 (m, 1 H), 2.76 (s, 1 H);  $^{13}\text{C}$  NMR (100 MHz,  $\text{CDCl}_3$ )  $\delta$  142.2 (s), 131.6 (s), 130.3 (s), 129.3 (s), 124.8 (s), 122.9 (s), 73.4 (s), 50.8 (s).

### 2-bromo-1-phenylethan-1-ol (2g)

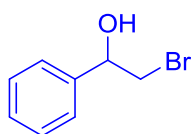

$^1\text{H}$  NMR (400 MHz,  $\text{CDCl}_3$ )  $\delta$  7.41–7.30 (m, 5 H), 4.92 (dd,  $J_1 = 8.9$ ,  $J_2 = 3.4$  Hz, 1 H), 3.64 (dd,  $J_1 = 10.5$ ,  $J_2 = 3.4$  Hz, 1 H), 3.54 (dd,  $J_1 = 10.4$ ,  $J_2 = 8.9$  Hz, 1 H), 2.59 (s, 1 H);  $^{13}\text{C}$  NMR (100 MHz,  $\text{CDCl}_3$ )  $\delta$  140.4 (s), 128.8 (s), 128.5 (s), 126.1 (s), 73.9 (s), 40.2 (s).

### 2-bromo-1-(o-tolyl)ethan-1-ol (2h)

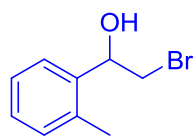

$^1\text{H NMR}$  (400 MHz,  $\text{CDCl}_3$ )  $\delta$  7.50 (d,  $J = 6.8$  Hz, 1 H), 7.29–7.18 (m, 2 H), 7.15 (d,  $J = 6.8$  Hz, 1 H), 5.12 (dd,  $J_1 = 9.3$ ,  $J_2 = 2.5$  Hz, 1 H), 3.57 (dd,  $J_1 = 10.6$ ,  $J_2 = 2.8$  Hz, 1 H), 3.47 (t,  $J = 10.0$  Hz, 1 H), 2.42 (s, 1 H), 2.34 (s, 3 H);  $^{13}\text{C NMR}$  (100 MHz,  $\text{CDCl}_3$ )  $\delta$  138.4 (s), 134.8 (s), 130.7 (s), 128.3 (s), 126.6 (s), 125.5 (s), 70.8 (s), 39.2 (s), 19.2(s).

### 2-bromo-1-(m-tolyl)ethan-1-ol (2i)

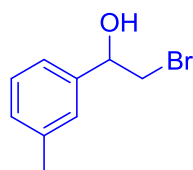

$^1\text{H NMR}$  (400 MHz,  $\text{CDCl}_3$ )  $\delta$  7.26 (t,  $J = 7.4$  Hz, 1 H), 7.16 (dd,  $J_1 = 15.3$ ,  $J_2 = 8.2$  Hz, 3 H), 4.86 (dd,  $J_1 = 8.9$ ,  $J_2 = 3.0$  Hz, 1 H), 3.61 (dd,  $J_1 = 10.4$ ,  $J_2 = 3.2$  Hz, 1 H), 3.52 (t,  $J = 9.7$  Hz, 1H), 2.66 (s, 1 H), 2.36 (s, 3 H);  $^{13}\text{C NMR}$  (100 MHz,  $\text{CDCl}_3$ )  $\delta$  140.3 (s), 138.5 (s), 129.3 (s), 128.6 (s), 126.7 (s), 123.1 (s), 73.9 (s), 40.2 (s), 21.5 (s).

### 2-bromo-1-(p-tolyl)ethan-1-ol (2j)

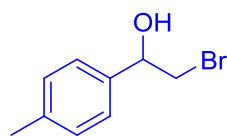

$^1\text{H NMR}$  (400 MHz,  $\text{CDCl}_3$ )  $\delta$  7.32 (d,  $J = 8.0$  Hz, 2 H), 7.25 (d,  $J = 8.0$  Hz, 2 H), 4.93 (dd,  $J_1 = 8.7$ ,  $J_2 = 3.5$  Hz, 1 H), 3.62 (ddd,  $J_1 = 19.2$ ,  $J_2 = 10.4$ ,  $J_3 = 6.3$  Hz, 2 H), 2.82 (s, 1H), 2.42 (s, 3 H);  $^{13}\text{C NMR}$  (100 MHz,  $\text{CDCl}_3$ )  $\delta$  138.2 (s), 137.5 (s), 129.3 (s), 126.0 (s), 73.7 (s), 40.1 (s), 21.2 (s).

### 2-bromo-1-(4-fluorophenyl)ethan-1-ol (2k)

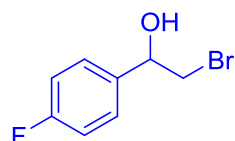

$^1\text{H NMR}$  (400 MHz,  $\text{CDCl}_3$ )  $\delta$  7.38–7.30 (m, 2H), 7.0–7.00 (m, 2H), 4.92–4.84 (m, 1H), 3.58 (m, 1H), 3.54–3.46 (m, 1 H), 2.79 (s, 1 H);  $^{13}\text{C NMR}$  (100 MHz,  $\text{CDCl}_3$ )  $\delta$  162.3 (d,  $J = 245.0$  Hz), 136.3 (d,  $J = 3.0$  Hz), 127.7 (d,  $J = 8.0$  Hz), 115.3 (d,  $J = 22.0$  Hz), 72.9 (s), 39.2 (s).

### 2-bromo-1-(4-chlorophenyl)ethan-1-ol (2l)

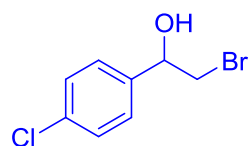

$^1\text{H NMR}$  (400 MHz,  $\text{CDCl}_3$ )  $\delta$  7.37–7.27 (m, 4 H), 4.87 (dd,  $J_1 =$



8.6,  $J_2 = 3.4$  Hz, 1H), 3.58 (m, 1H), 3.54 – 3.44 (m, 1 H), 2.84 (s, 1H);  $^{13}\text{C}$  NMR (100 MHz,  $\text{CDCl}_3$ )  $\delta$  138.8 (s), 134.2 (s), 128.9 (s), 127.4 (s), 73.2 (s), 39.9 (s).

### 2-bromo-1-(3-bromophenyl)ethan-1-ol (2m)

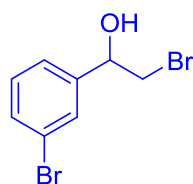

$^1\text{H}$  NMR (400 MHz,  $\text{CDCl}_3$ )  $\delta$  7.53 (s, 1H), 7.44–7.39 (m, 1 H), 7.24 (m, 2 H), 4.86 (d,  $J = 8.8$  Hz, 1H), 3.59 (ddd,  $J_1 = 10.5$ ,  $J_2 = 3.3$ ,  $J_3 = 1.1$  Hz, 1 H), 3.50–3.43 (m, 1 H), 2.72 (d,  $J = 2.4$  Hz, 1 H);  $^{13}\text{C}$  NMR (101 MHz,  $\text{CDCl}_3$ )  $\delta$  142.5 (s), 131.2 (s), 130.1 (s), 128.9 (s), 124.6 (s), 122.5 (s), 72.8 (s), 39.1 (s).

### 5. Biotransformation of 1a-1m using *E. coli* (P450<sub>PL2-4</sub>)

To a 25 mL shake flask, 5 mL PBS buffer (50 mM, pH 8.5) containing 30 g cdw/L of *E. coli* (P450<sub>PL2-4</sub>) cells was added. Subsequently, 15-25  $\mu\text{L}$  of substrate **1** stock solution was added to a final concentration of 2 mM. The mixture was stirred at 35 °C, 200 rpm. After reaction for 12 h, the mixture was centrifuged at 8,000 g for 5 min. 3 mL supernatant was taken and extracted with 3 mL ethyl acetate. The organic phase was separated, dried on anhydrous  $\text{NaSO}_4$ , and analyzed by chiral HPLC.

### 6. Cascade biotransformation of 1a-1m using *E. coli* (P450<sub>PL2-4</sub>) and cell-free extract (HheA10)

To a 25 mL shake flask, 5 mL PBS buffer (50 mM, pH 8.5) containing 30 g cdw/L of *E. coli* (P450<sub>PL2-4</sub>) cells was added. Subsequently, 15-25  $\mu\text{L}$  ethanol stock solution of substrate **1** was added to a final concentration of 2 mM. The mixture was stirred at 35 °C, 200 rpm. After reaction for 8 h, 2 mL cell-free extract of HheA10 enzyme was added to the mixture. The mixture continued to react for 4 h (for chlorohydrocarbon substrates) or 1 h (for bromohydrocarbon substrates). Then, the mixture was centrifuged at 8,000 g for 5 min. 3 mL supernatant was taken and extracted with 3 mL ethyl acetate. The organic phase was separated, dried on anhydrous  $\text{NaSO}_4$ , and analyzed by chiral HPLC.

**Table S1.** Information for the recombinant *E. coli* strains.

| Recombinant strain                      | P450, Fdx-Fdr                                                         |
|-----------------------------------------|-----------------------------------------------------------------------|
| <i>E. coli</i> (P450 <sub>PL2</sub> -1) | pET28-P450 <sub>PL2</sub> ; pCDFDuet-Fdx1-Fdr                         |
| <i>E. coli</i> (P450 <sub>PL2</sub> -2) | pET28-P450 <sub>PL2</sub> ; pCDFDuet-Fdx2-Fdr                         |
| <i>E. coli</i> (P450 <sub>PL2</sub> -3) | pET28-P450 <sub>PL2</sub> ; pCDFDuet-Fdx3-Fdr                         |
| <i>E. coli</i> (P450 <sub>PL2</sub> -4) | pET28-P450 <sub>PL2</sub> ; pCDFDuet-Fdx4-Fdr                         |
| <i>E. coli</i> (P450 <sub>PL2</sub> -5) | pET28-P450 <sub>PL2</sub> ; pCDFDuet-Fdx5-Fdr                         |
| <i>E. coli</i> (P450 <sub>PL7</sub> -1) | pET28-P450 <sub>PL7</sub> ; pCDFDuet-Fdx1-Fdr                         |
| <i>E. coli</i> (P450 <sub>PL7</sub> -2) | pET28-P450 <sub>PL7</sub> ; pCDFDuet-Fdx2-Fdr                         |
| <i>E. coli</i> (P450 <sub>PL7</sub> -3) | pET28-P450 <sub>PL7</sub> ; pCDFDuet-Fdx3-Fdr                         |
| <i>E. coli</i> (P450 <sub>PL7</sub> -4) | pET28-P450 <sub>PL7</sub> ; pCDFDuet-Fdx4-Fdr                         |
| <i>E. coli</i> (P450 <sub>PL7</sub> -5) | pET28-P450 <sub>PL7</sub> ; pCDFDuet-Fdx5-Fdr                         |
| <i>E. coli</i> (P450pyrM1)              | pRSFDuet-P450pyr(N100S); pETDuet-Fdx-Fdr                              |
| <i>E. coli</i> (P450pyrM2)              | pRSFDuet-P450pyr(N100S/F403I); pETDuet-Fdx-Fdr                        |
| <i>E. coli</i> (P450pyrM3)              | pRSFDuet-P450pyr(N100S/F403M); pETDuet-Fdx-Fdr                        |
| <i>E. coli</i> (P450pyrM4)              | pRSFDuet-P450pyr(N100S/T186I/M305Q); pETDuet-Fdx-Fdr                  |
| <i>E. coli</i> (P450pyrM5)              | pRSFDuet-P450pyr(N100S/F403I/L302V); pETDuet-Fdx-Fdr                  |
| <i>E. coli</i> (P450pyrM6)              | pRSFDuet-P450pyr(N100S/F403I/T186I/D183E); pETDuet-Fdx-Fdr            |
| <i>E. coli</i> (P450pyrM7)              | pRSFDuet-P450pyr(N100S/F403I/T186I/L302V/I83F); pETDuet-Fdx-Fdr       |
| <i>E. coli</i> (P450pyrM8)              | pRSFDuet-P450pyr(N100S/F403I/T186I/L302V/M305Q); pETDuet-Fdx-Fdr      |
| <i>E. coli</i> (P450pyrM9)              | pRSFDuet-P450pyr(N100S/F403I/T186I/L302V/T259A); pETDuet-Fdx-Fdr      |
| <i>E. coli</i> (P450pyrM10)             | pRSFDuet-P450pyr(N100S/F403I/T186I/L302V/I83F/I102P); pETDuet-Fdx-Fdr |
| <i>E. coli</i> (P450pyrM11)             | pRSFDuet-P450(pyrT185K), pETDuet-Fdx-Fdr                              |
| <i>E. coli</i> (P450pyrM12)             | pRSFDuet-P450(pyrT259A), pETDuet-Fdx-Fdr                              |
| <i>E. coli</i> (P450pyrM13)             | pRSFDuet-P450(pyrT185V), pETDuet-Fdx-Fdr                              |
| <i>E. coli</i> (pET-28b)                | pET-28b(+)                                                            |
| <i>E. coli</i> (pCDFDuet-1)             | pCDFDuet-1                                                            |
| <i>E. coli</i> (pRSFDuet-1)             | pRSFDuet-1                                                            |
| <i>E. coli</i> (pETDuet-1)              | pETDuet-1                                                             |

**Table S2.** Screening biocatalysts used for asymmetric hydroxylation of **1a**.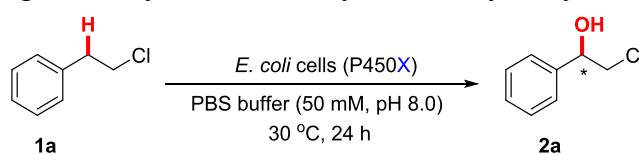

| Entry <sup>a</sup> | Biocatalyst                             | Yield (%)              | ee (%)                 | Absolute configuration <sup>c</sup> |
|--------------------|-----------------------------------------|------------------------|------------------------|-------------------------------------|
|                    |                                         | <b>2a</b> <sup>b</sup> | <b>2a</b> <sup>b</sup> |                                     |
| 1                  | <i>E. coli</i> (P450 <sub>PL2</sub> -1) | 47.8±2.9               | 74.9±1.6               | <i>R</i>                            |
| 2                  | <i>E. coli</i> (P450 <sub>PL2</sub> -2) | 25.6±2.1               | 76.4±0.9               | <i>R</i>                            |
| 3                  | <i>E. coli</i> (P450 <sub>PL2</sub> -3) | 32.6±1.1               | 76.8±0.2               | <i>R</i>                            |
| 4                  | <i>E. coli</i> (P450 <sub>PL2</sub> -4) | 49.1±2.2               | 77.0±0.5               | <i>R</i>                            |
| 5                  | <i>E. coli</i> (P450 <sub>PL2</sub> -5) | 19.8±1.3               | 76.8±0.3               | <i>R</i>                            |
| 6                  | <i>E. coli</i> (P450 <sub>PL7</sub> -1) | 48.3±3.2               | 76.5±0.1               | <i>R</i>                            |
| 7                  | <i>E. coli</i> (P450 <sub>PL7</sub> -2) | 31.5±2.7               | 76.4±0.4               | <i>R</i>                            |
| 8                  | <i>E. coli</i> (P450 <sub>PL7</sub> -3) | 32.7±1.8               | 76.4±0.3               | <i>R</i>                            |
| 9                  | <i>E. coli</i> (P450 <sub>PL7</sub> -4) | 48.9±1.3               | 75.9±0.2               | <i>R</i>                            |
| 10                 | <i>E. coli</i> (P450 <sub>PL7</sub> -5) | 17.2±0.9               | 75.9±1.6               | <i>R</i>                            |
| 11                 | <i>E. coli</i> (P450pyr-M1)             | n.d.                   | n.d.                   | n.d.                                |
| 12                 | <i>E. coli</i> (P450pyr-M2)             | n.d.                   | n.d.                   | n.d.                                |
| 13                 | <i>E. coli</i> (P450pyr-M3)             | n.d.                   | n.d.                   | n.d.                                |
| 14                 | <i>E. coli</i> (P450pyr-M4)             | 2.8±0.1                | 34.5±7.3               | <i>S</i>                            |
| 15                 | <i>E. coli</i> (P450pyr-M5)             | n.d.                   | n.d.                   | n.d.                                |
| 16                 | <i>E. coli</i> (P450pyr-M6)             | 17.3±0.8               | 89.5±1.9               | <i>S</i>                            |
| 17                 | <i>E. coli</i> (P450pyr-M7)             | n.d.                   | n.d.                   | n.d.                                |
| 18                 | <i>E. coli</i> (P450pyr-M8)             | n.d.                   | n.d.                   | n.d.                                |
| 19                 | <i>E. coli</i> (P450pyr-M9)             | 8.0±1.0                | 57.1±4.9               | <i>S</i>                            |
| 20                 | <i>E. coli</i> (P450pyr-M10)            | n.d.                   | n.d.                   | n.d.                                |
| 21                 | <i>E. coli</i> (P450pyr-M11)            | n.d.                   | n.d.                   | n.d.                                |
| 22                 | <i>E. coli</i> (P450pyr-M12)            | n.d.                   | n.d.                   | n.d.                                |
| 23                 | <i>E. coli</i> (P450pyr-M13)            | n.d.                   | n.d.                   | n.d.                                |
| 24                 | <i>E. coli</i> (pET28-b)                | n.d.                   | n.d.                   | n.d.                                |
| 25                 | <i>E. coli</i> (pCDFDuet-1)             | n.d.                   | n.d.                   | n.d.                                |
| 26                 | <i>E. coli</i> (pRSFDuet-1)             | n.d.                   | n.d.                   | n.d.                                |
| 27                 | <i>E. coli</i> (pETDuet-1)              | n.d.                   | n.d.                   | n.d.                                |

<sup>a</sup> Reactions were carried out in 5 mL PBS buffer (50 mM, pH 8.0) containing 2 mM of substrate **1a** and 10 g cdw/L of recombinant *E. coli* cells.

<sup>b</sup> Yield and ee values were measured with three parallel samples by chiral HPLC analysis after incubation at 30 °C for 24 h.

<sup>c</sup> Absolute configuration was confirmed using commercial (*R*)-**2a** and (*R,S*)-**2a**.

n.d. = not determined.

**Table S3.** Optimization of the cell density of the *E. coli* (P450<sub>PL2-4</sub>) catalyzed asymmetric hydroxylation of **1a**.

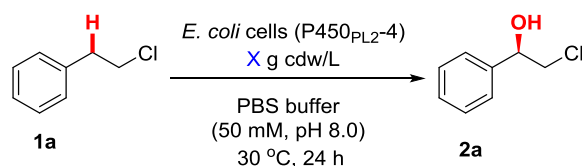

| Entry <sup>a</sup> | biocatalyst loading (g cdw/L) | Yield (%) <b>2a</b> <sup>b</sup> | ee (%) ( <i>R</i> )- <b>2a</b> <sup>b</sup> |
|--------------------|-------------------------------|----------------------------------|---------------------------------------------|
| 1                  | 5                             | 33.6±0.4                         | 76.5±0.3                                    |
| 2                  | 10                            | 40.5±1.2                         | 77.1±0.1                                    |
| 3                  | 20                            | 49.1±0.7                         | 77.9±0.3                                    |
| 4                  | 30                            | 61.5±2.7                         | 84.8±0.1                                    |
| 5                  | 50                            | 54.9±5.8                         | 84.7±0.4                                    |

<sup>a</sup> Reactions were carried out in 5 mL PBS buffer (50 mM, pH 8.0) containing 2 mM of substrate **1a** and X g cdw/L recombinant *E. coli* (P450<sub>PL2-4</sub>) cells;

<sup>b</sup> Yield and ee values were measured with three parallel samples by chiral HPLC analysis after incubation at 30 °C for 12 h.

**Table S4.** Optimization of the reaction pH of the *E. coli* (P450<sub>PL2-4</sub>) catalyzed asymmetric hydroxylation of **1a**.

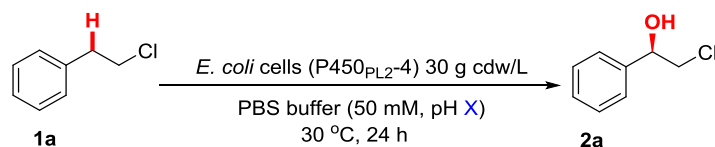

| Entry <sup>a</sup> | pH value | Yield (%) <b>2a</b> <sup>b</sup> | ee (%) ( <i>R</i> )- <b>2a</b> <sup>b</sup> |
|--------------------|----------|----------------------------------|---------------------------------------------|
| 1                  | 7.0      | 39.3±2.1                         | 93.1±1.0                                    |
| 2                  | 7.5      | 37.0±2.2                         | 94.9±0.3                                    |
| 3                  | 8.0      | 48.9±3.5                         | 93.4±0.2                                    |
| 4                  | 8.5      | 63.1±1.0                         | 89.1±0.2                                    |
| 5                  | 9.0      | 55.5±1.9                         | 91.4±0.4                                    |

<sup>a</sup> Reactions were carried out in 5 mL PBS buffer (50 mM, pH X) containing 2 mM of substrate **1a** and 30 g cdw/L of recombinant *E. coli* (P450<sub>PL2-4</sub>) cells;

<sup>b</sup> Yield and ee values were measured with three parallel samples by chiral HPLC analysis after incubation at 30 °C for 12 h.

**Table S5.** Optimization of the reaction temperature of the *E. coli* (P450<sub>PL2-4</sub>) catalyzed asymmetric hydroxylation of **1a**.

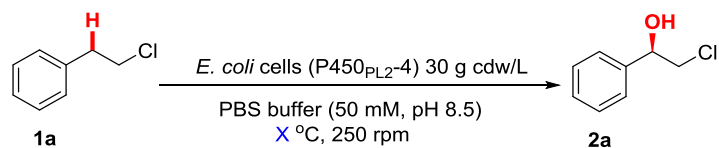

| Entry <sup>a</sup> | Reaction temperature (°C) | Yield (%) <b>2a</b> <sup>b</sup> | ee (%) ( <i>R</i> )- <b>2a</b> <sup>b</sup> |
|--------------------|---------------------------|----------------------------------|---------------------------------------------|
| 1                  | 20                        | 33.5±0.3                         | 95.5±1.5                                    |
| 2                  | 30                        | 60.2±0.6                         | 88.8±0.9                                    |
| 3                  | 35                        | 80.3±0.09                        | 81.6±0.6                                    |
| 4                  | 40                        | 72.5±0.06                        | 76.4±0.04                                   |
| 5                  | 45                        | 46.4±0.5                         | 74.7±0.04                                   |
| 6                  | 50                        | 15.8±0.3                         | 73.4±1.1                                    |

<sup>a</sup> Reactions were carried out in 5 mL PBS buffer (50 mM, pH 8.5) containing 2 mM of substrate **1a** and 30 g cdw/L of recombinant *E. coli* (P450<sub>PL2-4</sub>) cells;

<sup>b</sup> Yield and ee values were measured with three parallel samples by chiral HPLC analysis after incubation at X °C for 12 h.

**Table S6.** Chiral HPLC methods for analysis of halohydrins **2a-2m**.

**2a:** X=Cl, R=H,  
**2b:** X=Cl, R=2-CH<sub>3</sub>  
**2c:** X=Cl, R=3-CH<sub>3</sub>  
**2d:** X=Cl, R=4-CH<sub>3</sub>  
**2e:** X=Cl, R=4-F  
**2f:** X=Cl, R=3-Br,

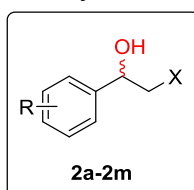

**2g:** X=Br, R=H  
**2h:** X=Br, R=2-CH<sub>3</sub>  
**2i:** X=Br, R=3-CH<sub>3</sub>  
**2j:** X=Br, R=4-CH<sub>3</sub>  
**2k:** X=Br, R=4-F  
**2l:** X=Br, R=4-Cl  
**2m:** X=Br, R=3-Br

| Entry <sup>a</sup> | Halohydrin | Analysis method <sup>a</sup> | Standard curve <sup>b</sup>       | Retention time (min)    |
|--------------------|------------|------------------------------|-----------------------------------|-------------------------|
| 1                  | <b>2a</b>  | A                            | $y=1.2924x-0.0295$ , $R^2=0.9997$ | $t_S=12.0$ , $t_R=13.0$ |
| 2                  | <b>2b</b>  | A                            | $y=1.4855x-0.0005$ , $R^2=0.9999$ | $t_S=11.0$ , $t_R=12.2$ |
| 3                  | <b>2c</b>  | A                            | $y=33619x-460.94$ , $R^2=0.9996$  | $t_S=10.2$ , $t_R=11.9$ |
| 4                  | <b>2d</b>  | A                            | $y=2.4973x+0.0086$ , $R^2=0.9999$ | $t_S=10.2$ , $t_R=10.9$ |
| 5                  | <b>2e</b>  | B                            | $y=0.4896x+0.0063$ , $R^2=0.9999$ | $t_R=14.7$ , $t_S=15.4$ |
| 6                  | <b>2f</b>  | A                            | $y=2.2953x+0.0116$ , $R^2=0.9999$ | $t_R=12.6$ , $t_S=15.1$ |
| 7                  | <b>2g</b>  | A                            | $y=1.8283x+0.0083$ , $R^2=0.9999$ | $t_S=12.4$ , $t_R=13.4$ |
| 8                  | <b>2h</b>  | A                            | $y=1.9742x+0.0029$ , $R^2=0.9997$ | $t_R=11.4$ , $t_S=12.9$ |
| 9                  | <b>2i</b>  | A                            | $y=2.3756x+0.0026$ , $R^2=0.9999$ | $t_S=10.7$ , $t_R=12.6$ |
| 10                 | <b>2j</b>  | A                            | $y=2.8416x+0.0573$ , $R^2=0.9989$ | $t_S=10.5$ , $t_R=11.5$ |
| 11                 | <b>2k</b>  | B                            | $y=76482x-15985$ , $R^2=0.9998$   | $t_R=14.0$ , $t_S=14.7$ |
| 12                 | <b>2l</b>  | C                            | $y=1.0345x+0.0088$ , $R^2=0.9999$ | $t_R=13.2$ , $t_S=14.5$ |
| 13                 | <b>2m</b>  | A                            | $y=3.3972x-0.1156$ , $R^2=0.9994$ | $t_R=13.0$ , $t_S=15.4$ |

<sup>a</sup> Analysis method: (A) OD-H column, 2-propanol:hexane = 5:95, 1 mL/min, 220 nm; (B) OJ-H column, 2-propanol:hexane = 10:90, 0.8 mL/min, 220 nm; (C) OJ-H column, 2-propanol:hexane = 10:90, 0.8 mL/min, 215 nm; (D) AD-H column, 2-propanol:hexane = 5:95, 1 mL/min, 220 nm.

<sup>b</sup> The standard curves of **2c** and **2k** were drew using external standard method, x = the concentration of halohydrin, y = the peak area of halohydrin; The other standard curves were drew using internal standard method, x = the concentration of halohydrin, y = the ration of the peak area of halohydrin to the peak area of internal standard (2 mM phenethylol).

## References

- Pluempanupat W, Chavasiri W. An efficient method for chlorination of alcohols using PPh<sub>3</sub>/Cl<sub>3</sub>C(ONH<sub>2</sub>). Tetrahedron letters, 2006, 47(38): 6821-6823.
- Han Y, Zheng B, Peng Y. Construction of Chiral 2-Substituted Octahydroindoles from Cyclic Ketones and Nitroolefins Bearing only One  $\alpha$ -Substituent. Advanced Synthesis & Catalysis, 2015, 357(6): 1136-1142.
- Wan N, Tian J, Wang H, et al. Identification and characterization of a highly S-enantioselective halohydrin dehalogenase from Tsukamurella sp. 1534 for kinetic resolution of halohydrins. Bioorganic chemistry, 2018, 81: 529-535.
- Swamy P, Kumar M A, Reddy M M, et al. The vicinal functionalization of olefins: a facile route to the direct synthesis of  $\beta$ -chlorohydrins and  $\beta$ -chloroethers. RSC Advances, 2014, 4(50): 26288-26294.
- Zhang X, Li J, Tian H, et al. Catalytic Asymmetric Bromination of Unfunctionalized Olefins with H<sub>2</sub>O as a Nucleophile. Chemistry-A European Journal, 2015, 21(33): 11658-11663.

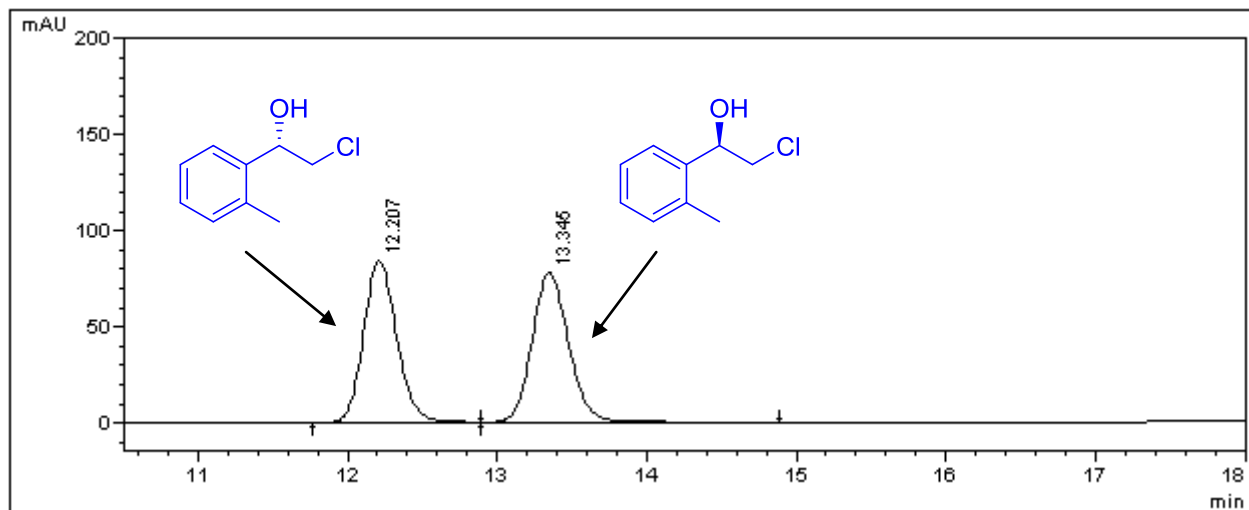

**Synthesized by chemical method**

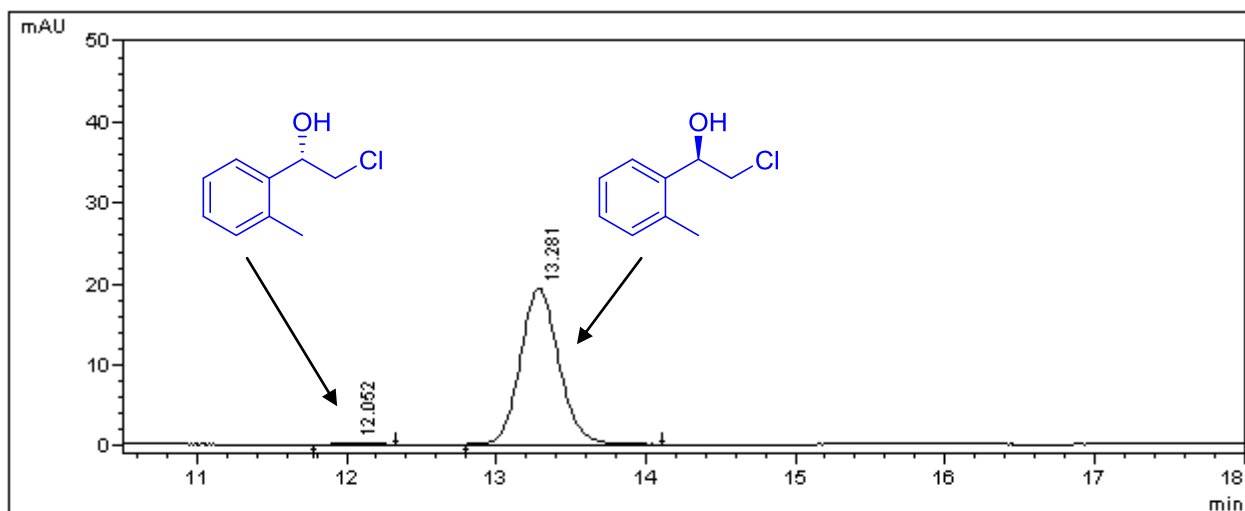

| PDA |          |        |        |        |
|-----|----------|--------|--------|--------|
| ID# | Rt. Time | Area   | Height | Area % |
| 1   | 12.052   | 4000   | 271    | 1.145  |
| 2   | 13.281   | 345291 | 19249  | 98.855 |

**Synthesized by cascade bio-hydroxylation and dehalogenation**

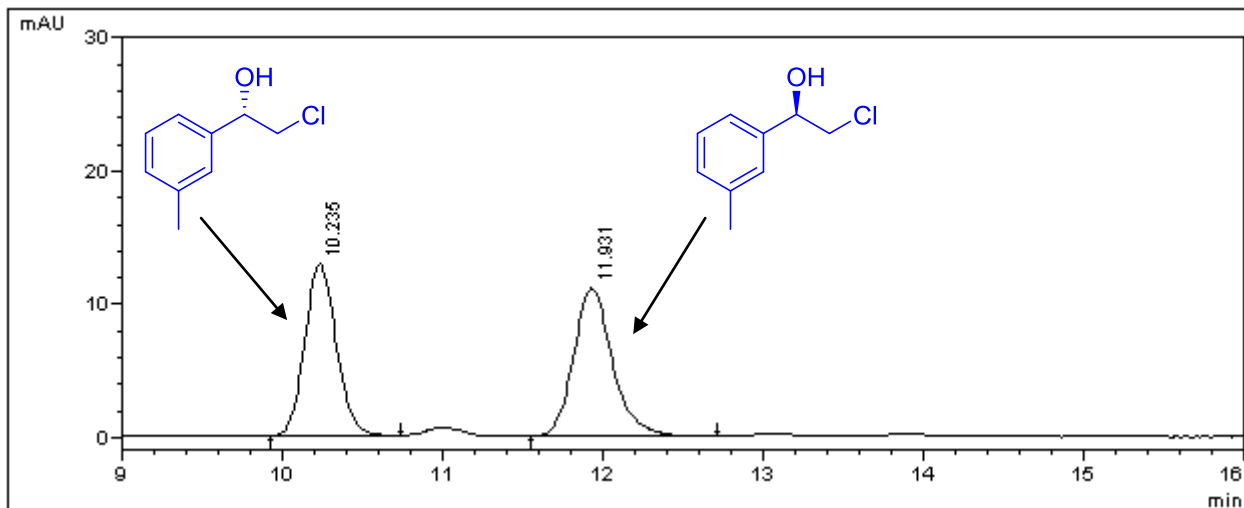

**Synthesized by chemical method**

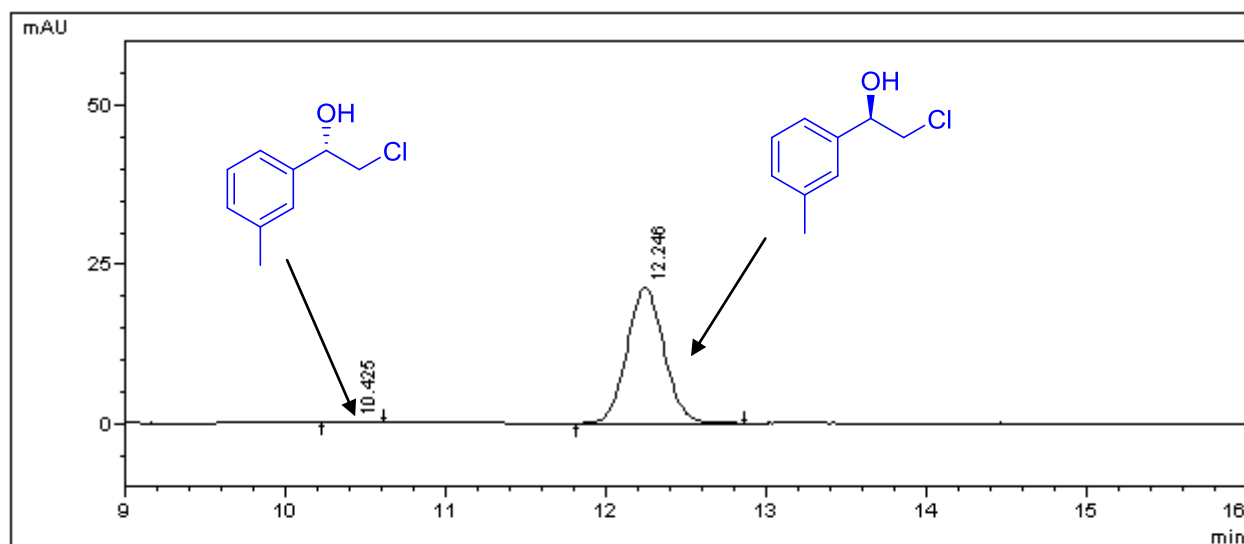

| ID# | Rt. Time | Area   | Height | Area % |
|-----|----------|--------|--------|--------|
| 1   | 10.425   | 2667   | 231    | 0.775  |
| 2   | 12.246   | 341474 | 21306  | 99.225 |

**Synthesized by cascade bio-hydroxylation and dehalogenation**



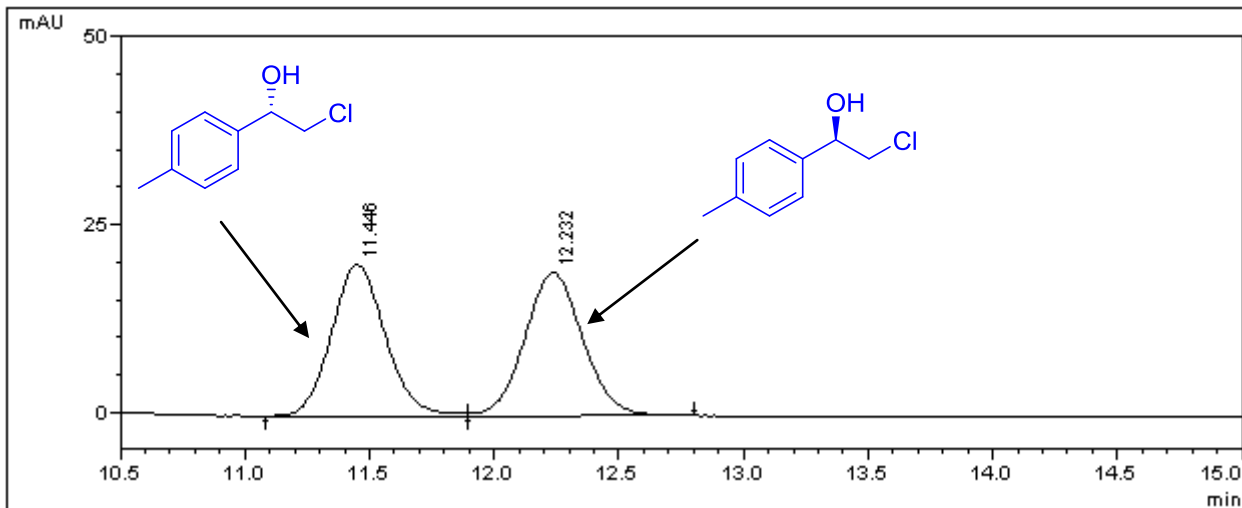

**Synthesized by chemical method**

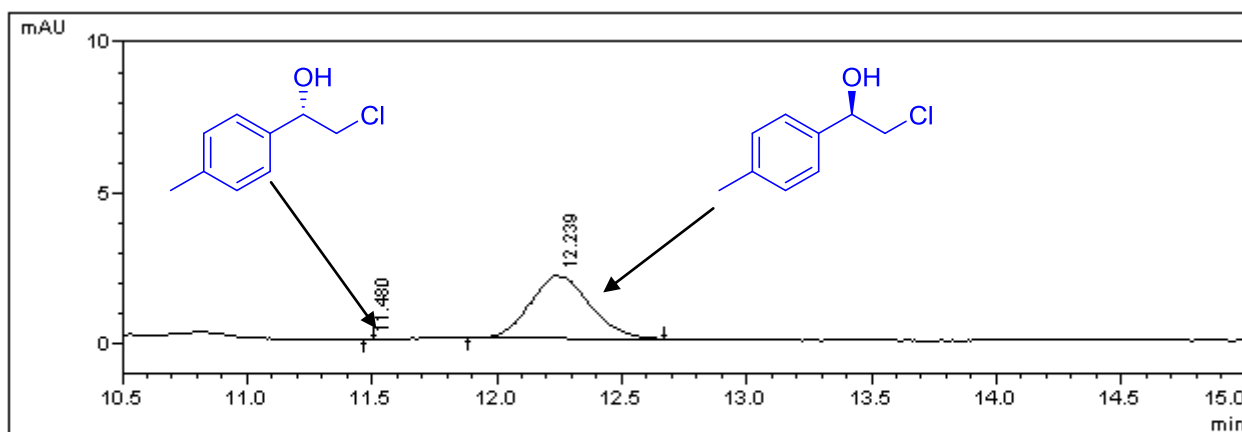

| PDA |          |       |        |         |
|-----|----------|-------|--------|---------|
| ID# | Rt. Time | Area  | Height | Area %  |
| 1   | 11.480   | -5    | 3      | -0.016  |
| 2   | 12.239   | 34440 | 2063   | 100.016 |

**Synthesized by cascade bio-hydroxylation and dehalogenation**

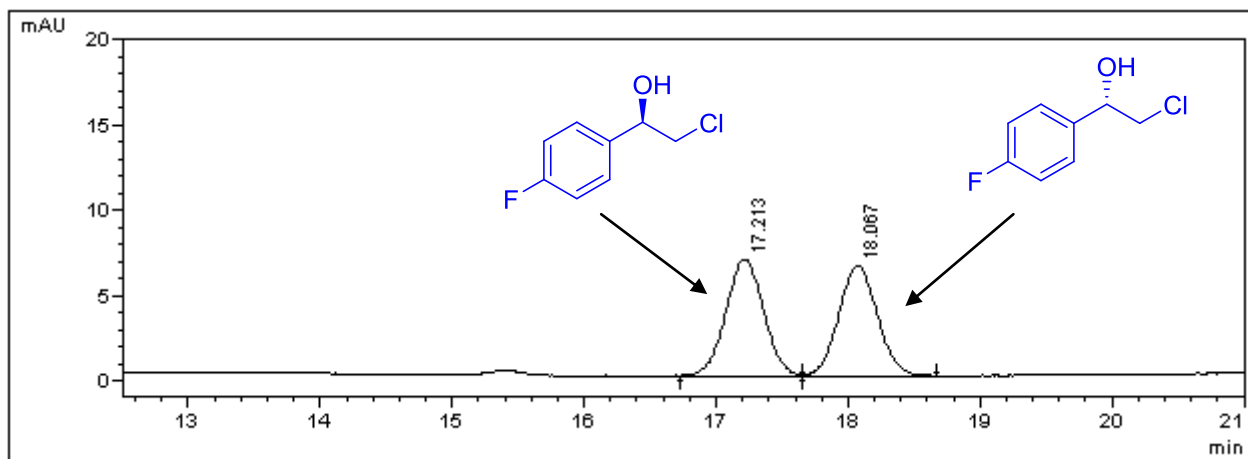

**Synthesized by chemical method**

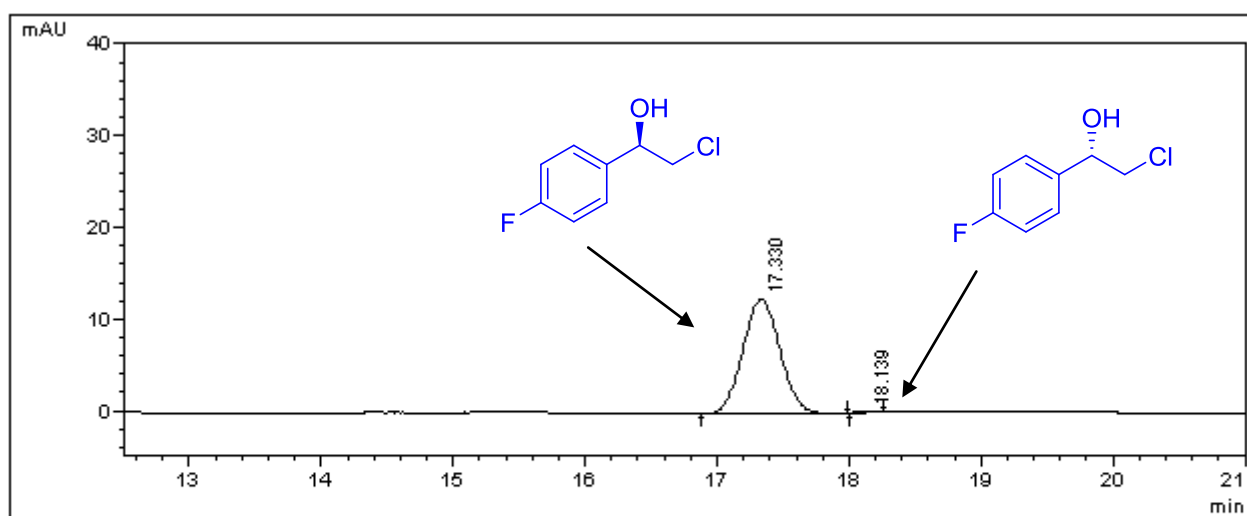

| ID# | Rt. Time | Area   | Height | Area % |
|-----|----------|--------|--------|--------|
| 1   | 17.330   | 244362 | 12516  | 99.823 |
| 2   | 18.139   | 432    | 45     | 0.177  |

**Synthesized by cascade bio-hydroxylation and dehalogenation**

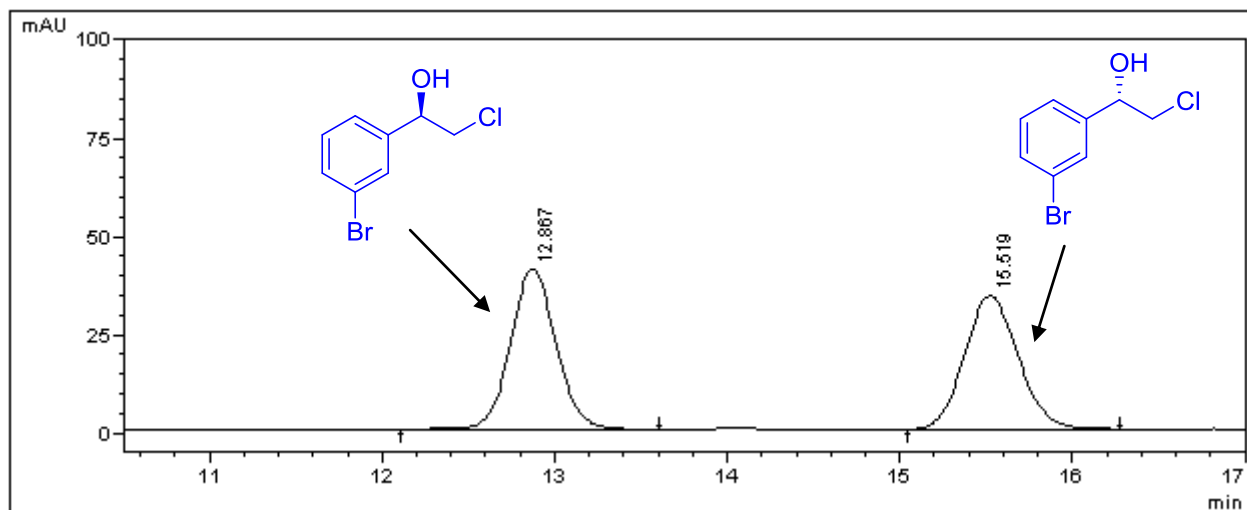

**Synthesized by chemical method**

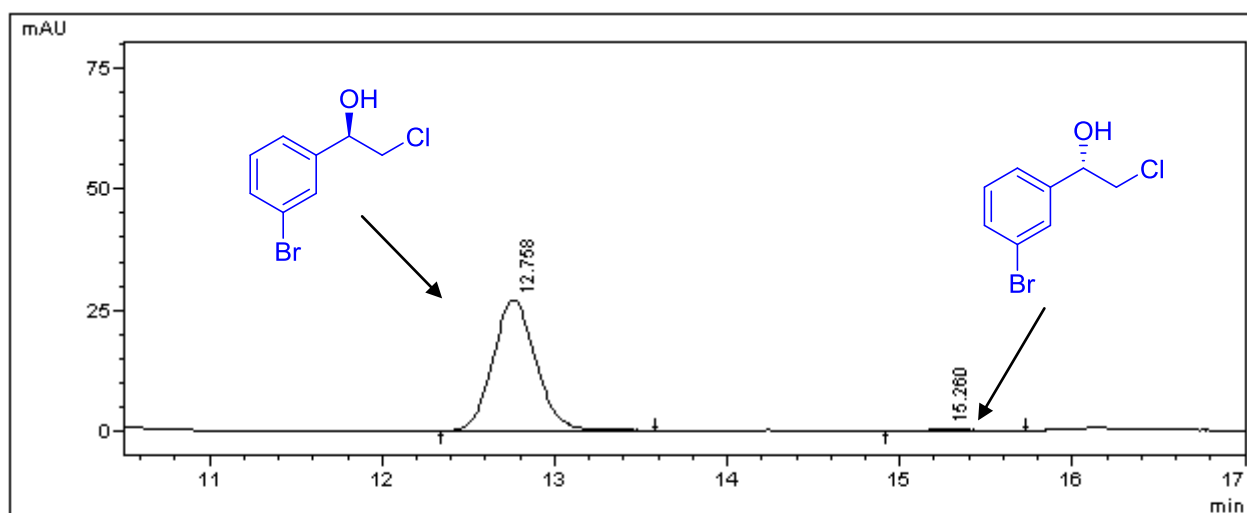

| PDA |          |        |        |        |
|-----|----------|--------|--------|--------|
| ID# | Rt. Time | Area   | Height | Area % |
| 1   | 12.758   | 464824 | 26869  | 99.593 |
| 2   | 15.260   | 1902   | 119    | 0.407  |

**Synthesized by cascade bio-hydroxylation and dehalogenation**

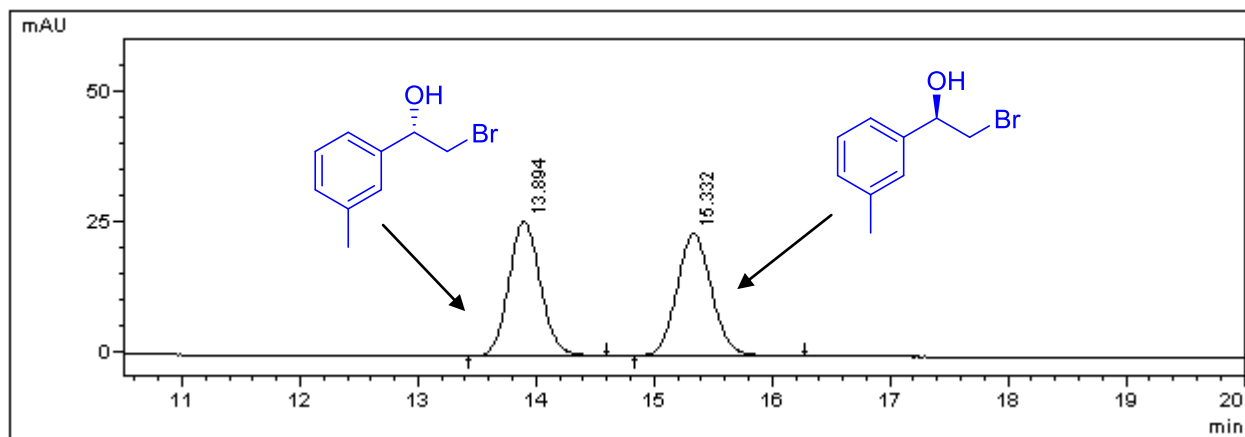

**Synthesized by chemical method**

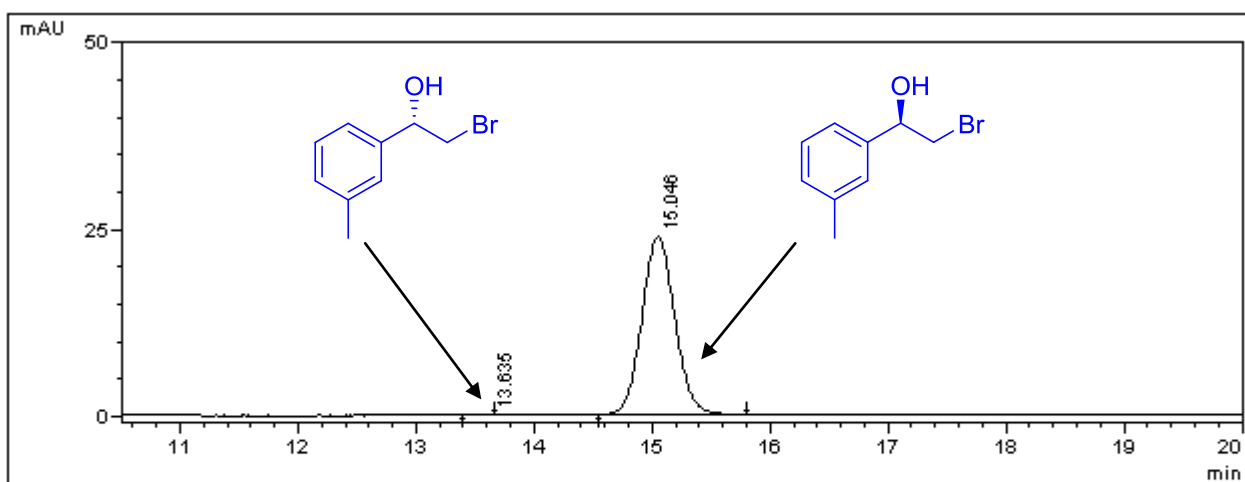

| PDA |          |        |        |        |
|-----|----------|--------|--------|--------|
| ID# | Rt. Time | Area   | Height | Area % |
| 1   | 13.635   | 83     | 23     | 0.018  |
| 2   | 15.046   | 460612 | 23805  | 99.982 |

**Synthesized by cascade bio-hydroxylation and dehalogenation**

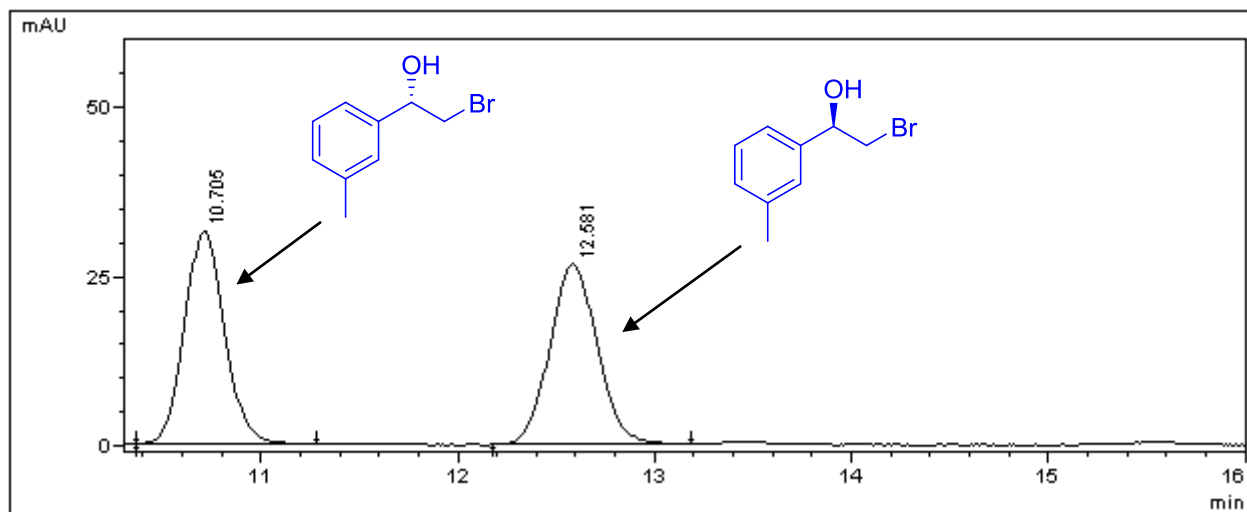

**Synthesized by chemical method**

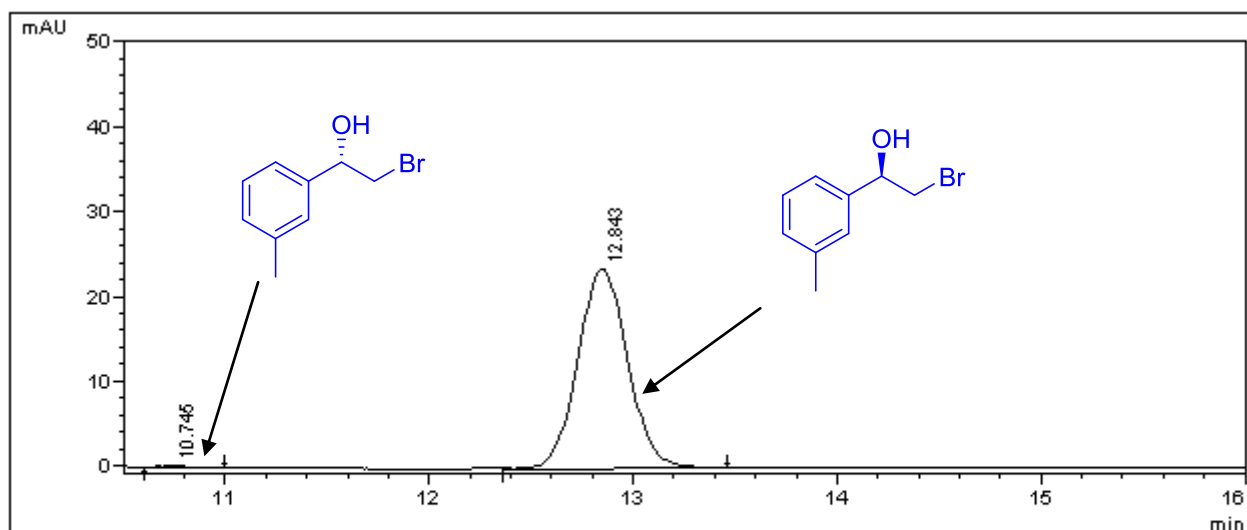

| ID# | Rt. Time | Area   | Height | Area % |
|-----|----------|--------|--------|--------|
| 1   | 10.745   | 1026   | 92     | 0.257  |
| 2   | 12.843   | 397711 | 23542  | 99.743 |

**Synthesized by cascade bio-hydroxylation and dehalogenation**

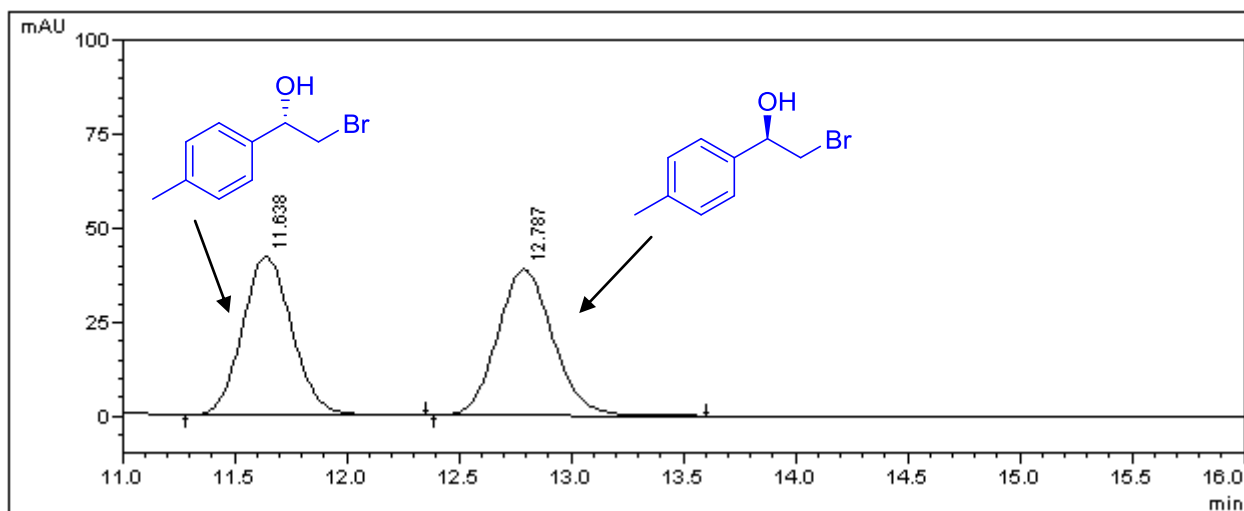

**Synthesized by chemical method**

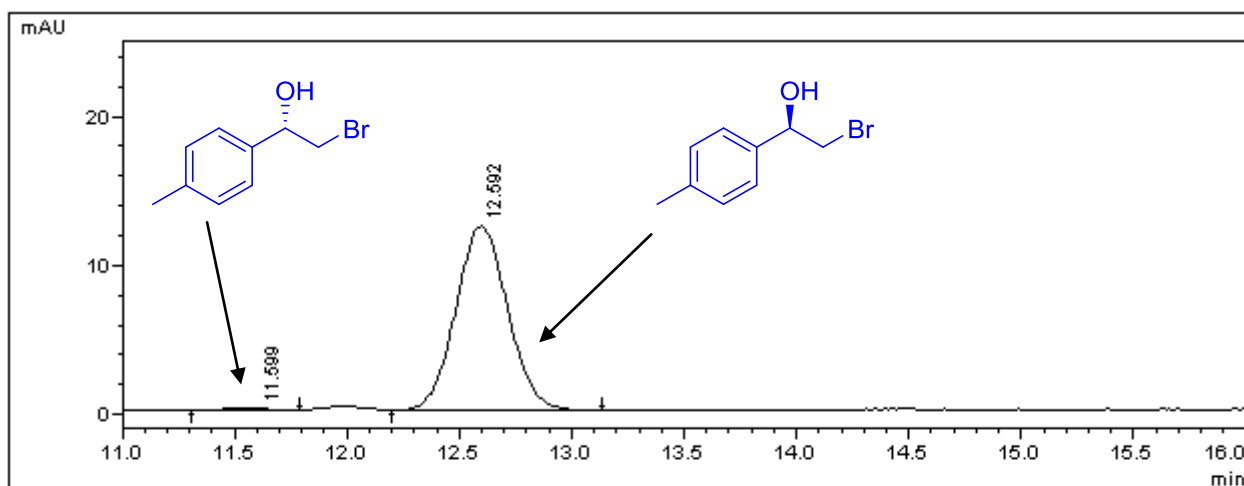

| PDA |          |        |        |        |
|-----|----------|--------|--------|--------|
| ID# | Rt. Time | Area   | Height | Area % |
| 1   | 11.599   | 1215   | 95     | 0.606  |
| 2   | 12.592   | 199242 | 12379  | 99.394 |

**Synthesized by cascade bio-hydroxylation and dehalogenation**

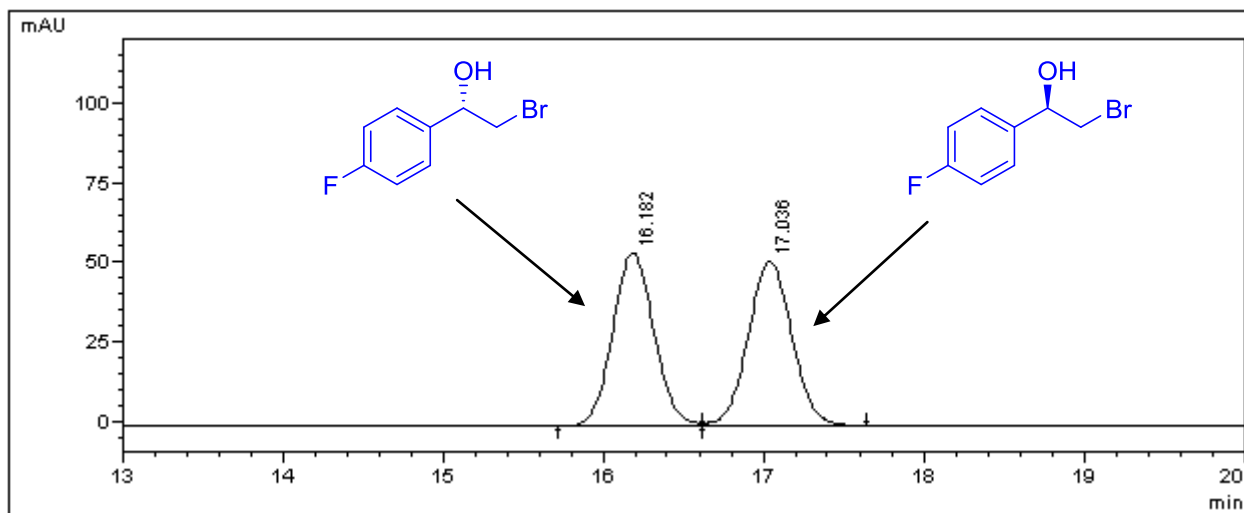

**Synthesized by chemical method**

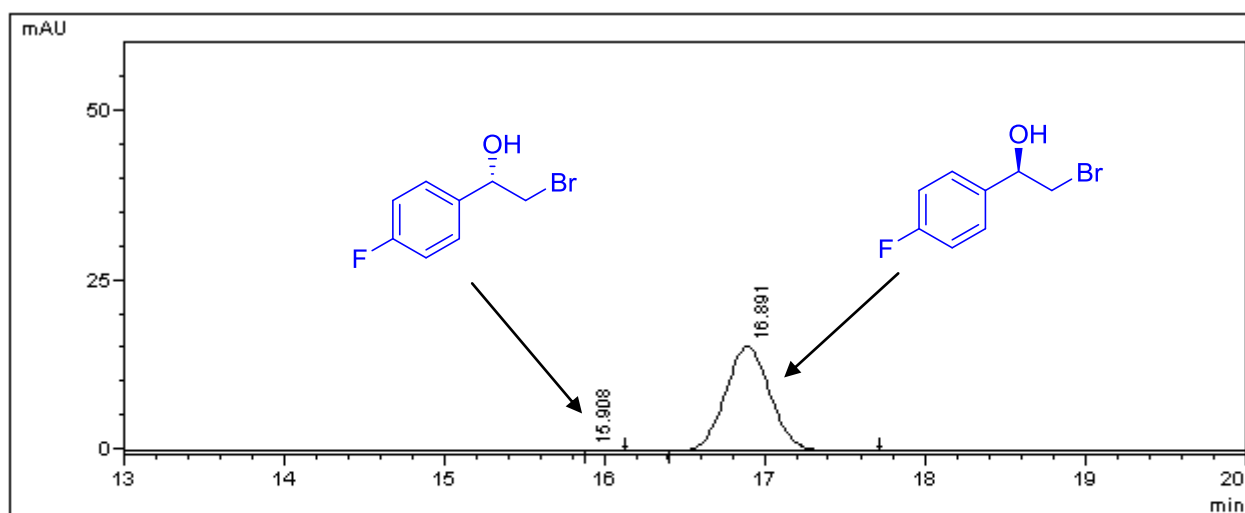

| PDA |          |        |        |        |
|-----|----------|--------|--------|--------|
| ID# | Rt. Time | Area   | Height | Area % |
| 1   | 15.908   | 84     | 22     | 0.028  |
| 2   | 16.891   | 303747 | 15450  | 99.972 |

**Synthesized by cascade bio-hydroxylation and dehalogenation**

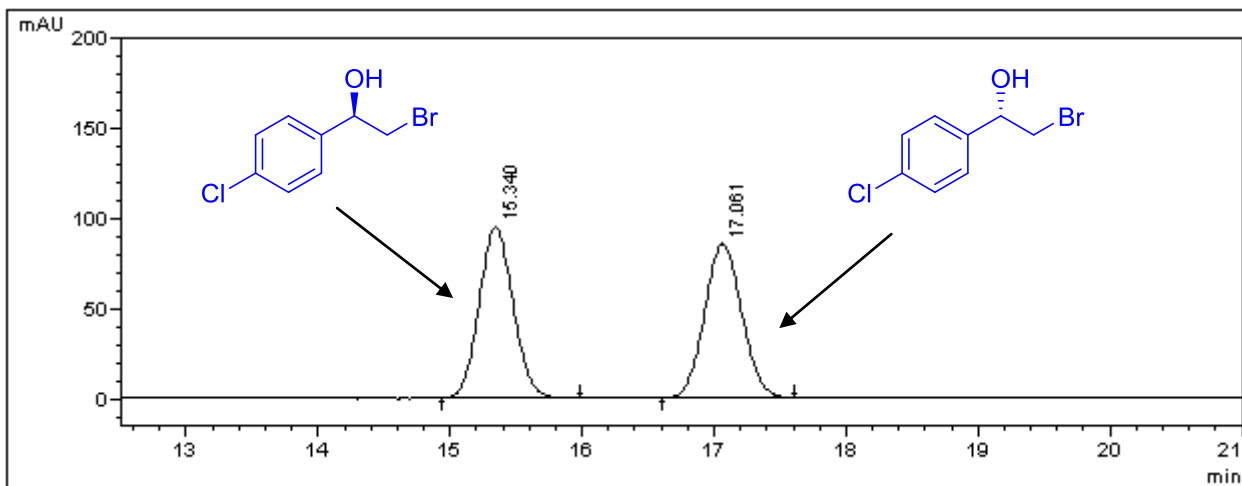

**Synthesized by chemical method**

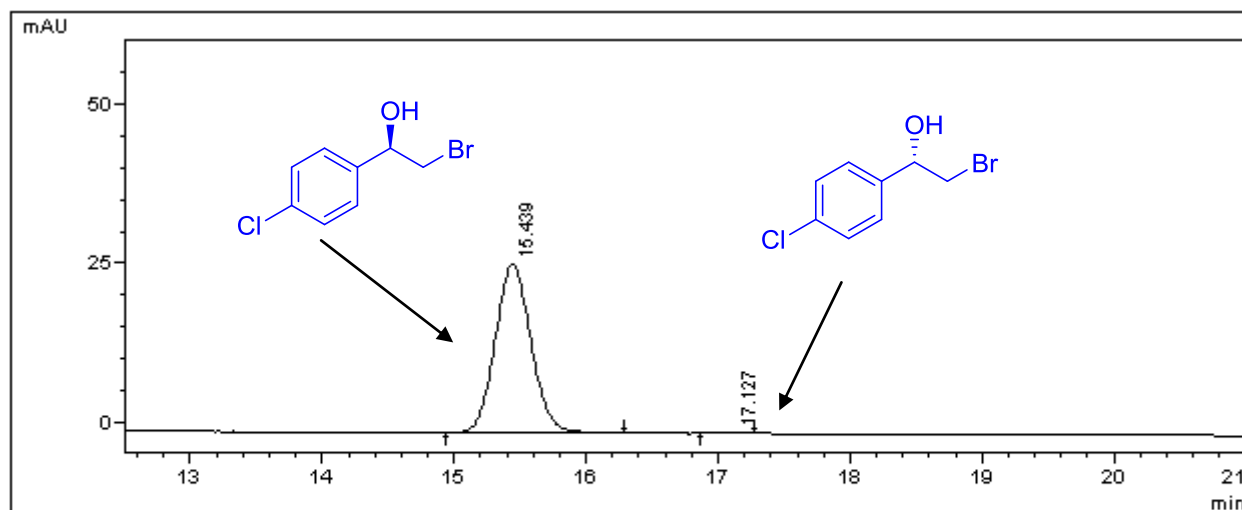

| FDA |          |        |        |        |
|-----|----------|--------|--------|--------|
| ID# | Rt. Time | Area   | Height | Area % |
| 1   | 15.439   | 501505 | 26505  | 99.819 |
| 2   | 17.127   | 909    | 87     | 0.181  |

**Synthesized by cascade bio-hydroxylation and dehalogenation**



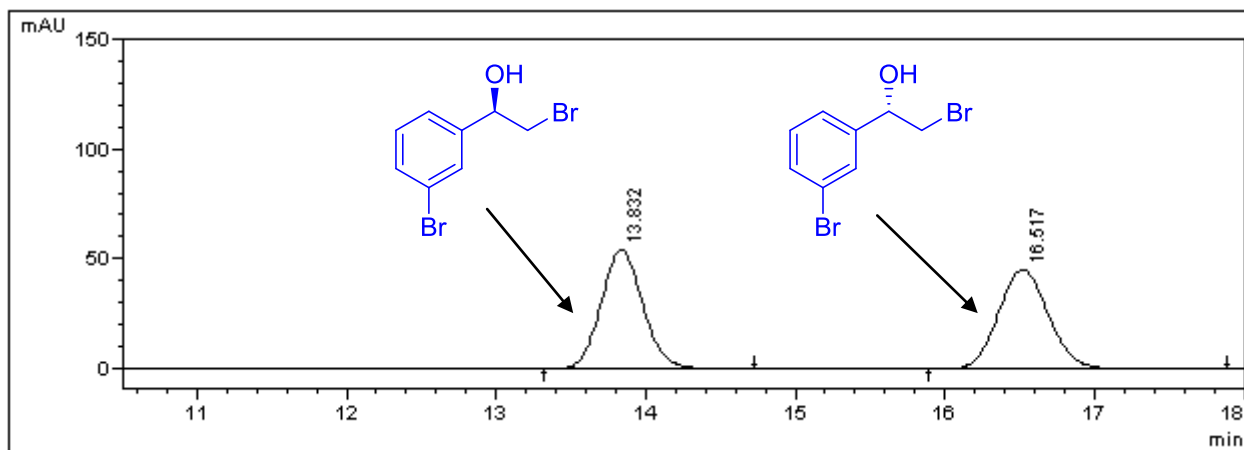

**Synthesized by chemical method**

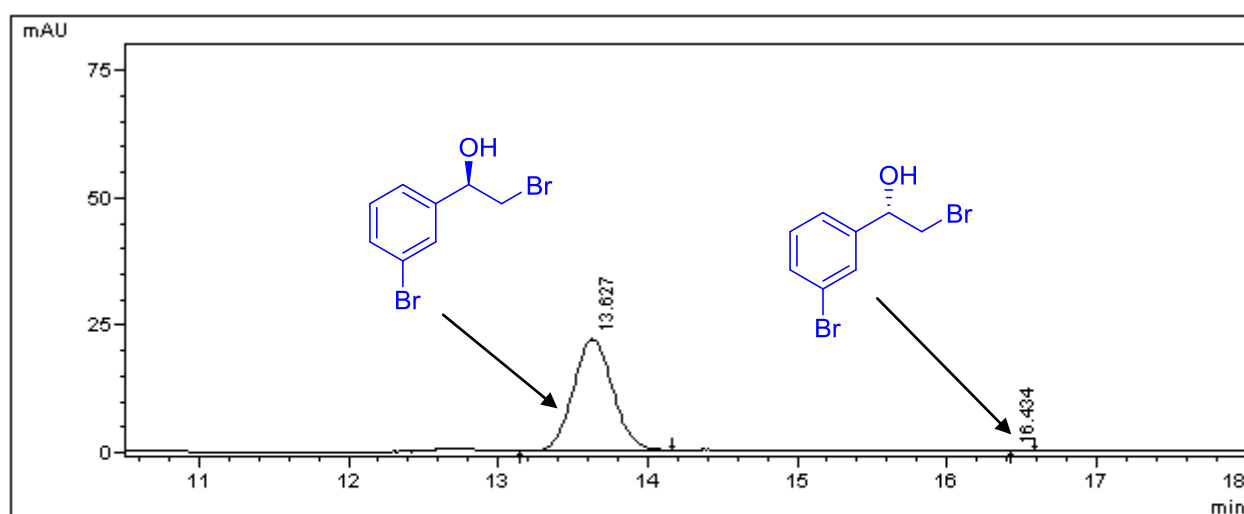

| PDA |          |        |        |        |
|-----|----------|--------|--------|--------|
| ID# | Rt. Time | Area   | Height | Area % |
| 1   | 13.627   | 402306 | 21928  | 99.991 |
| 2   | 16.434   | 36     | 10     | 0.009  |

**Synthesized by cascade bio-hydroxylation and dehalogenation**

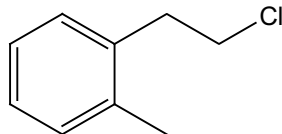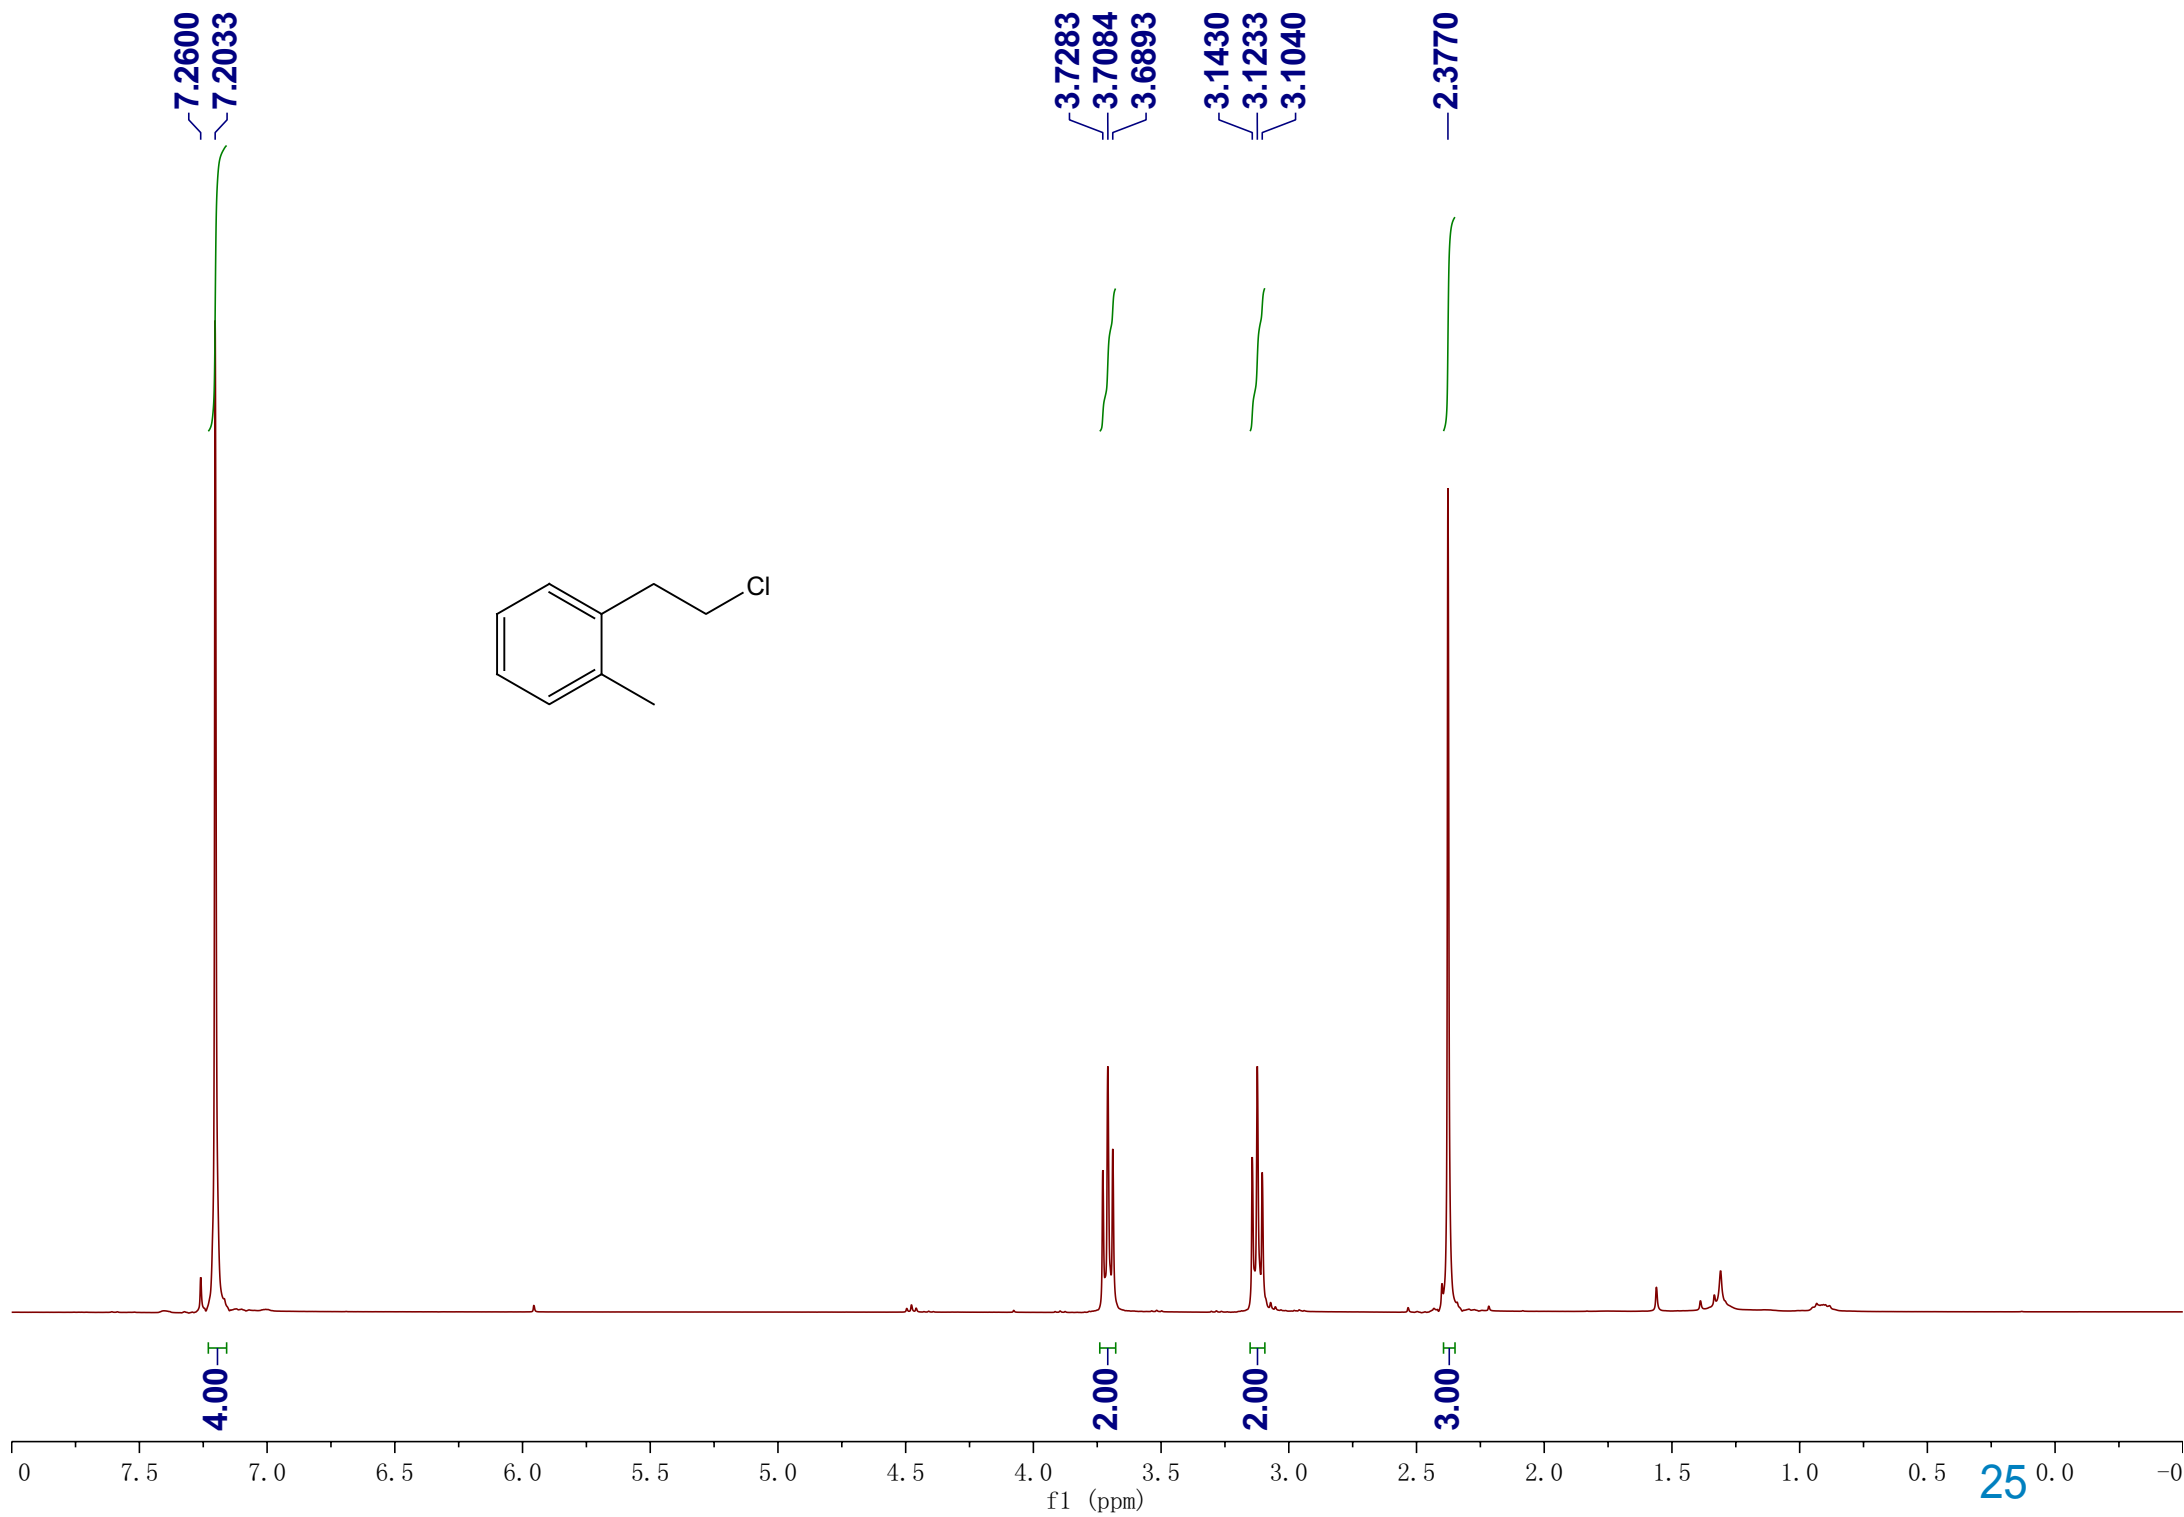

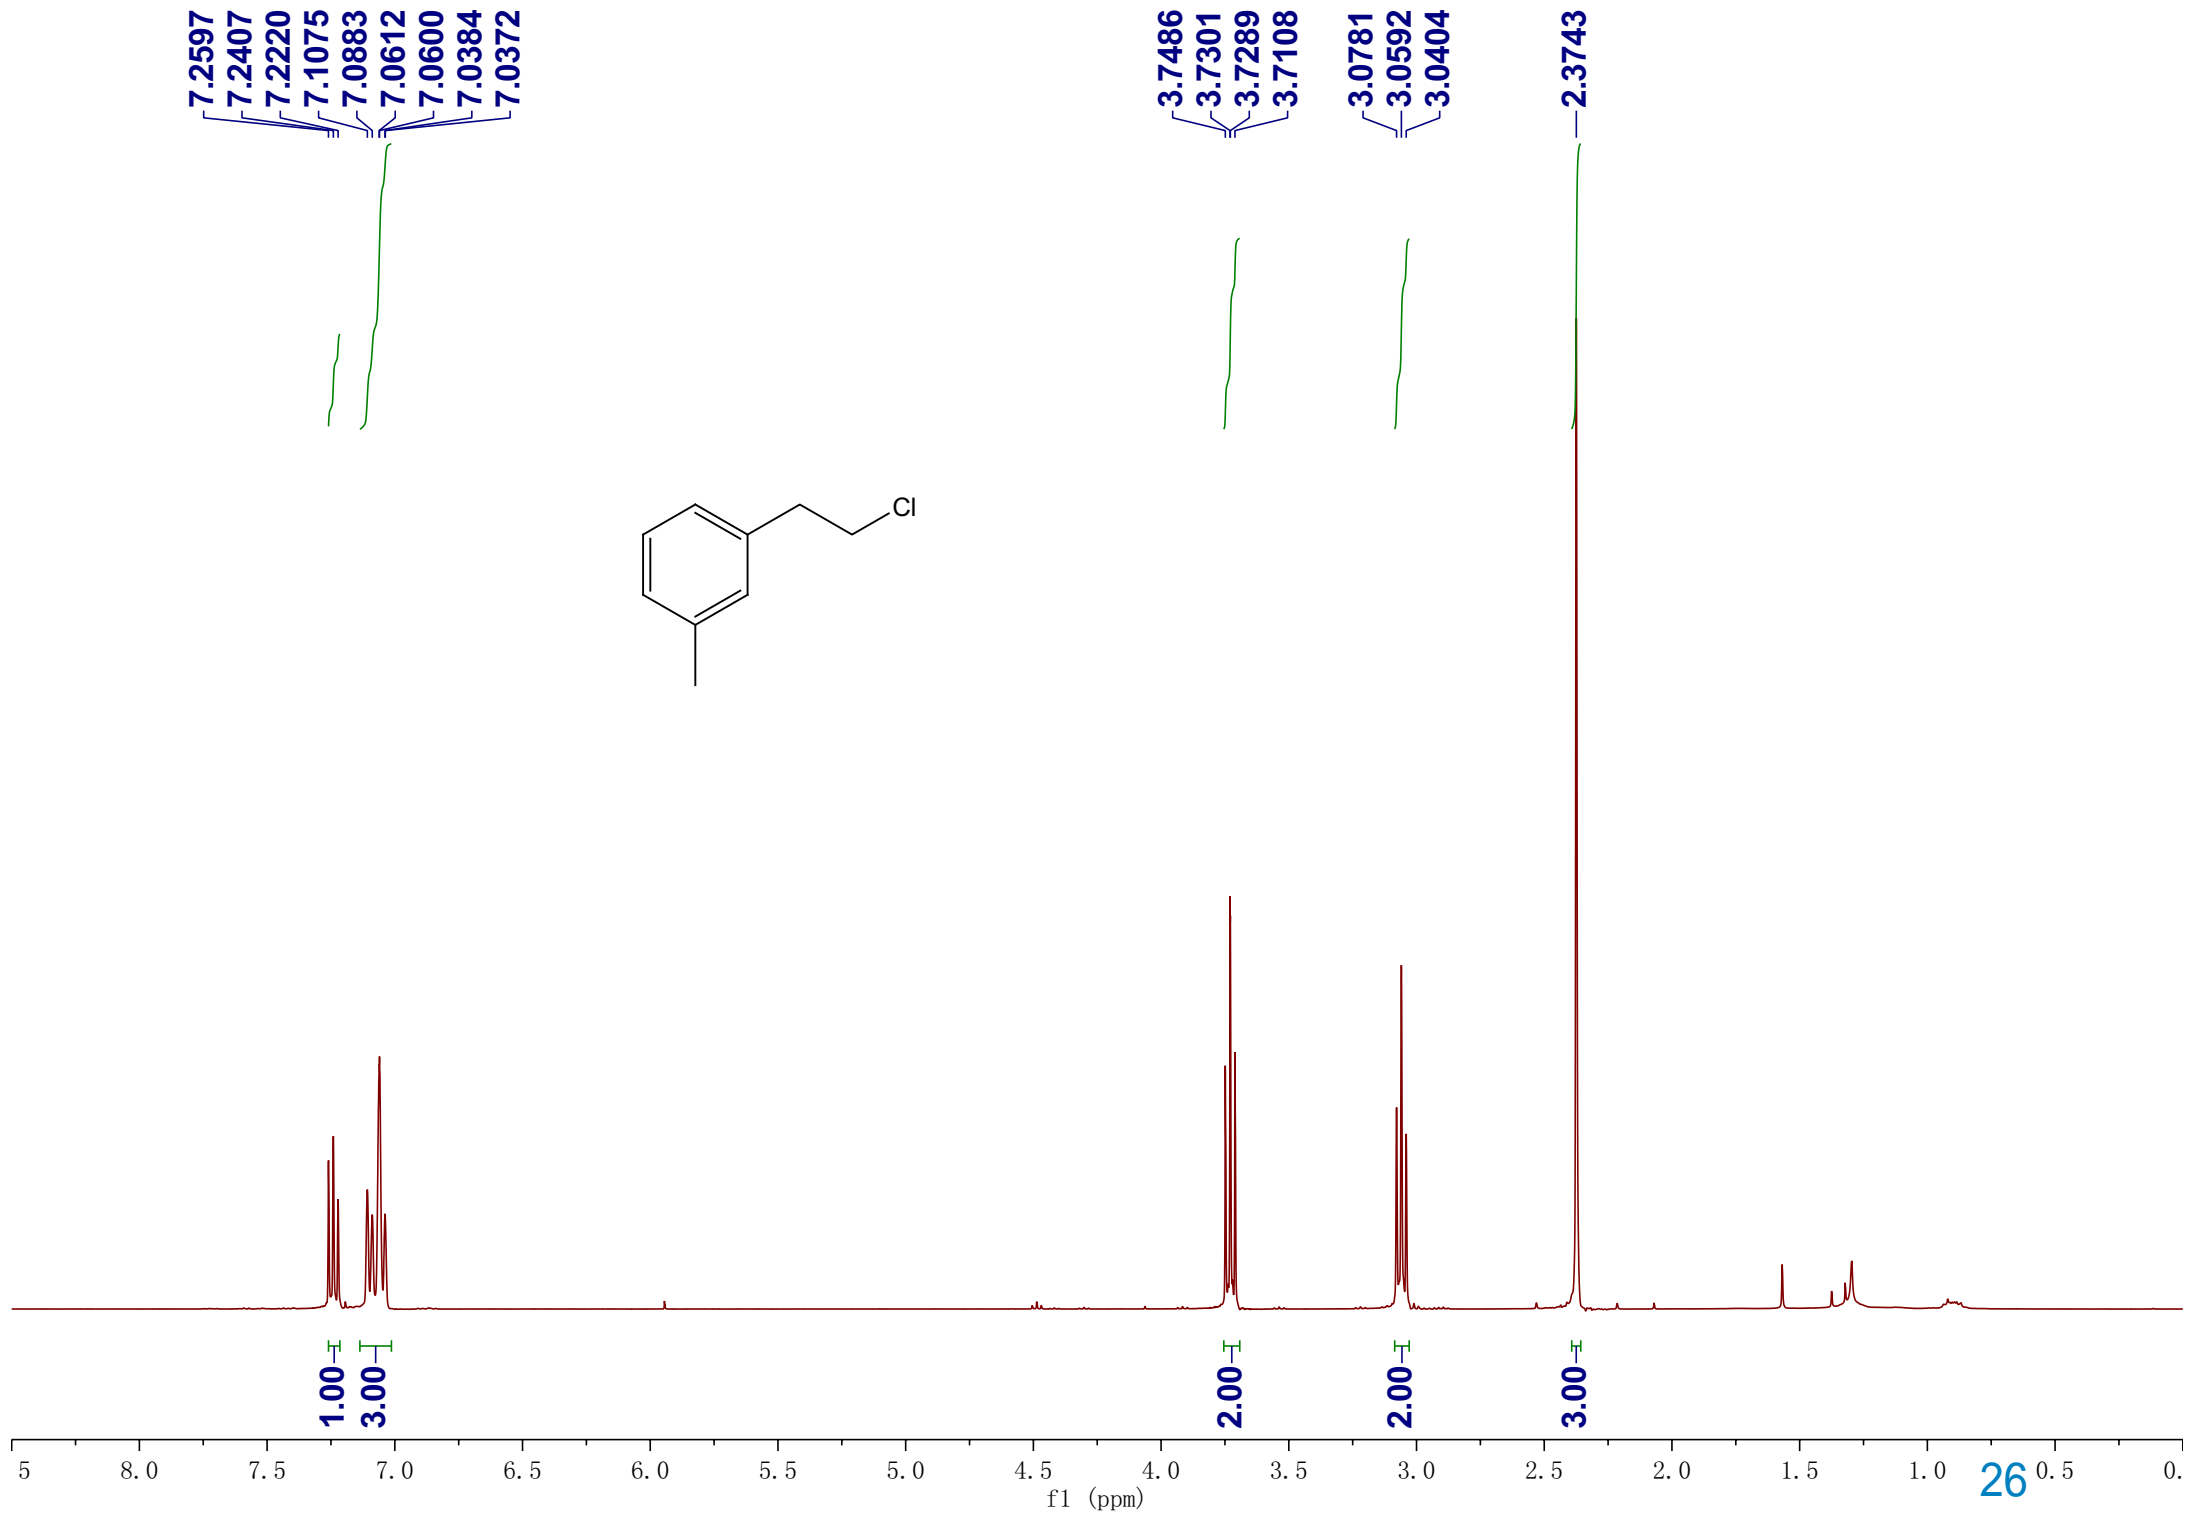

7.2600  
7.2052  
7.1885  
7.1697  
7.1493

3.6201  
3.6132  
3.6007  
3.5943  
3.5817  
3.5749  
3.2011  
3.1961  
3.1818  
3.1628

2.3987

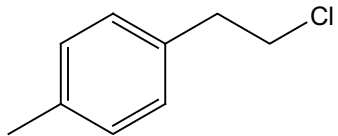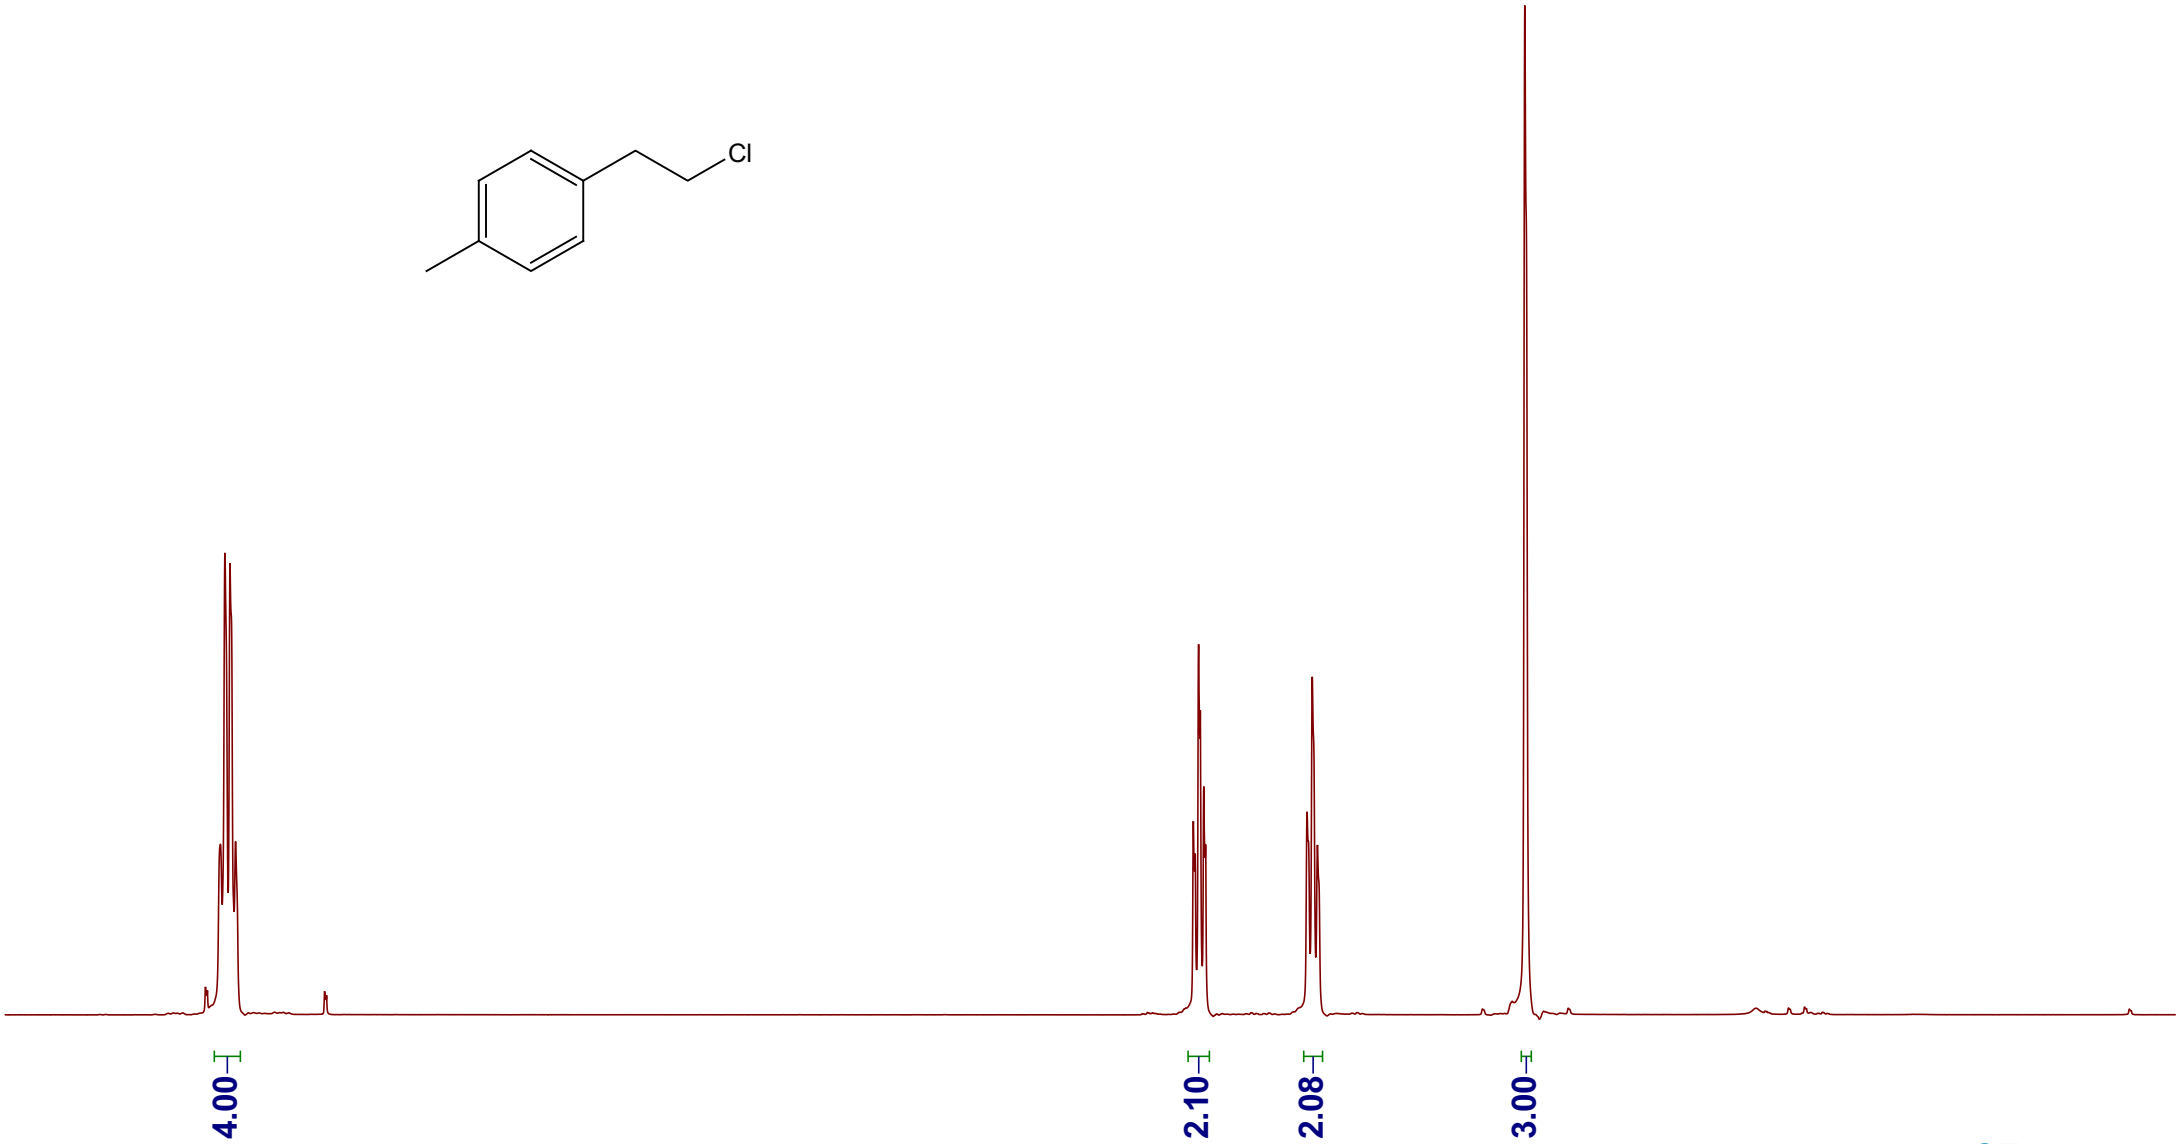

4.00

2.10

2.08

3.00

7.2601  
7.1975  
7.1837  
7.1691  
7.0308  
7.0266  
7.0095  
6.9882

3.7116  
3.7064  
3.6936  
3.6756  
3.0599  
3.0422  
3.0244

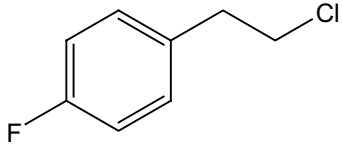

2.00  
2.01

2.08

2.06

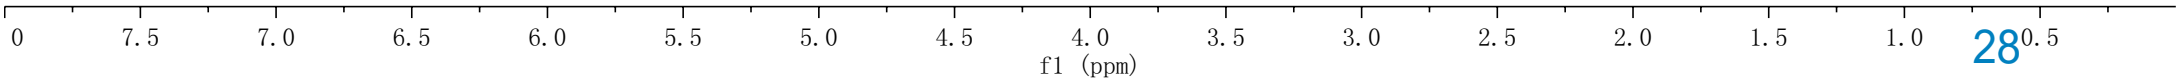

7.4067  
7.4036  
7.3861  
7.3855  
7.2600  
7.2184  
7.2167  
7.1977  
7.1816  
7.1797  
7.1669  
7.1479

3.7234  
3.7052  
3.6871  
3.0570  
3.0389  
3.0208

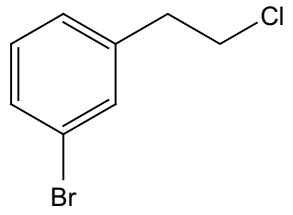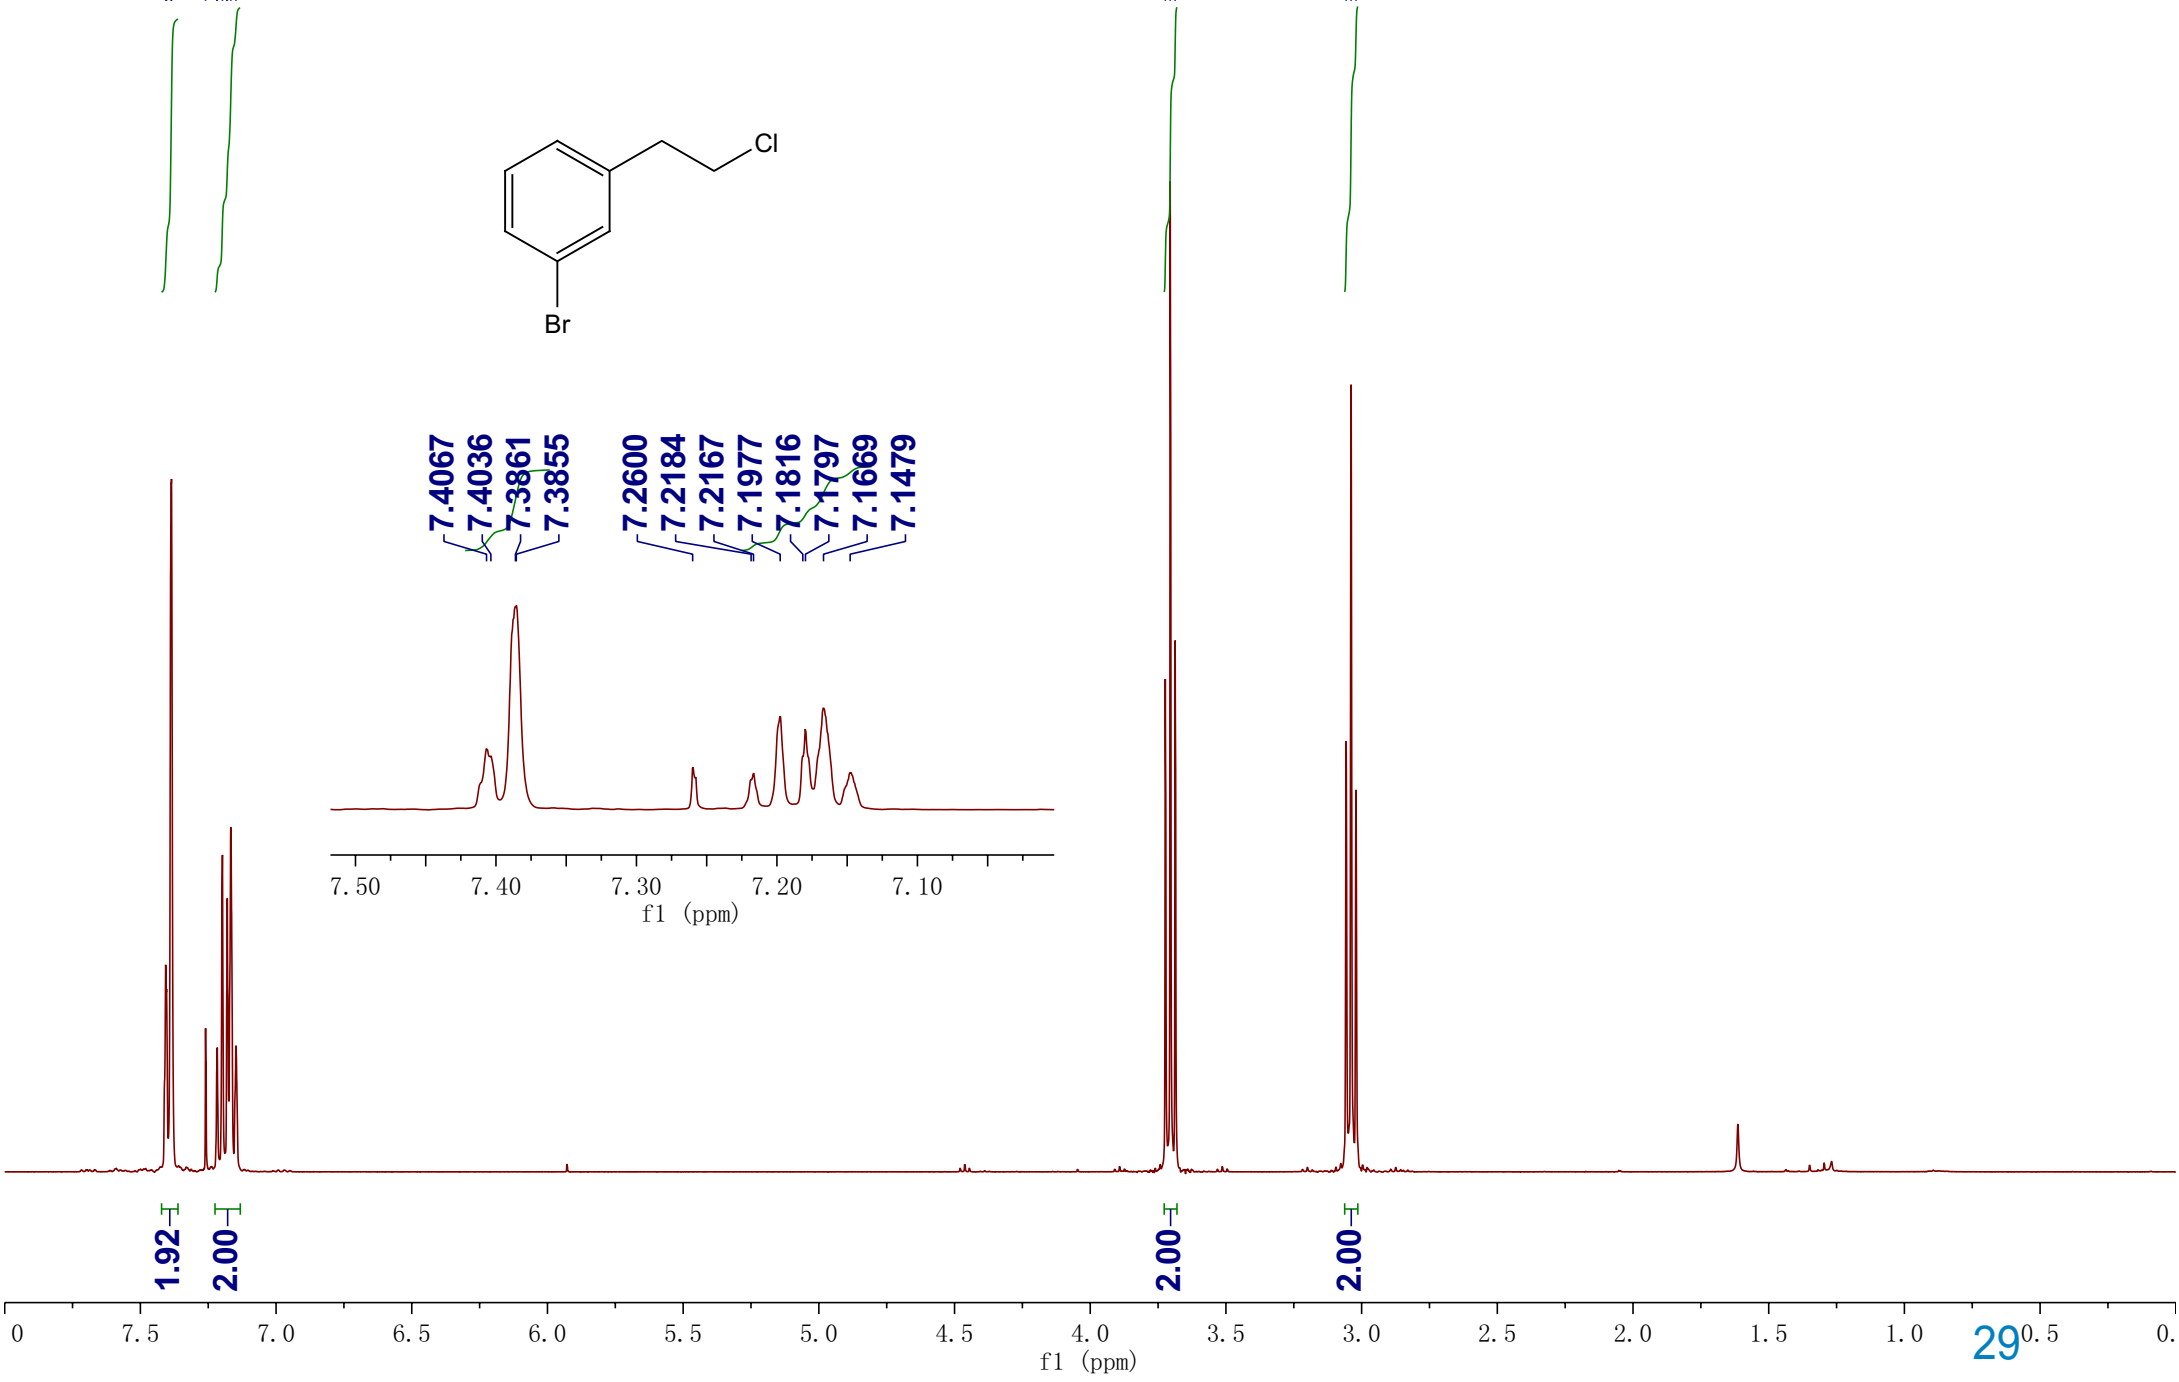

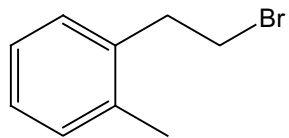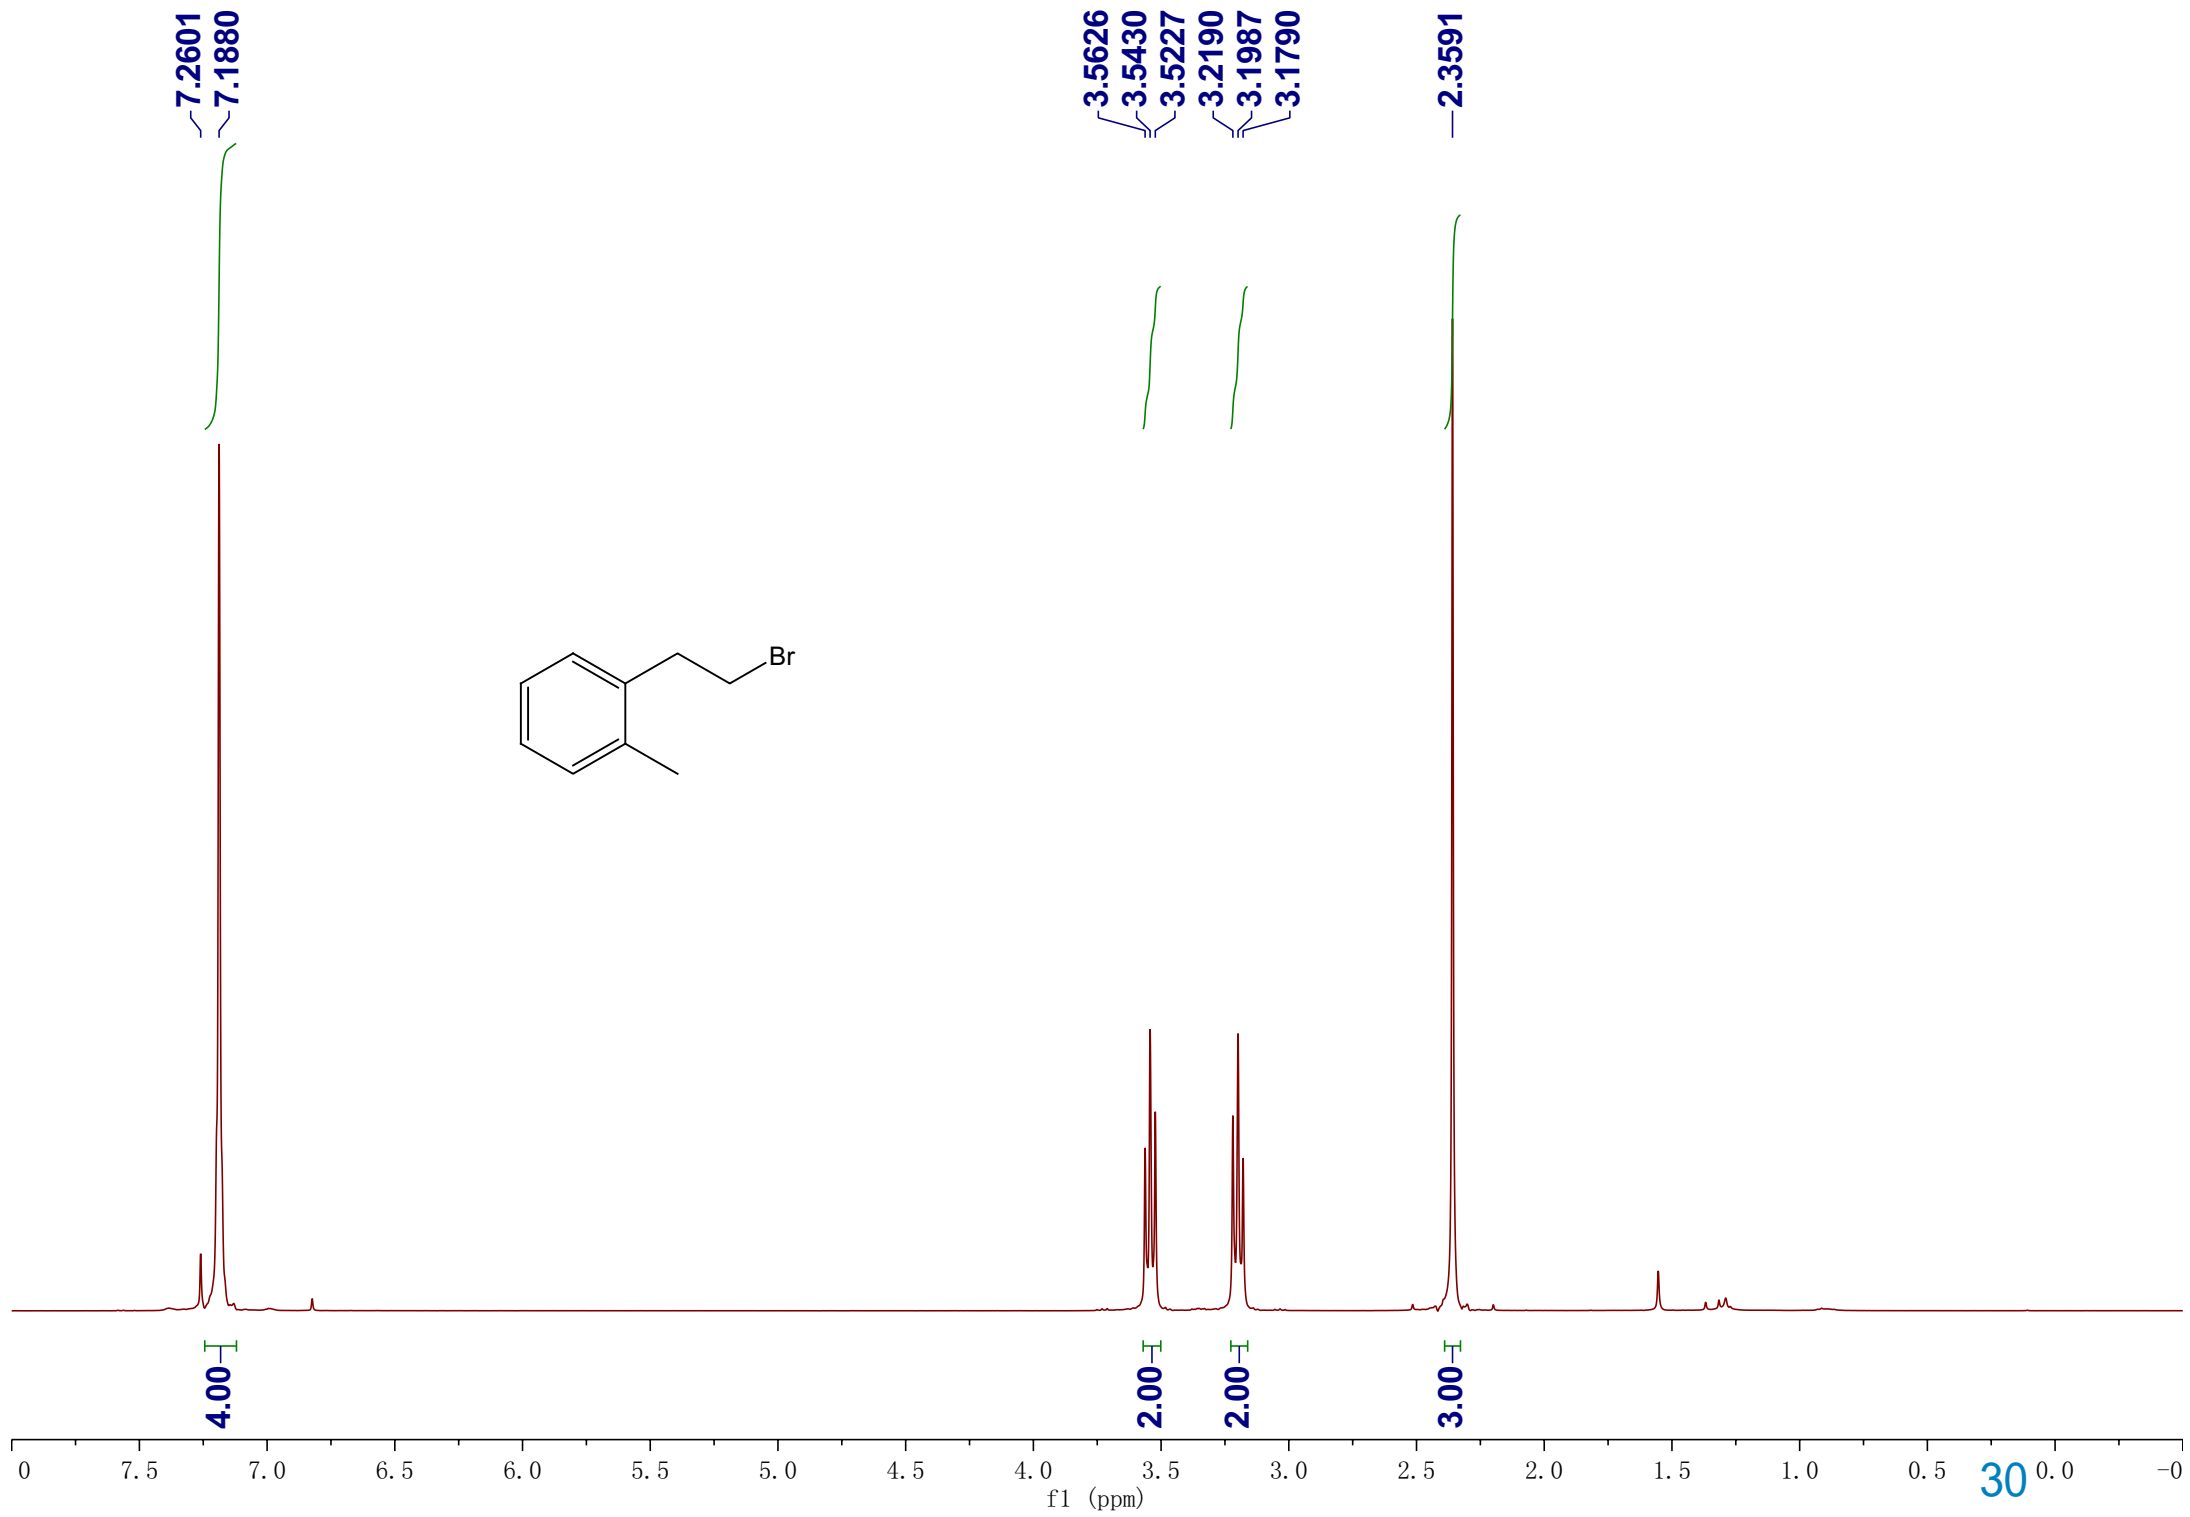

7.2601  
7.2523  
7.2335  
7.2149  
7.1045  
7.0856  
7.0433  
7.0217

3.5947  
3.5754  
3.5561  
3.1656  
3.1462  
3.1270

2.3670

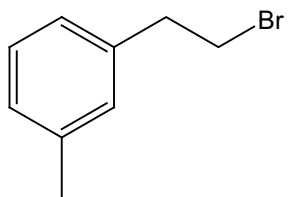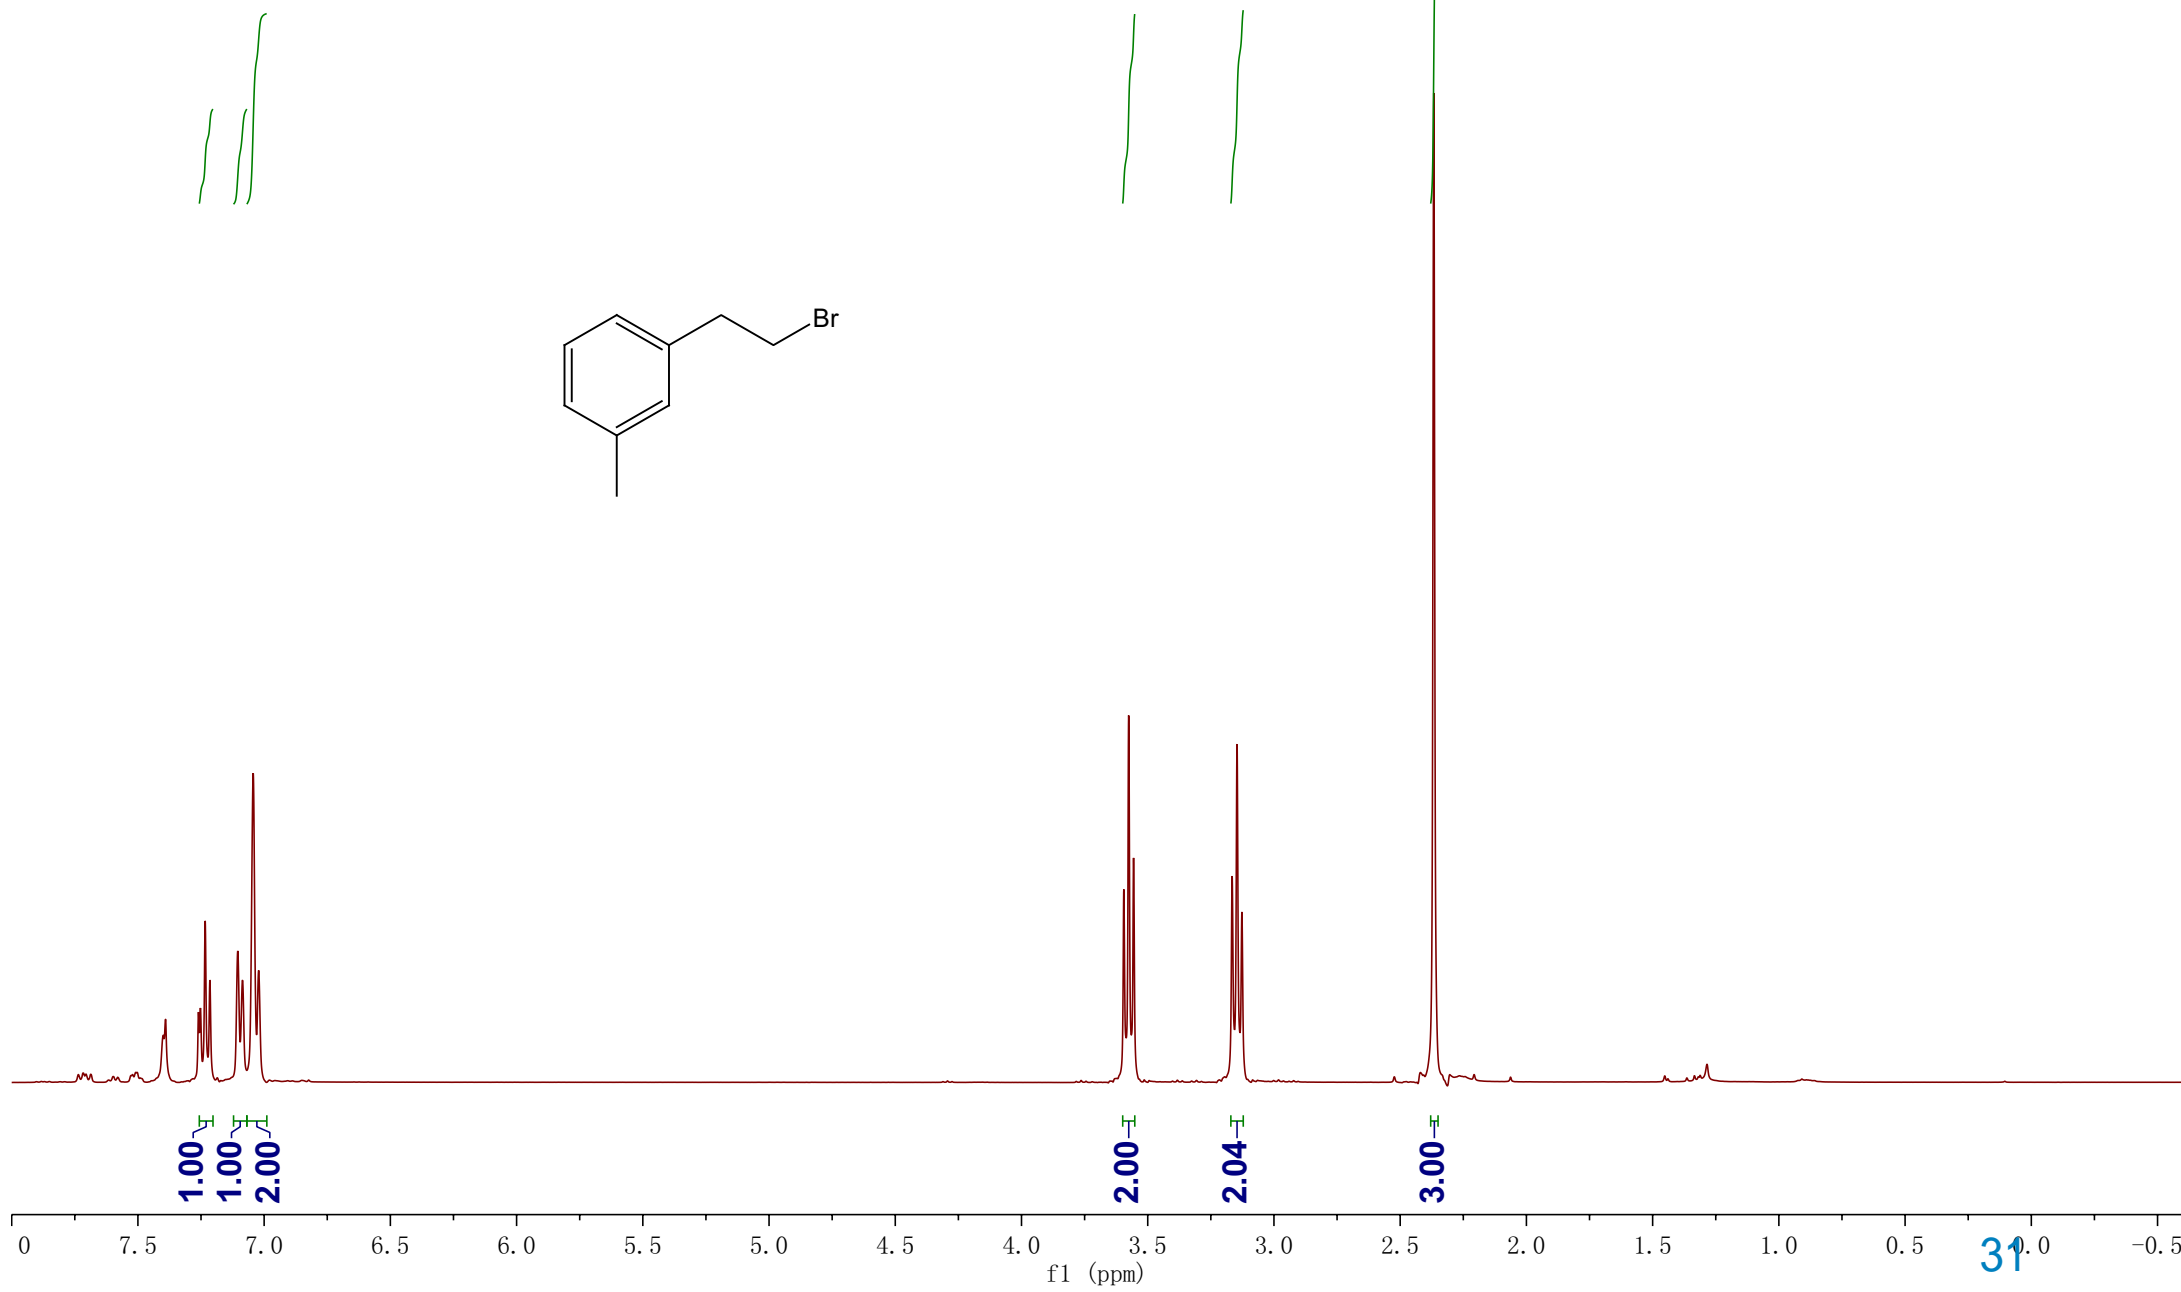



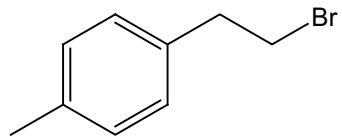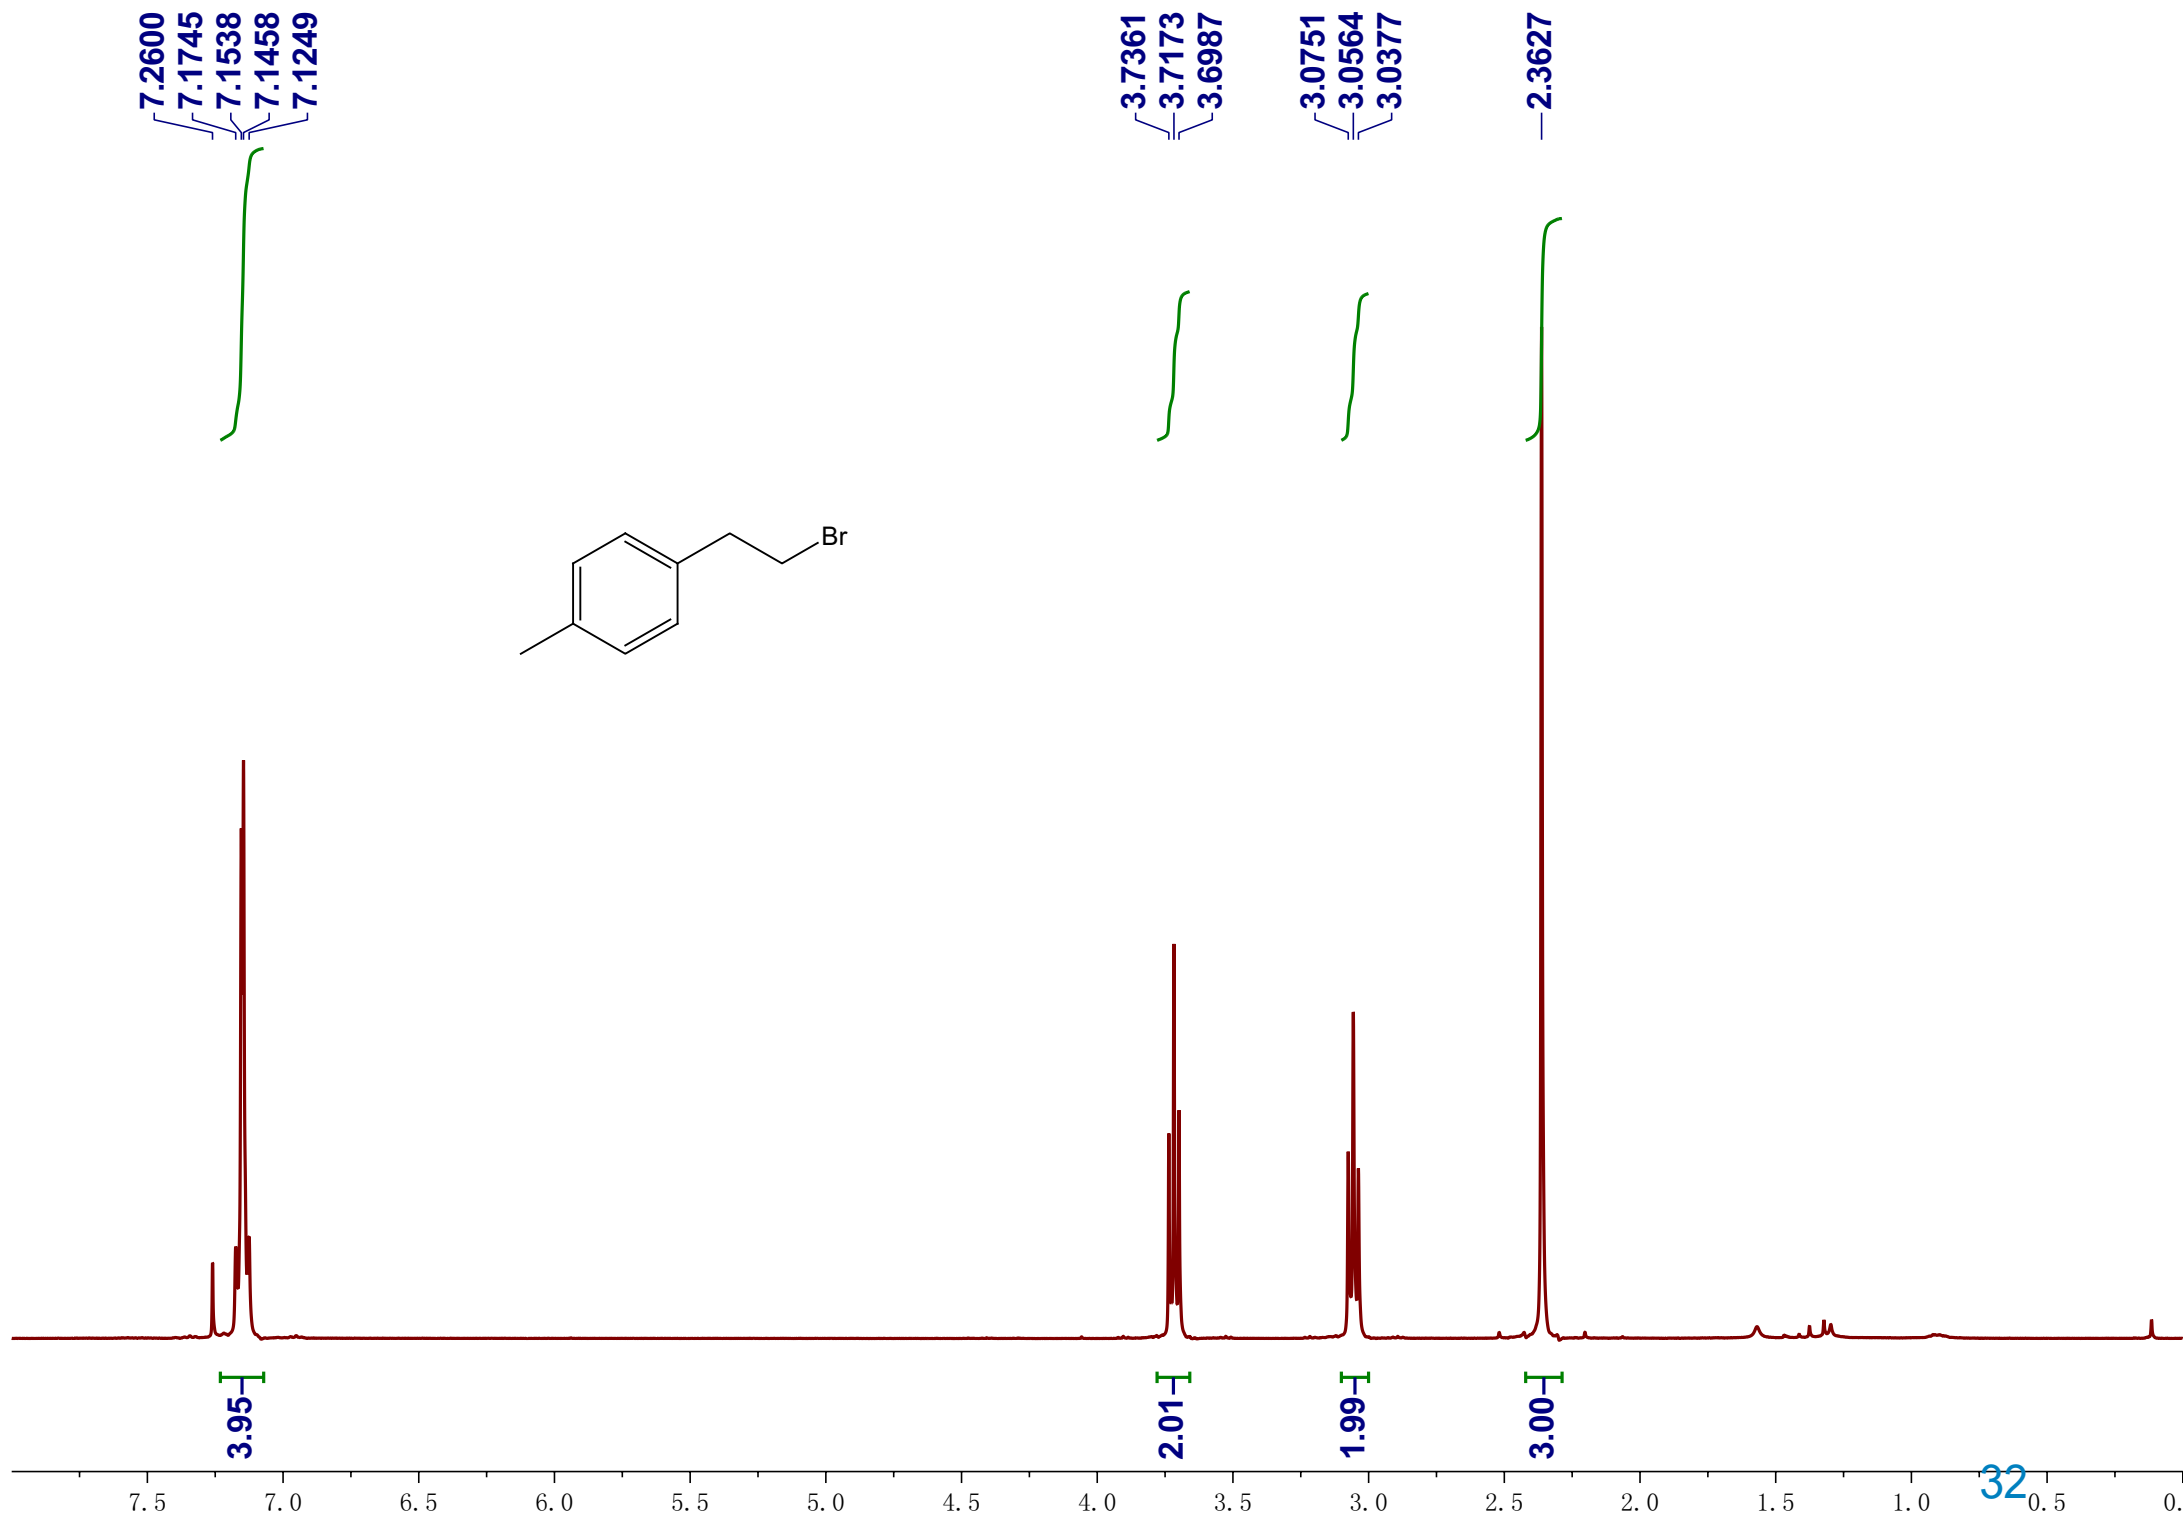

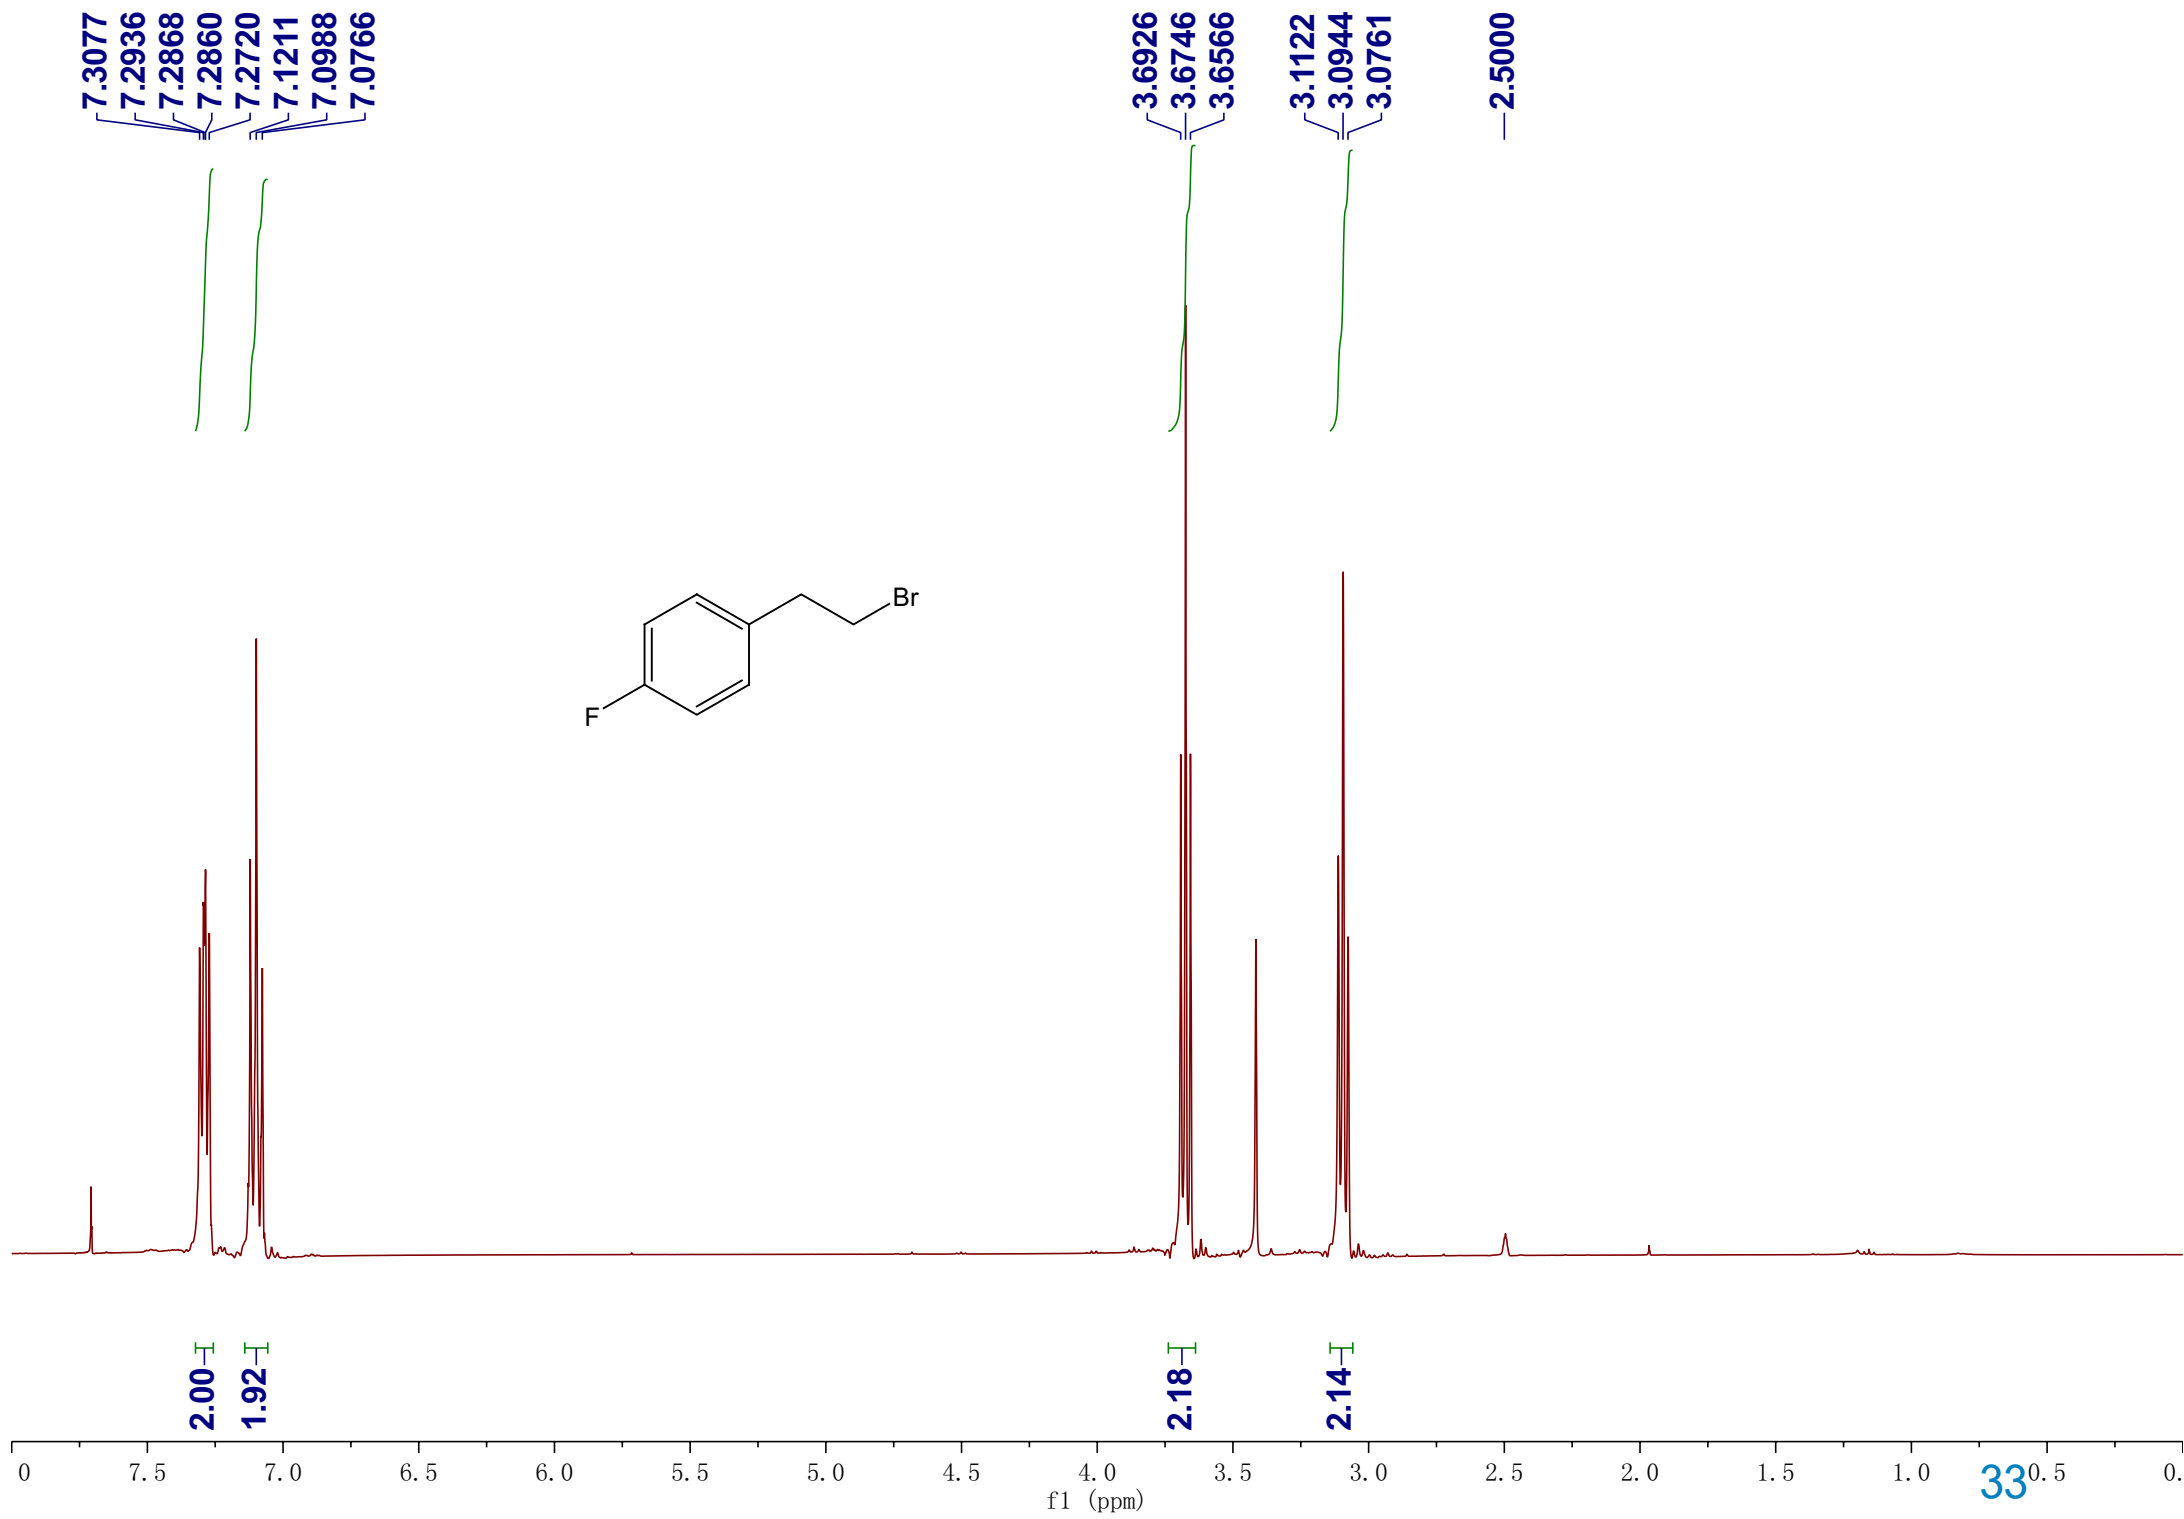

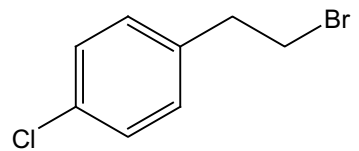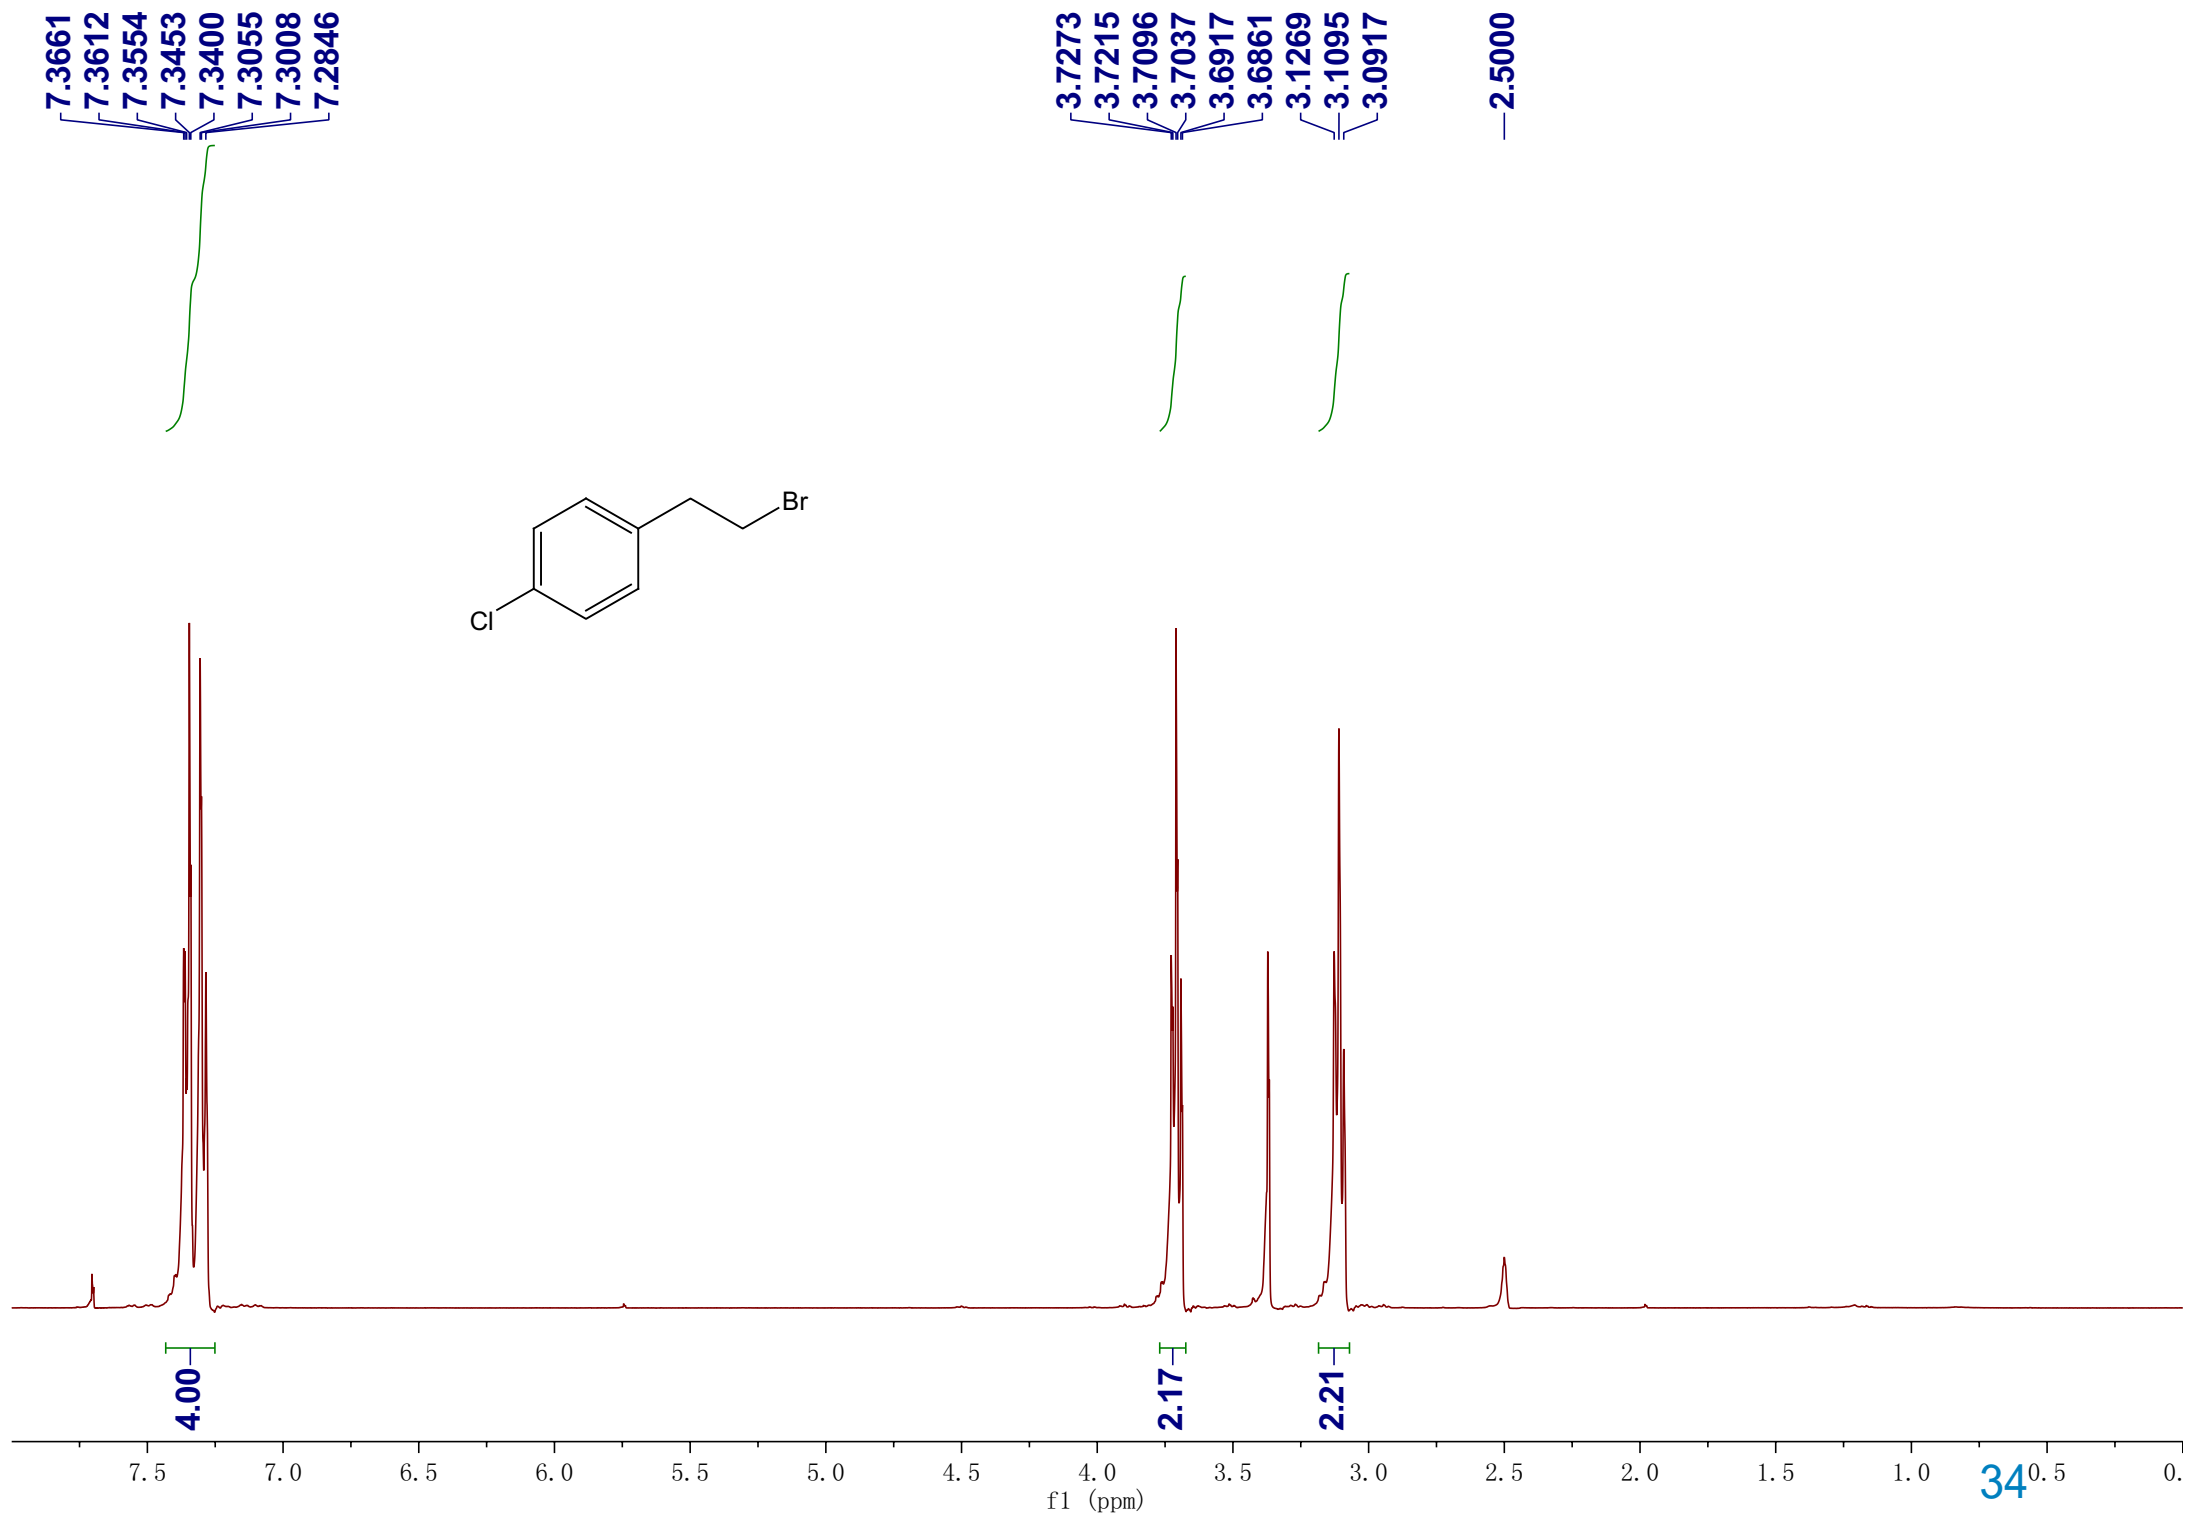

7.4098  
7.3905  
7.3770  
7.3744  
7.2604  
7.2172  
7.1982  
7.1789  
7.1569  
7.1379

3.5707  
3.5518  
3.5334  
3.1535  
3.1349  
3.1163

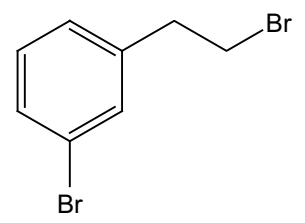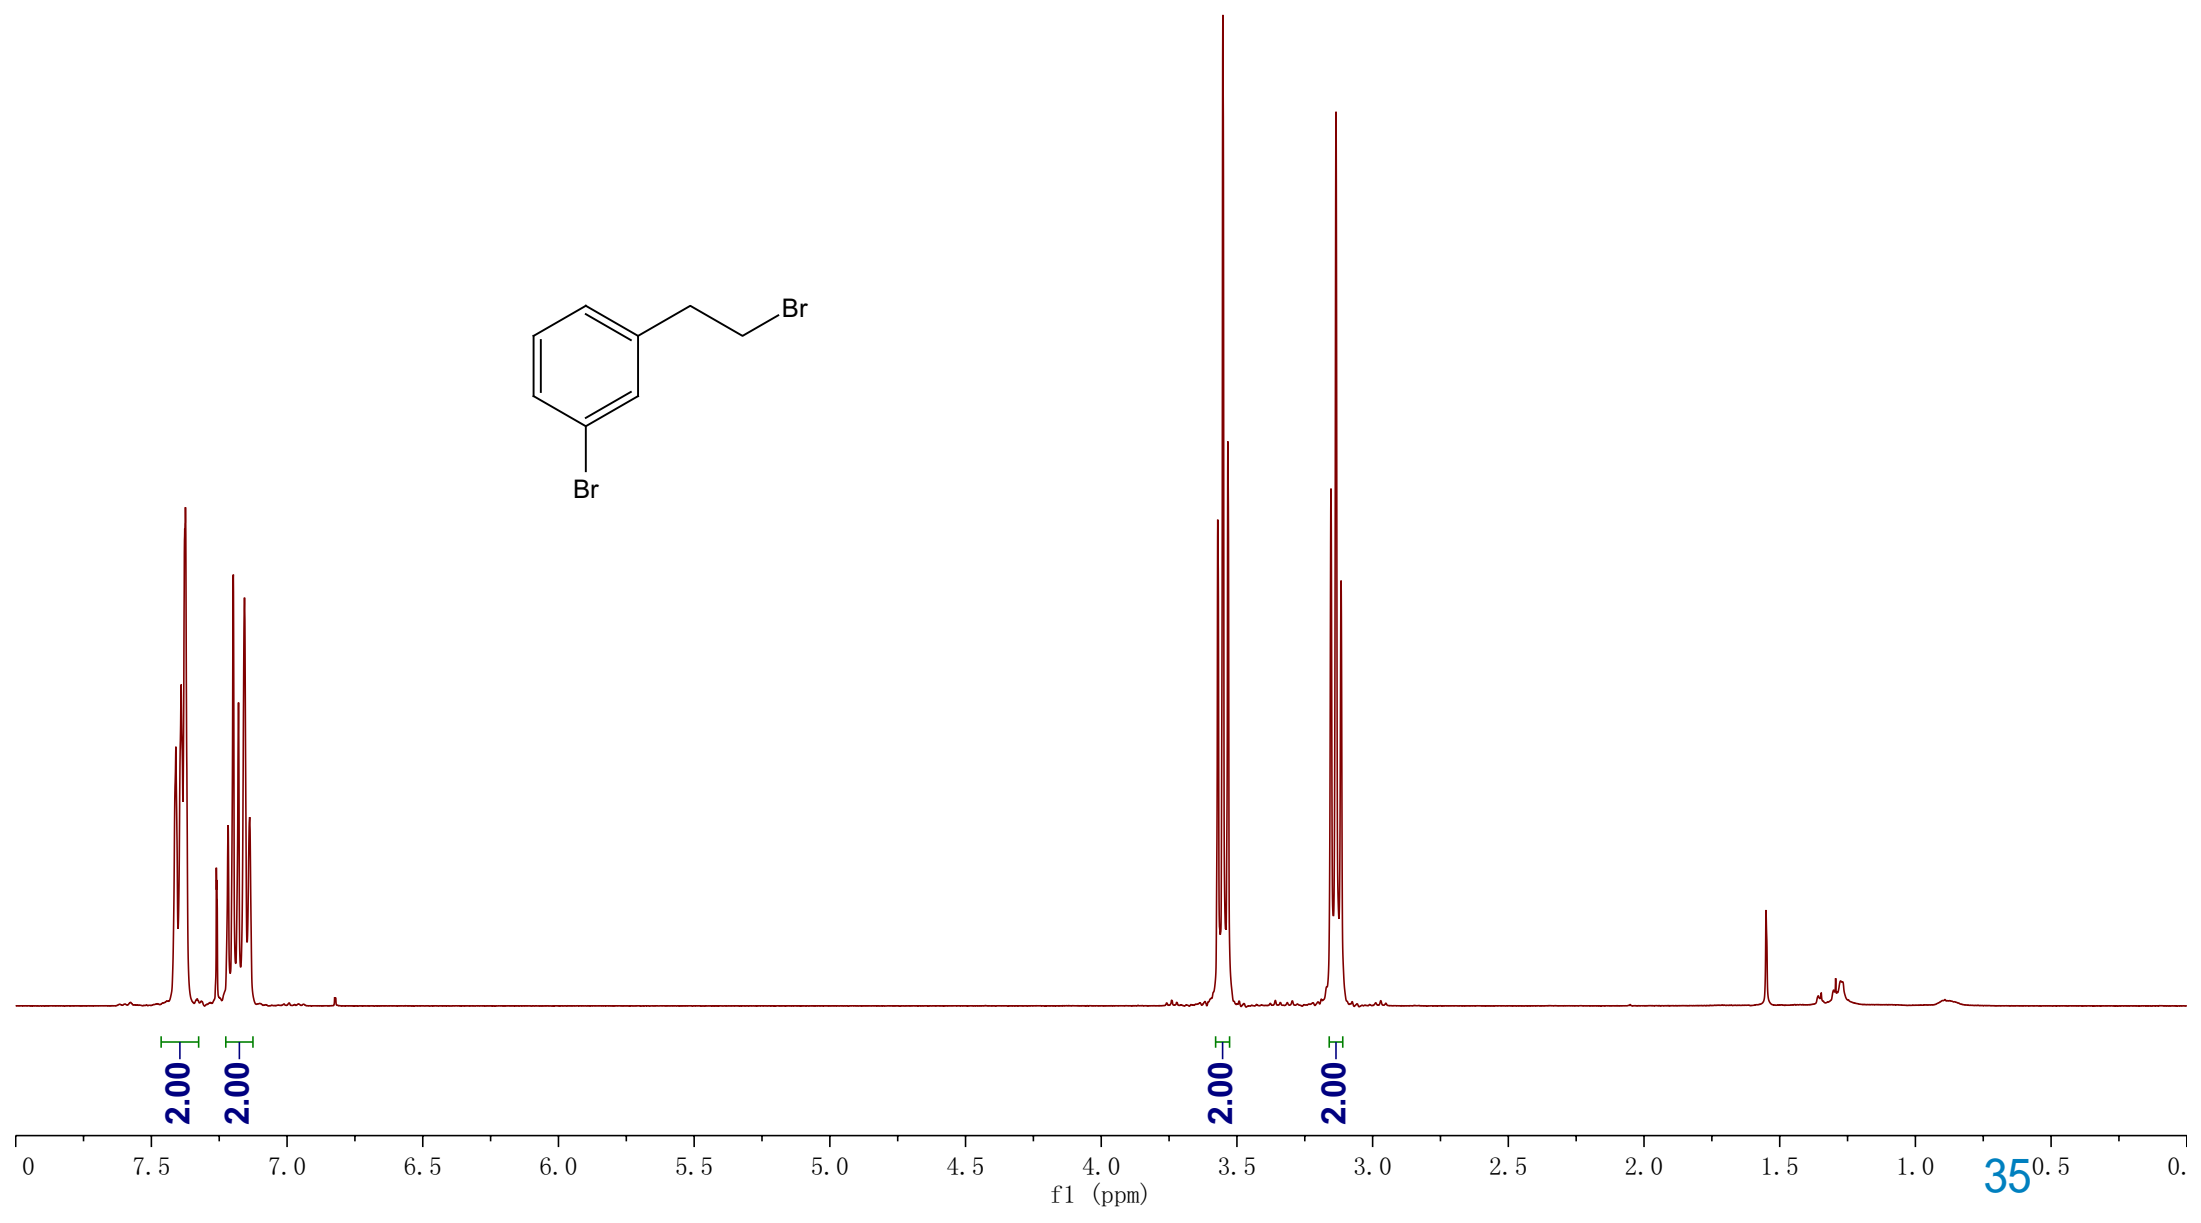

7.5112  
7.5067  
7.4899  
7.2601  
7.2426  
7.2298  
7.2190  
7.2150  
7.1999  
7.1644  
7.1482

5.1033  
5.0958  
5.0807  
5.0731

3.6935  
3.6858  
3.6651  
3.6574  
3.6079  
3.5850  
3.5805  
3.5568

2.6322  
2.3377

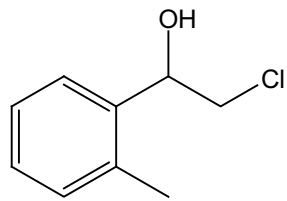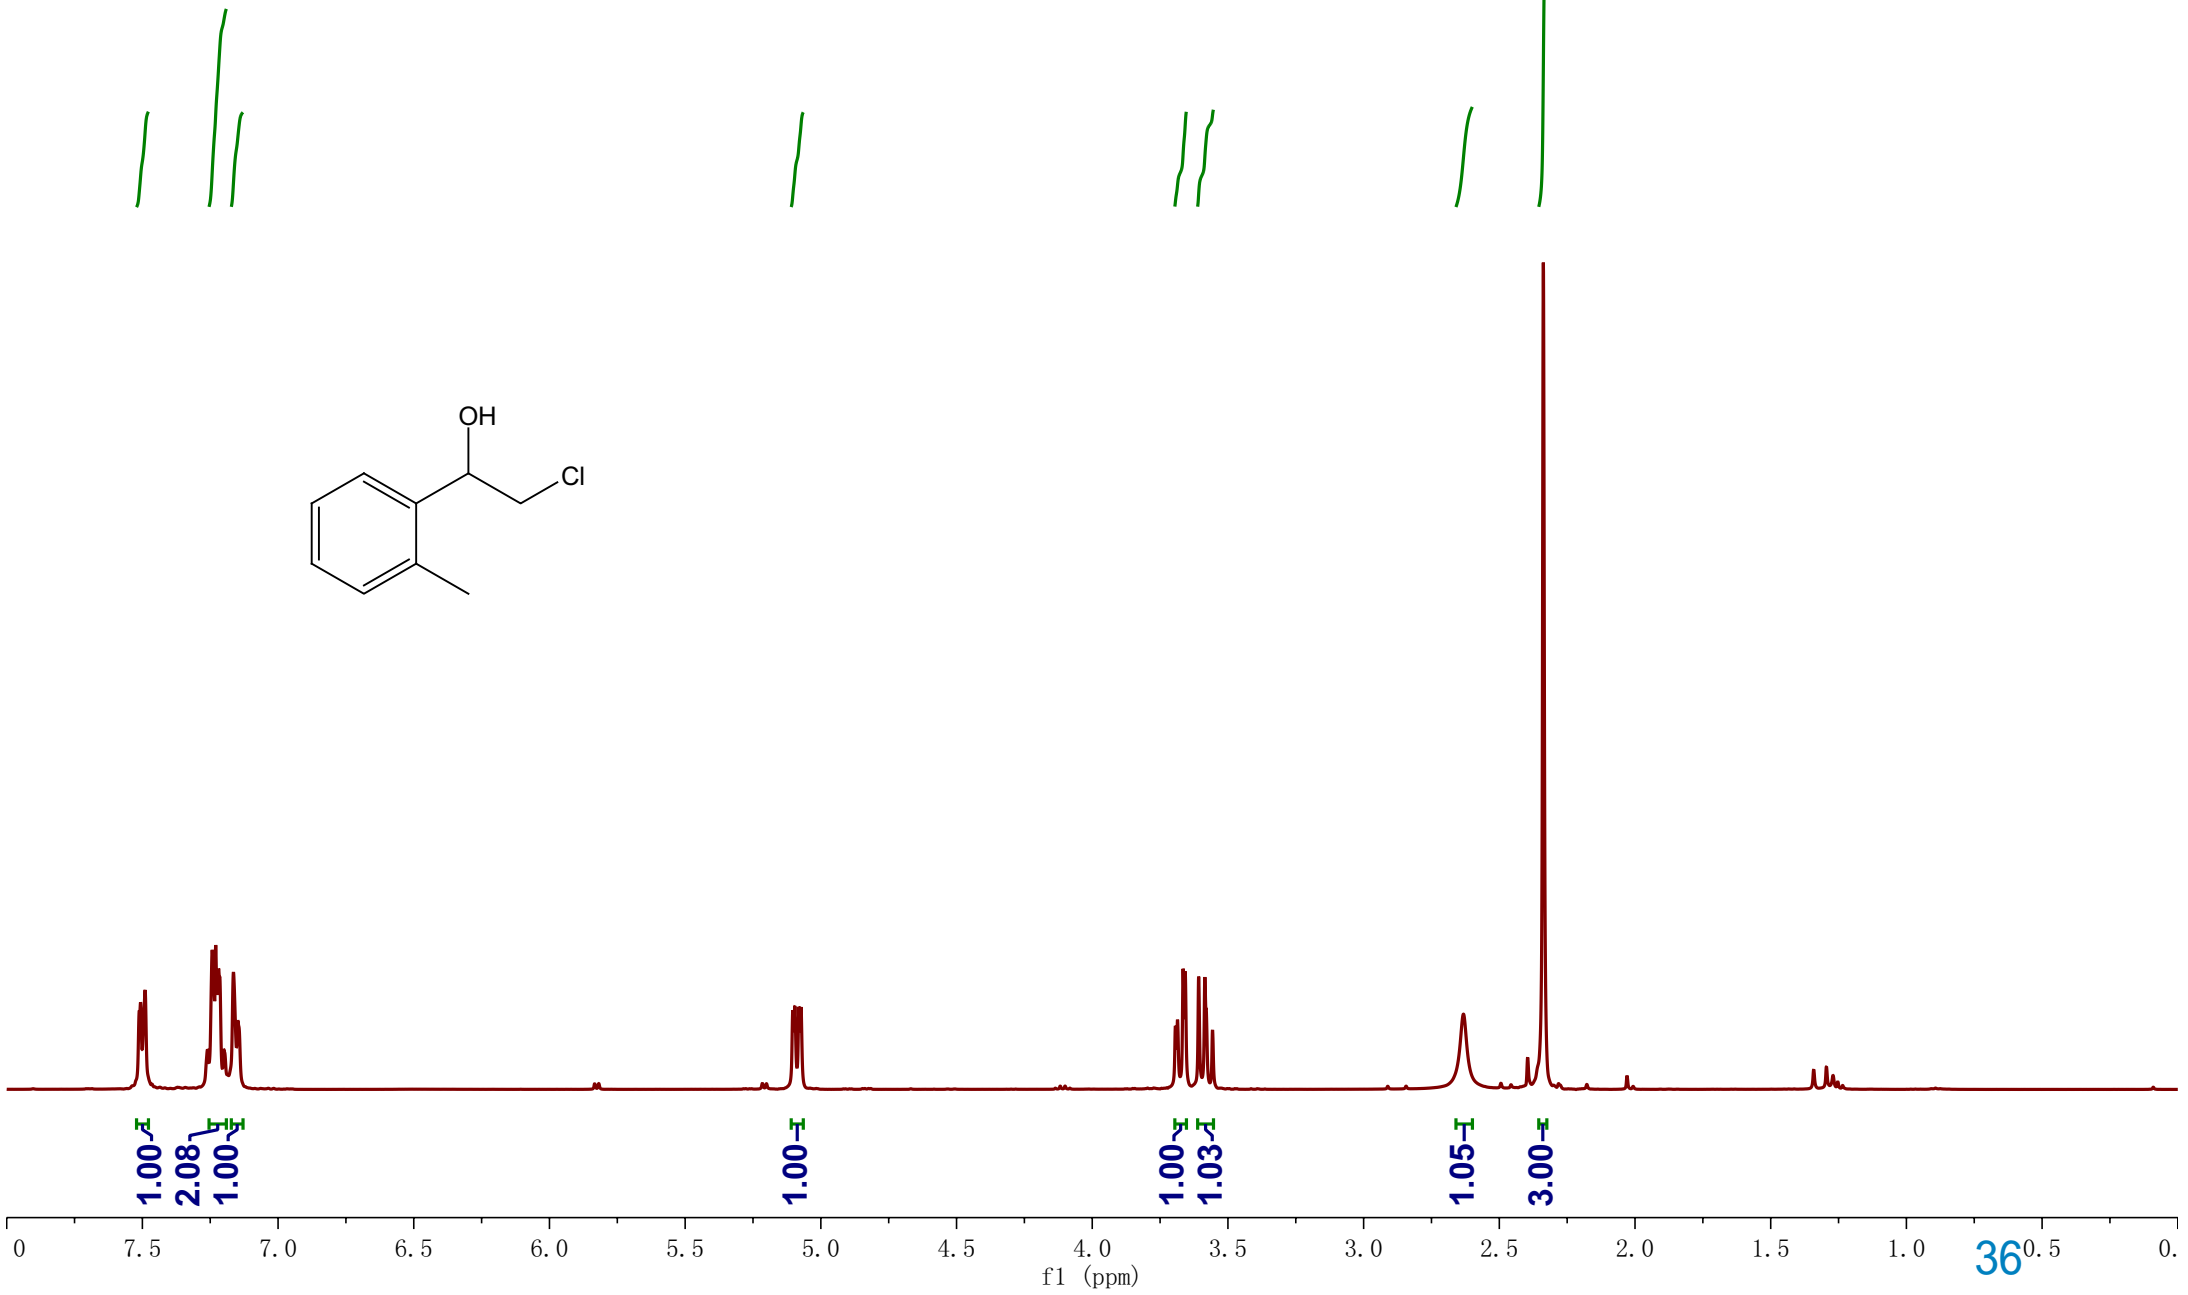

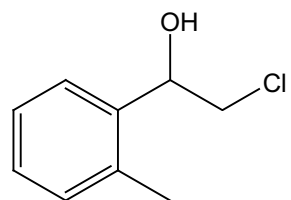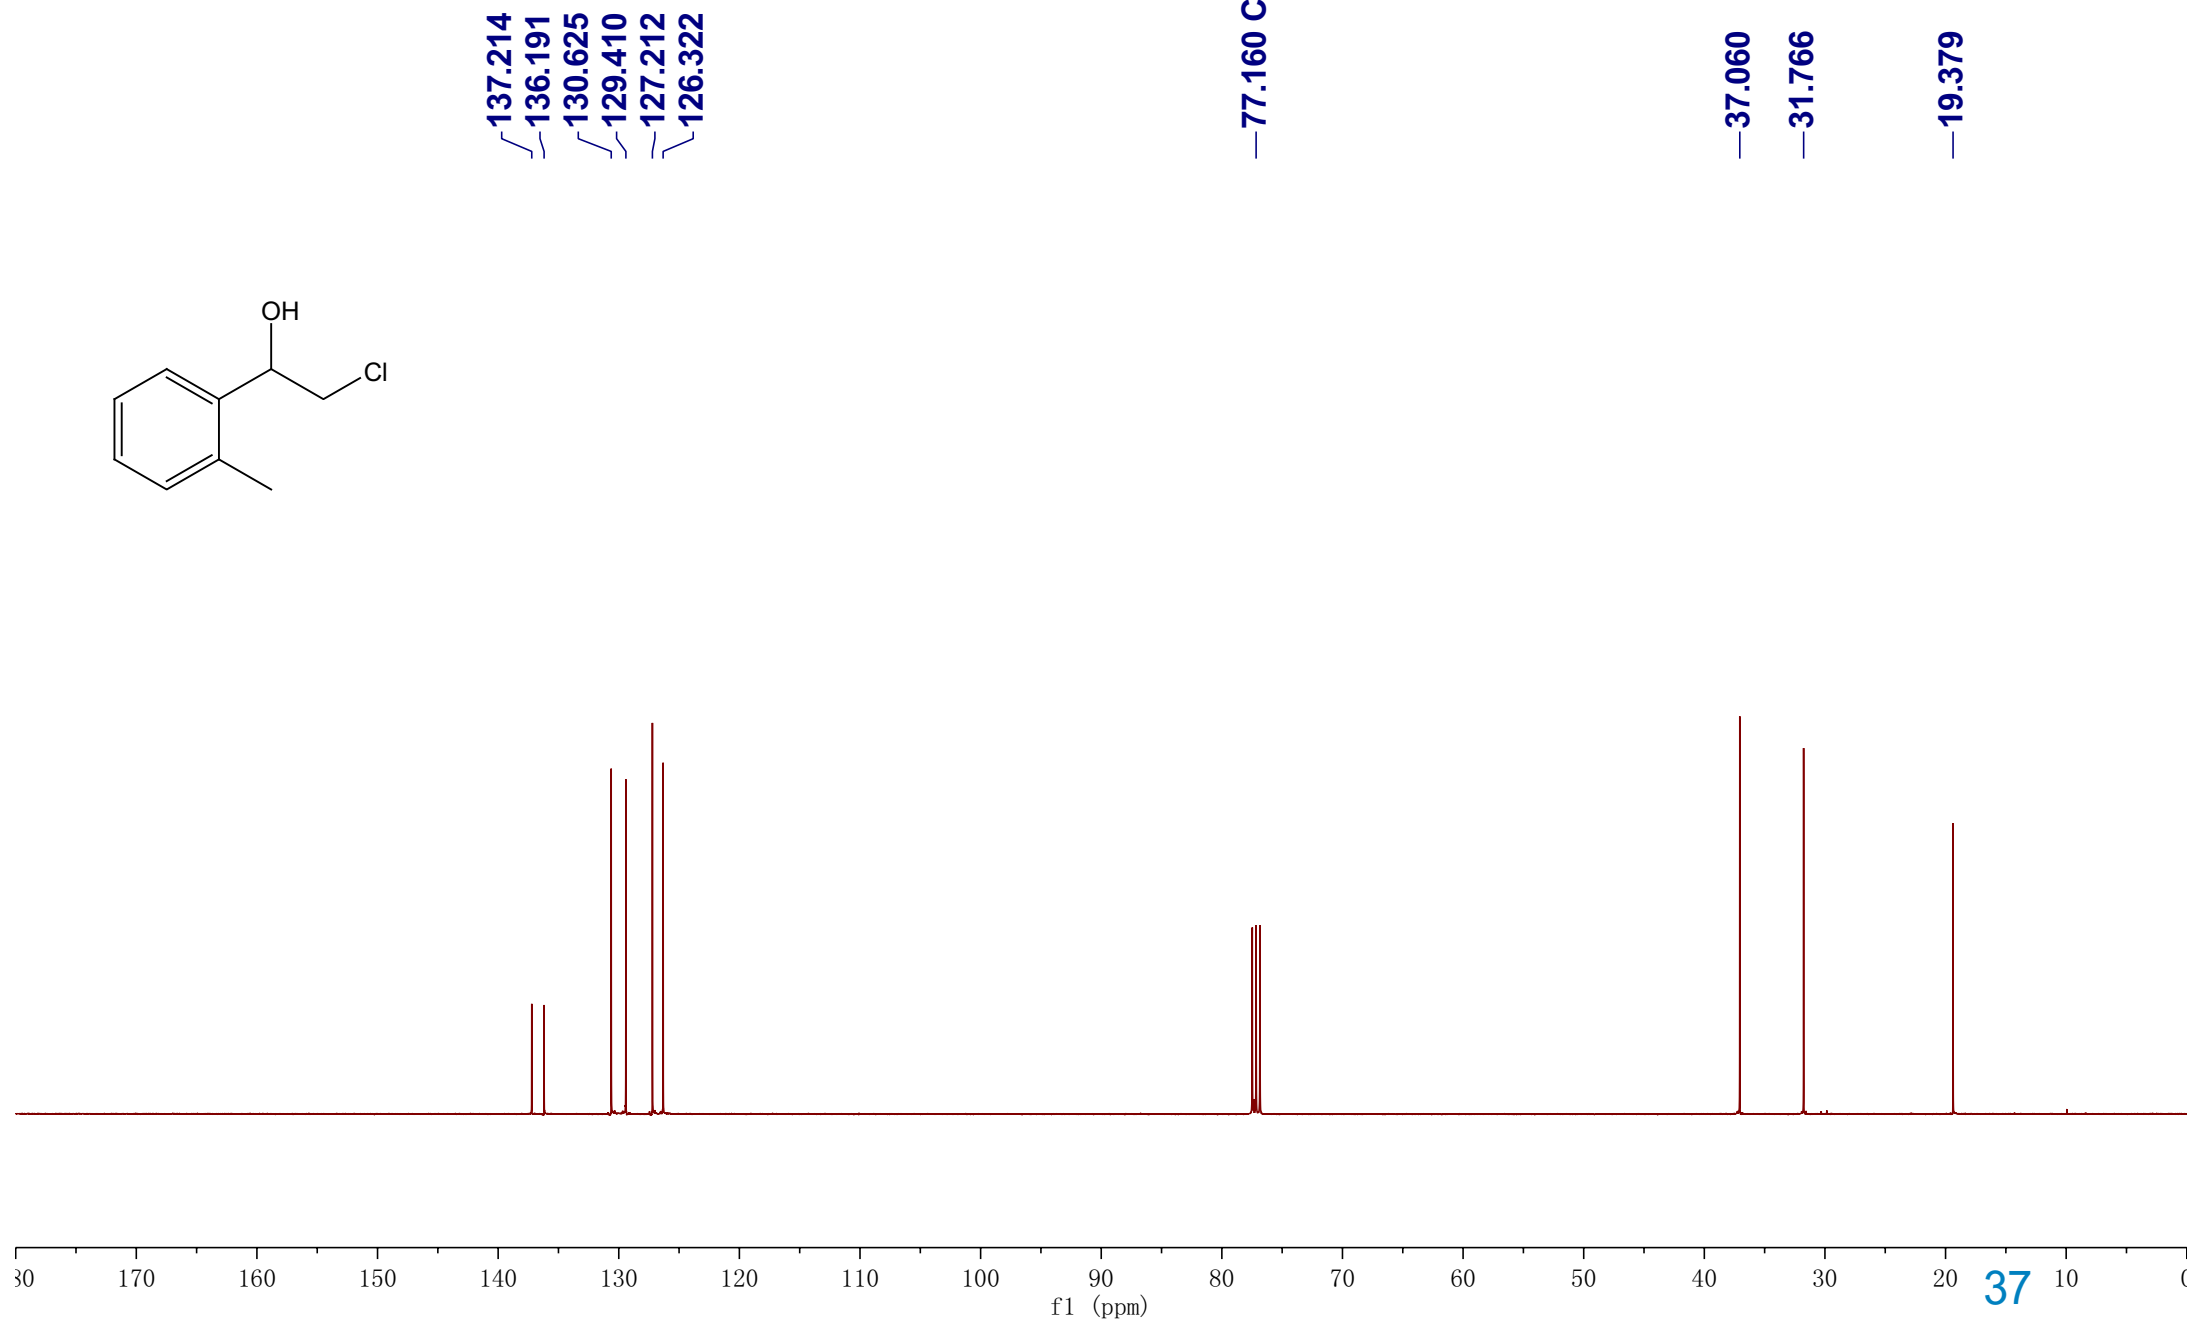

7.2788  
7.2600  
7.2413  
7.1942  
7.1701  
7.1484  
7.1280

4.8568  
4.8485  
4.8349  
4.8266

3.7342  
3.7257  
3.7061  
3.6976  
3.6544  
3.6324  
3.6266  
3.6044

2.6619

2.3613

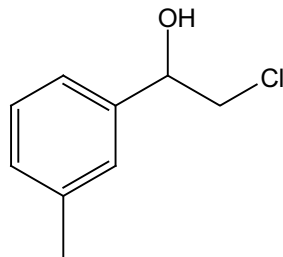

3.7342  
3.7257  
3.7061  
3.6976

3.6544  
3.6324  
3.6266  
3.6044

7.2788  
7.2600  
7.2413

7.1942  
7.1701  
7.1484  
7.1280

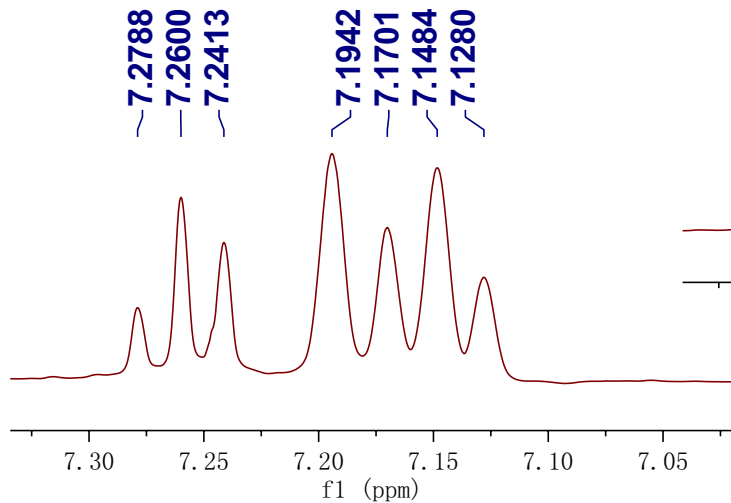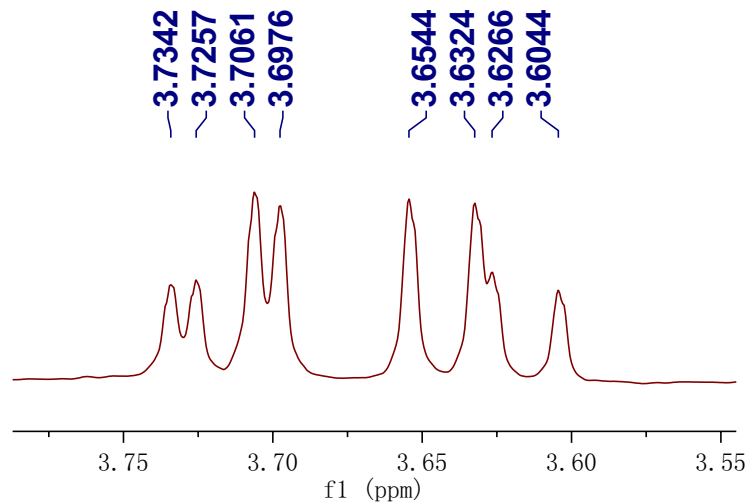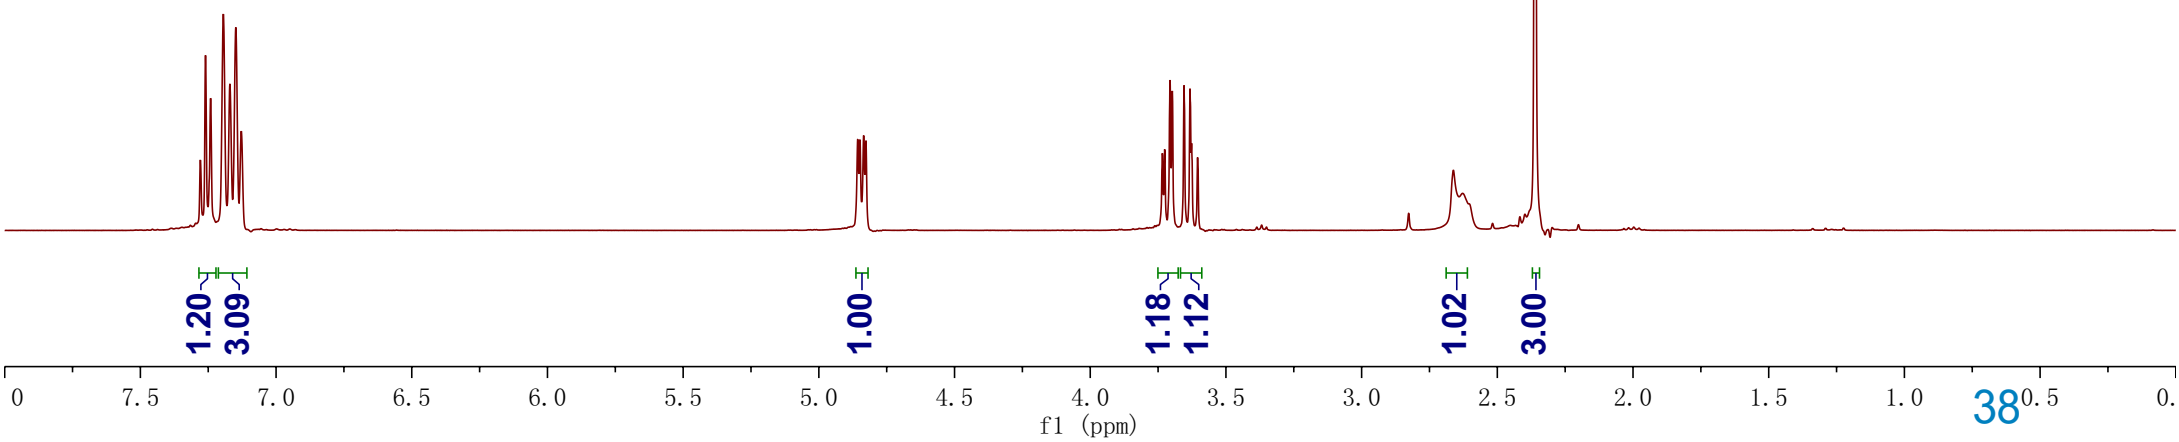

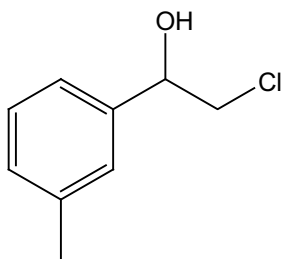

139.967  
138.480

129.284  
128.638  
126.786  
123.226

77.160  
74.195

50.978

21.535

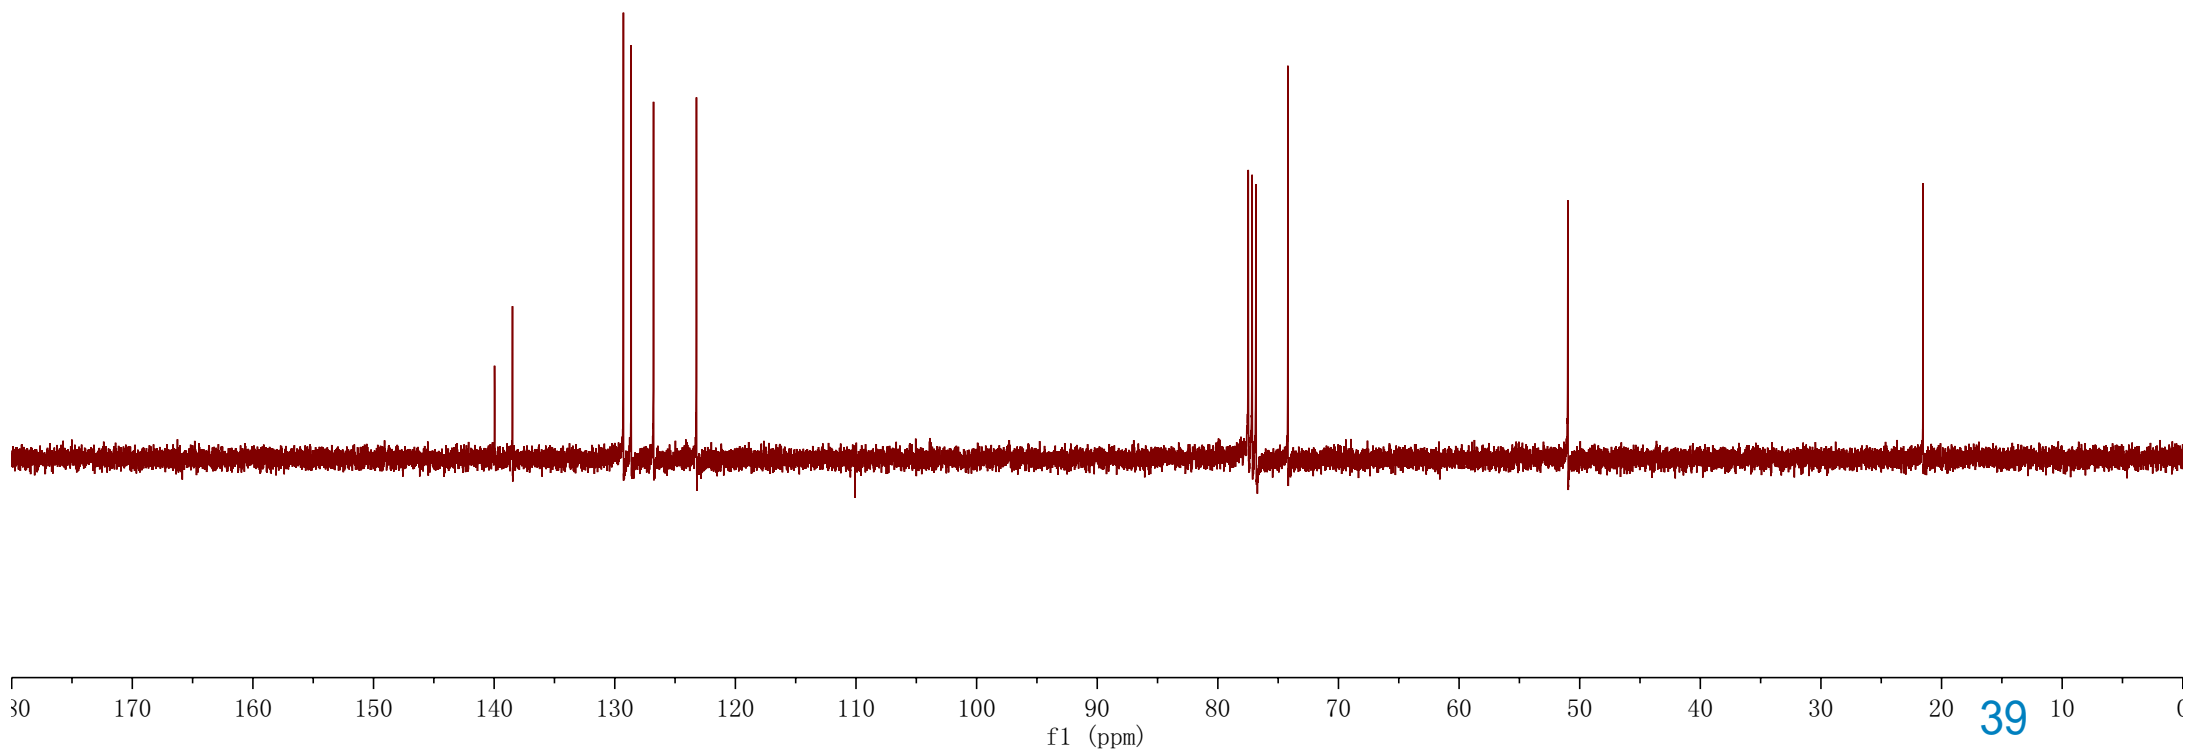



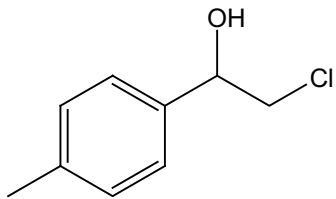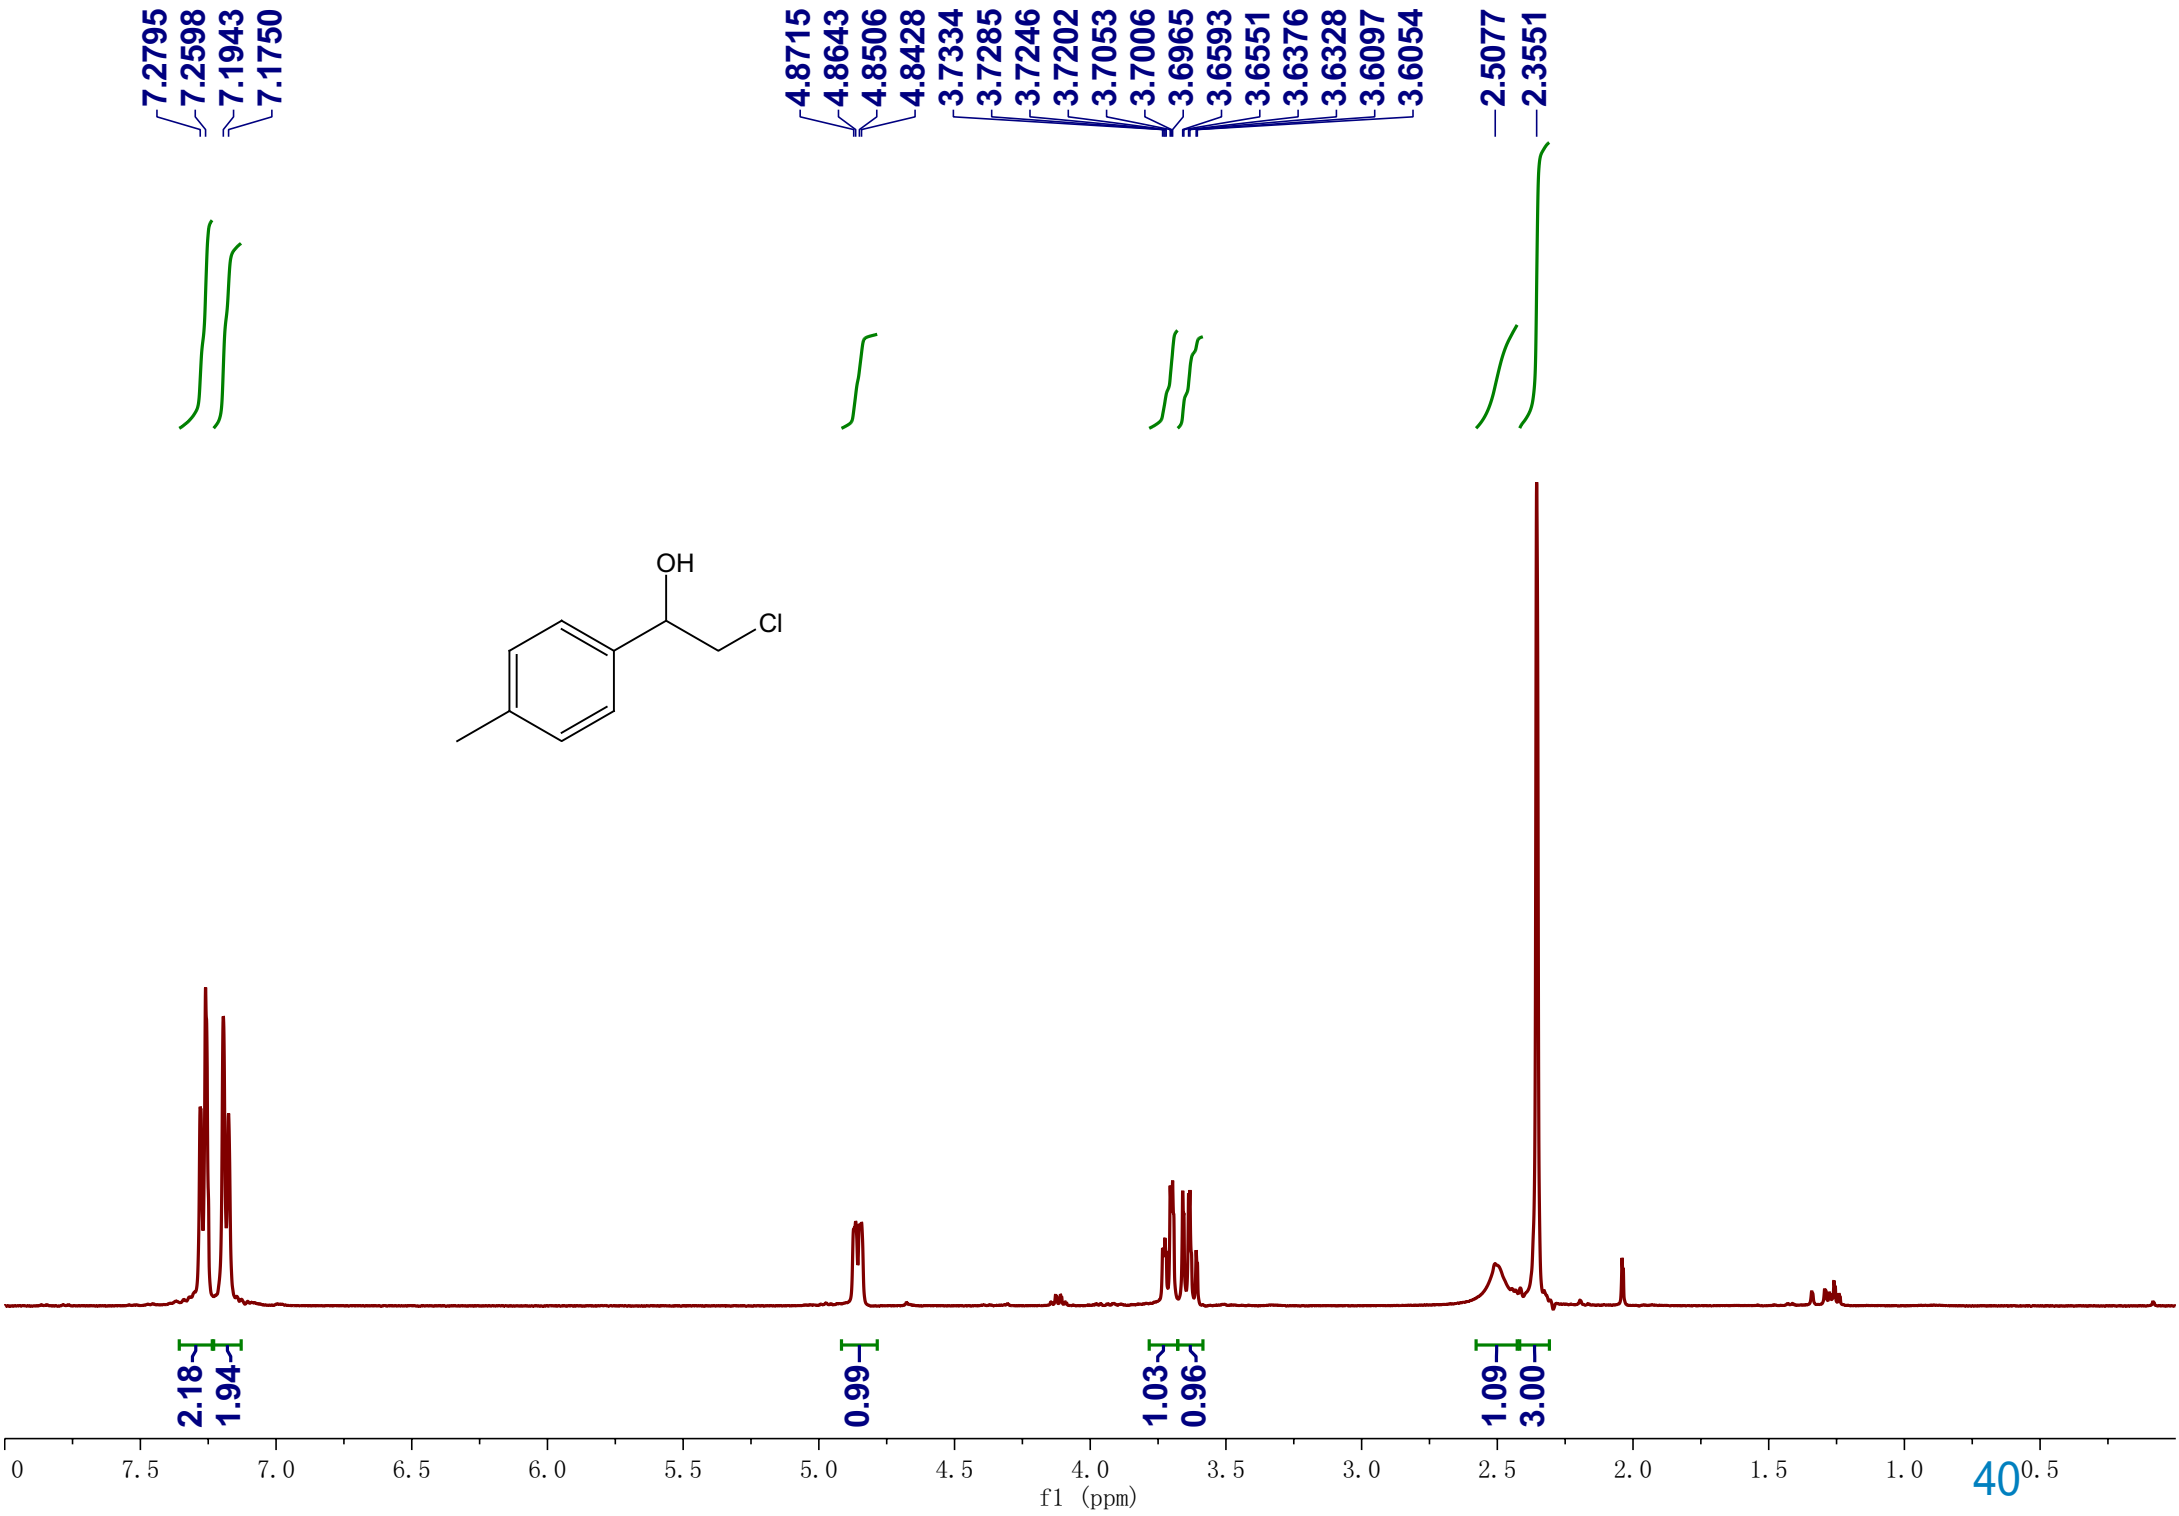

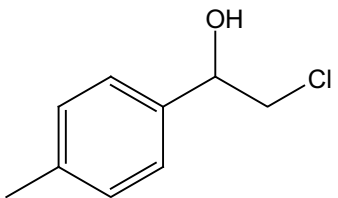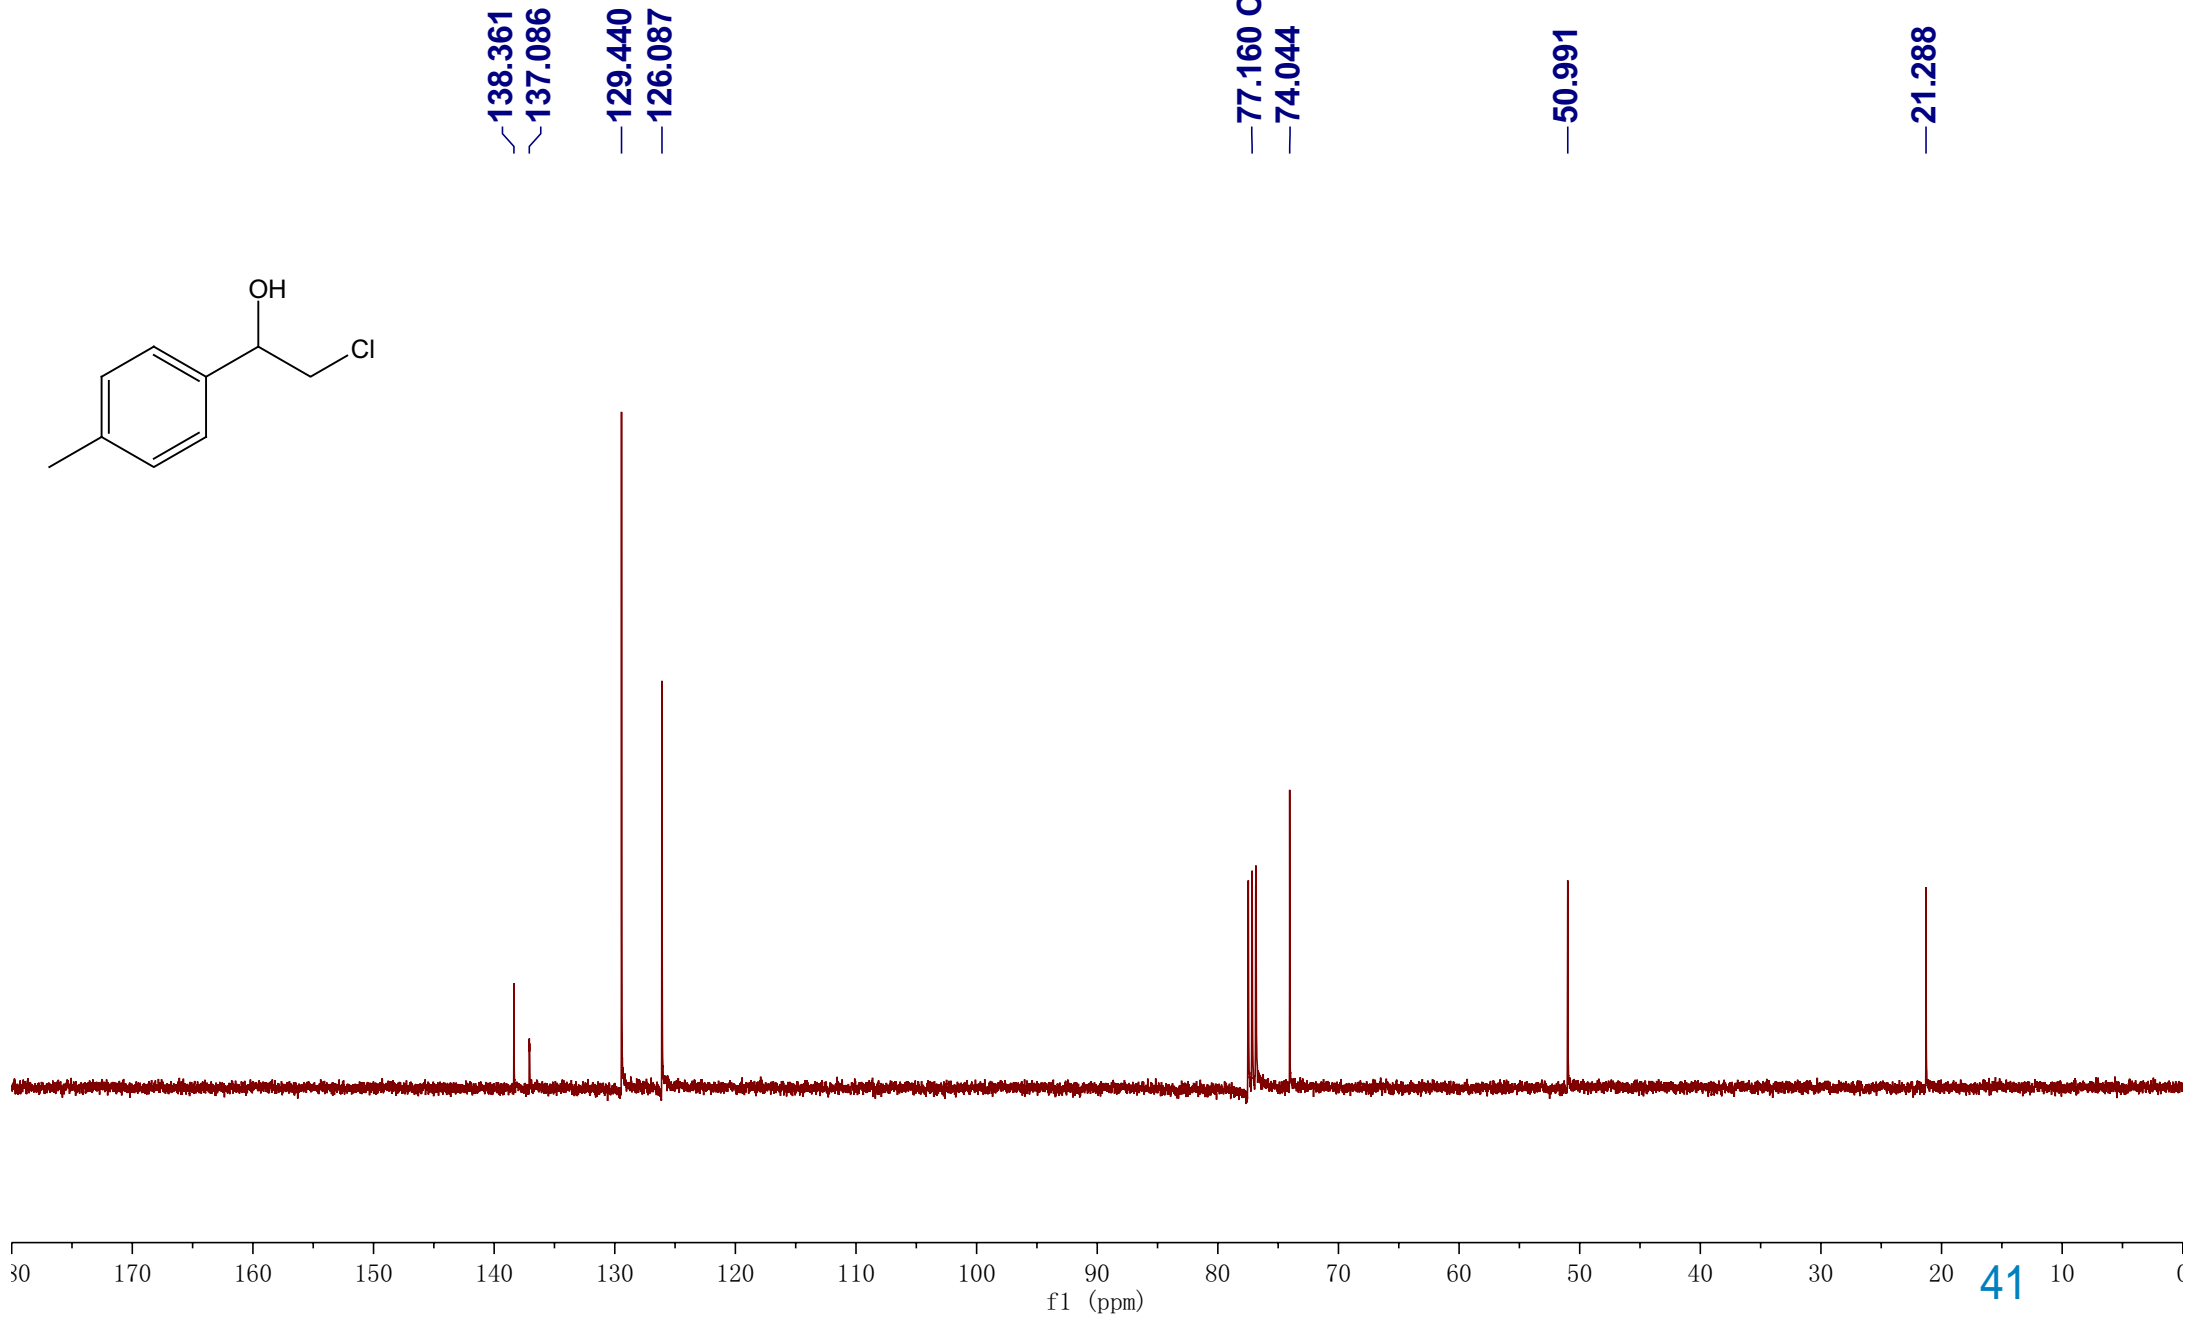

7.3809  
7.3759  
7.3675  
7.3594  
7.3513  
7.3456  
7.2600  
7.0846  
7.0801  
7.0631  
7.0415

4.9006  
4.8922  
4.8788  
4.8703

3.7285  
3.7198  
3.7004  
3.6917  
3.6372  
3.6361  
3.6153  
3.6141  
3.6092  
3.5872  
3.5862

2.7321

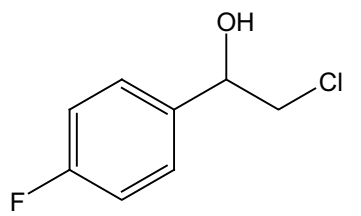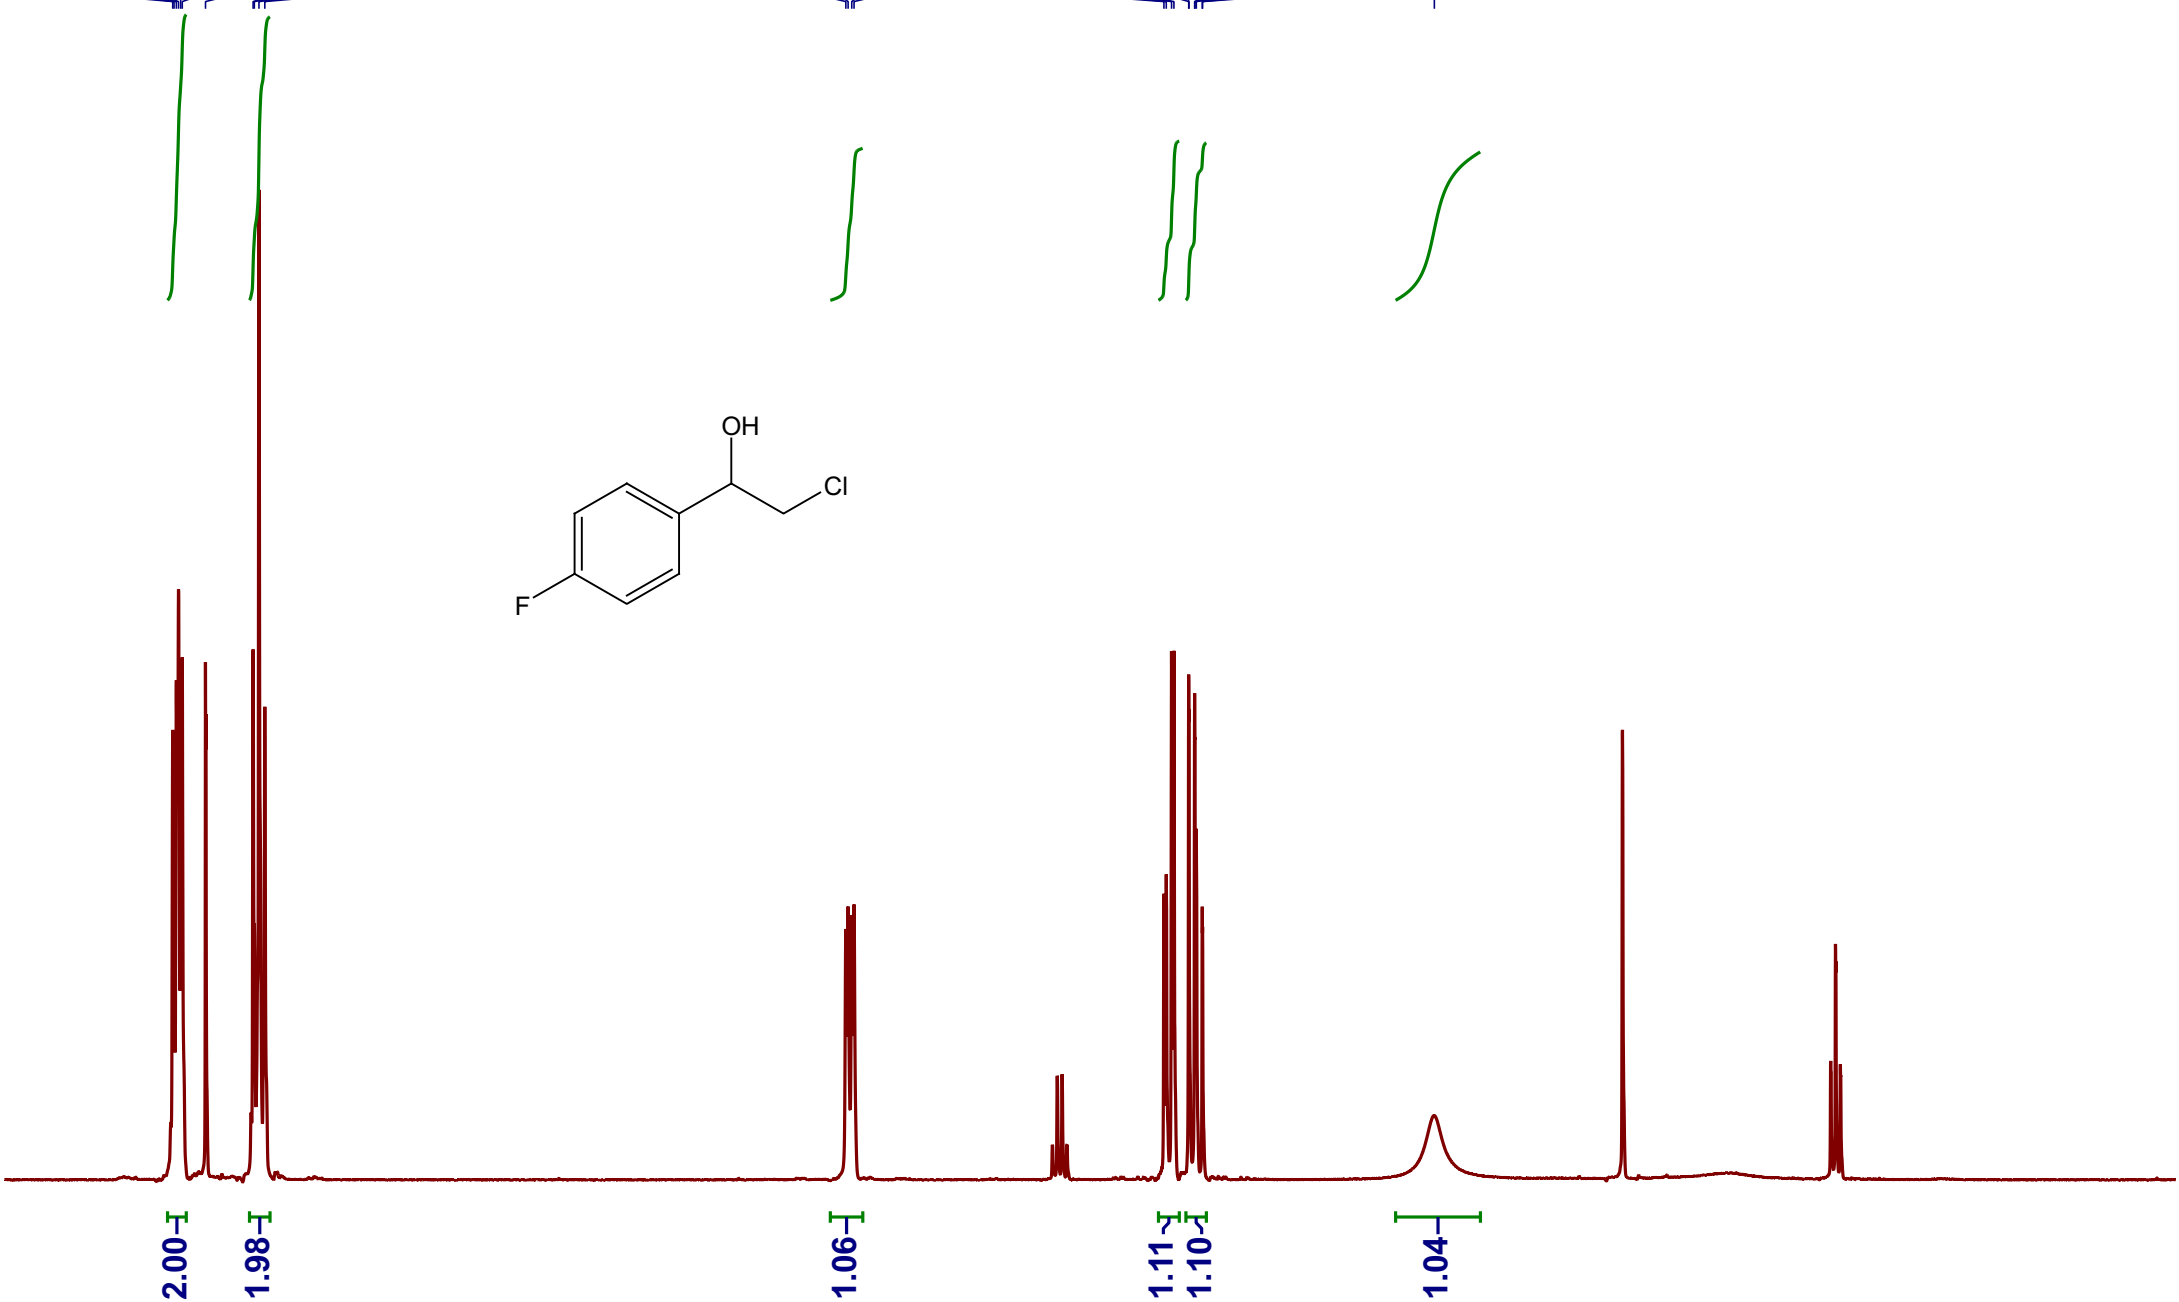

2.00

1.98

1.06

1.11

1.10

1.04

0 7.5 7.0 6.5 6.0 5.5 5.0 4.5 4.0 3.5 3.0 2.5 2.0 1.5 1.0 0.5

f1 (ppm)

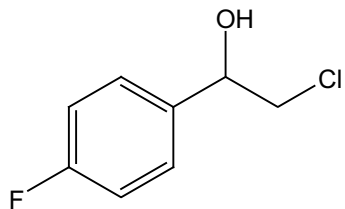

~163.67  
~161.22

135.93  
135.90

127.85  
127.77

115.45  
115.24

77.16 Chloroform-d  
73.25

50.18

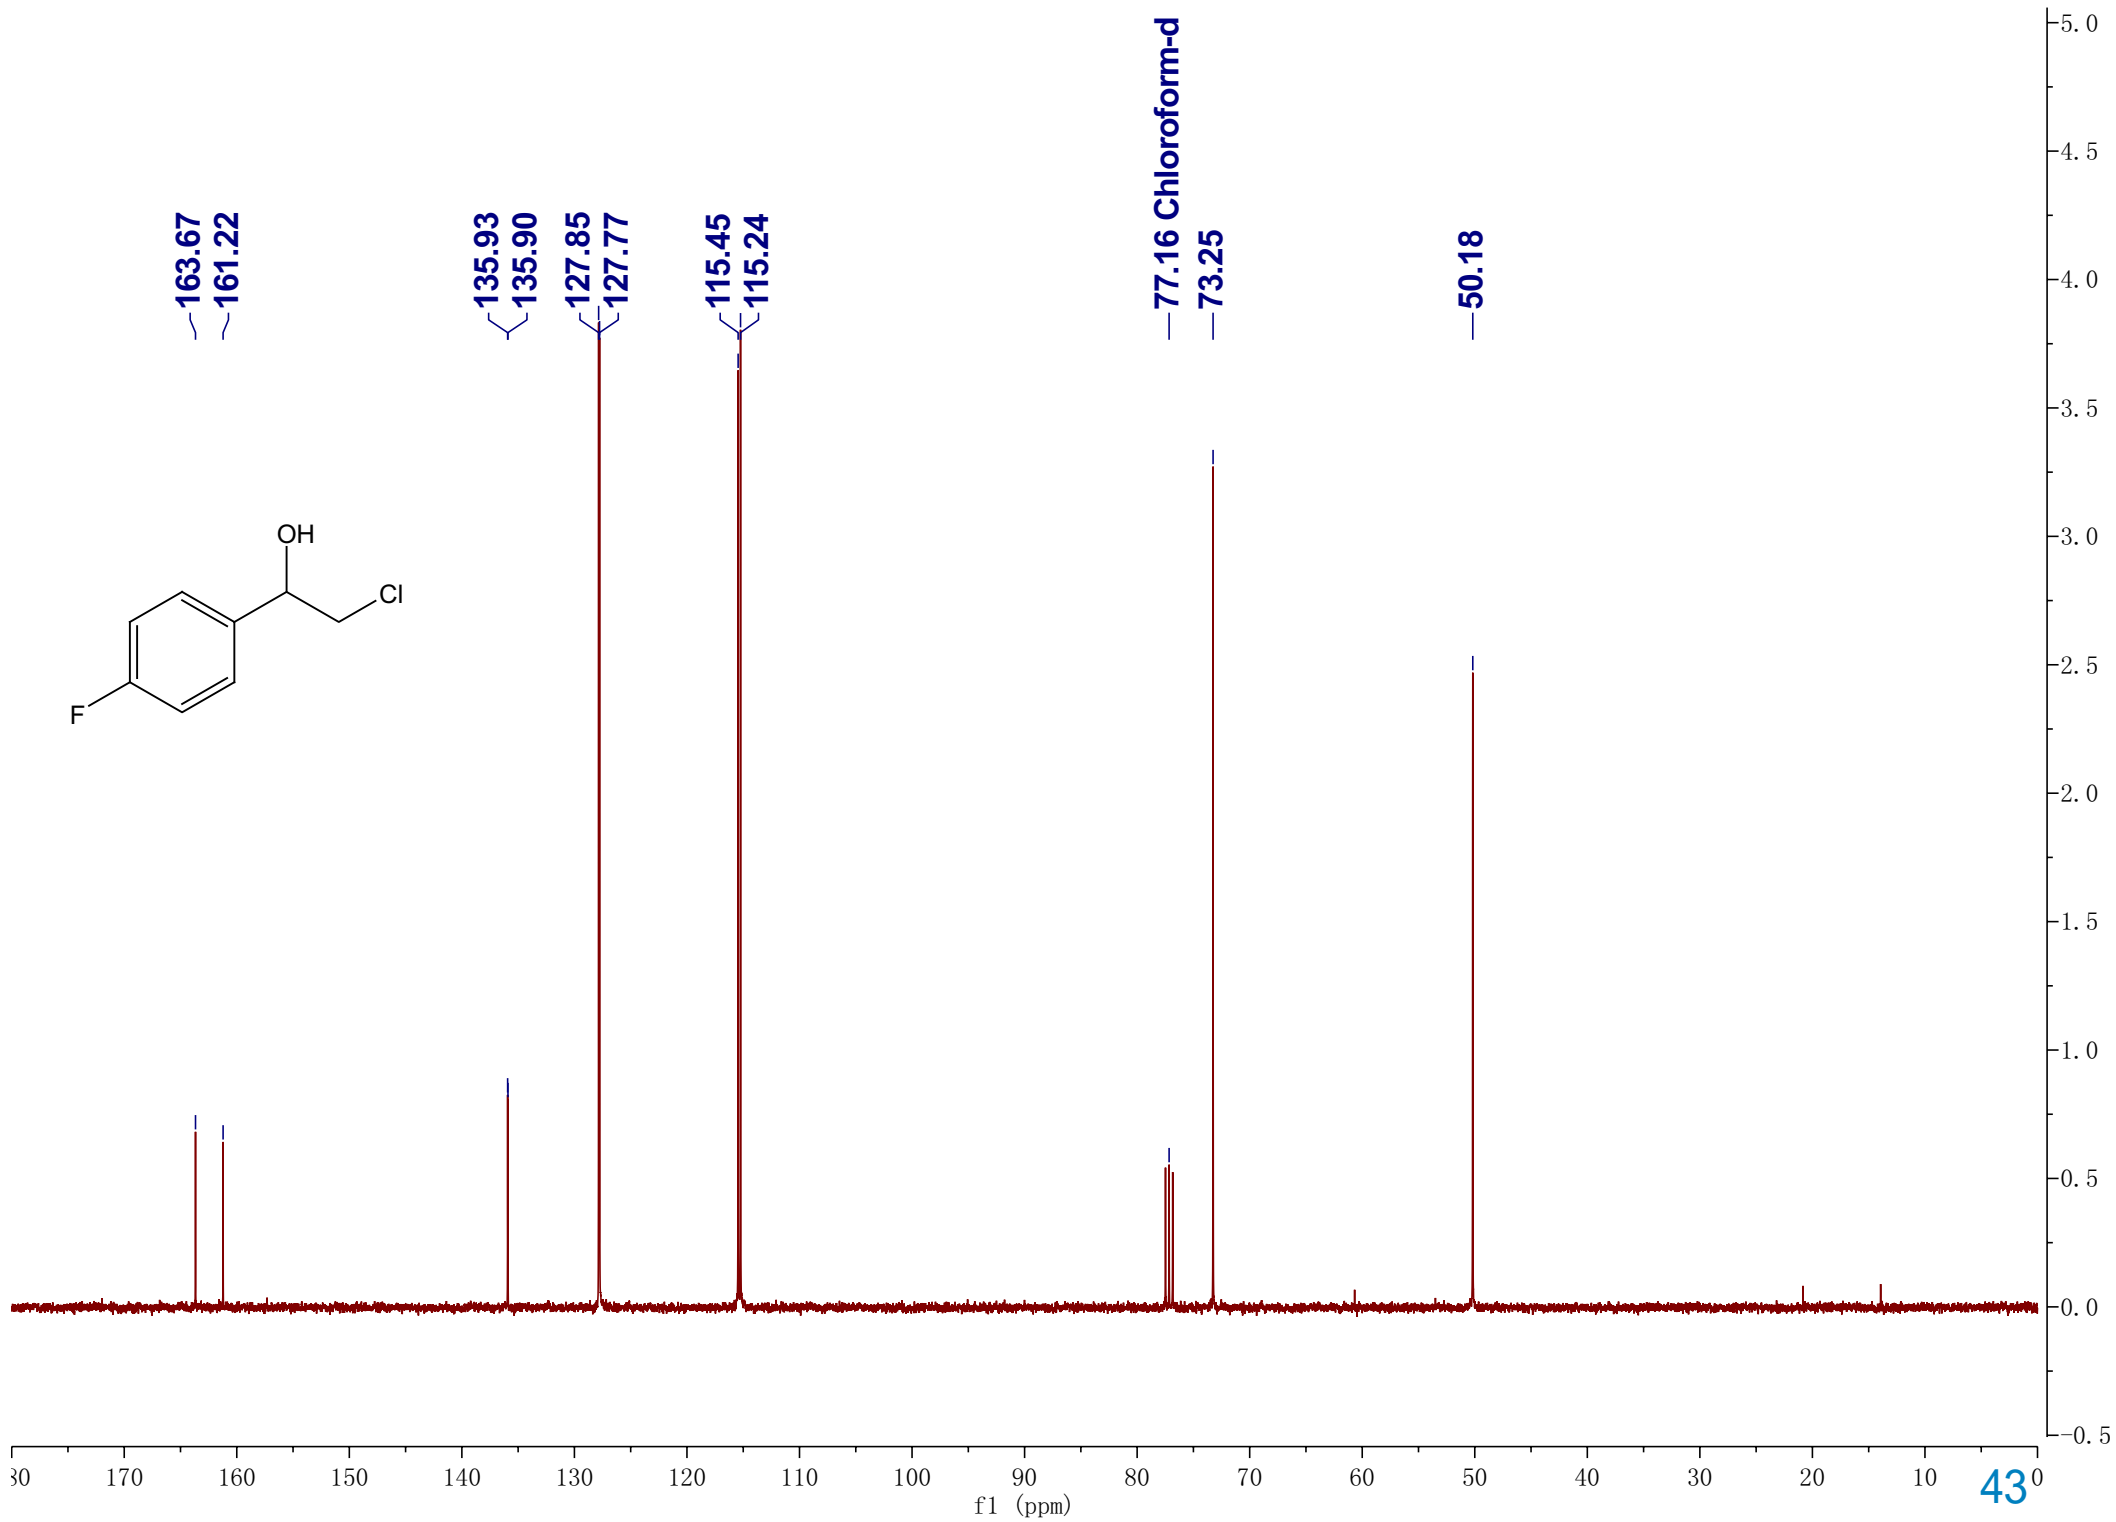

7.5420  
7.4503  
7.4476  
7.4309  
7.4283  
7.2966  
7.2772  
7.2451  
7.2265  
7.2071

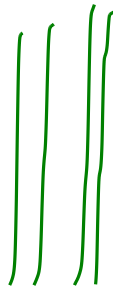

4.8648  
4.8576  
4.8434  
4.8362

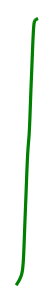

3.7217  
3.7020  
3.7000  
3.6974  
3.6934  
3.6916  
3.6188  
3.6170  
3.5972  
3.5952  
3.5928  
3.5908  
3.5774

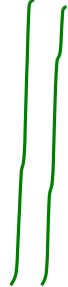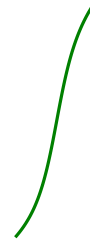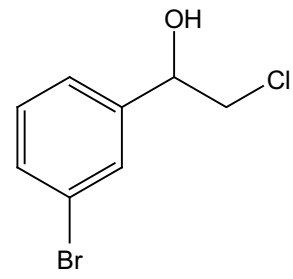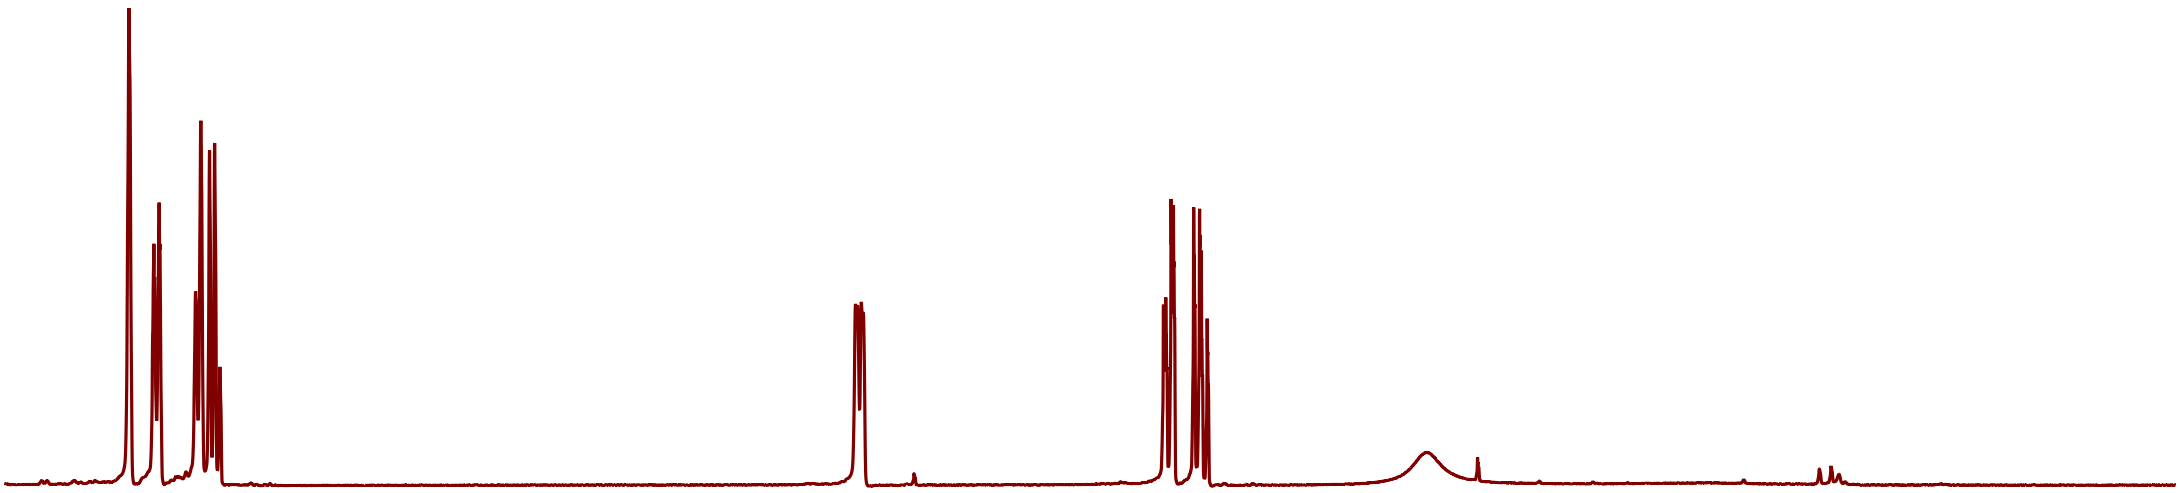

1.09  
1.13  
1.21  
1.18

1.15

1.24  
1.20

1.00

0 7.5 7.0 6.5 6.0 5.5 5.0 4.5 4.0 3.5 3.0 2.5 2.0 1.5 1.0 0.5 0

f1 (ppm)

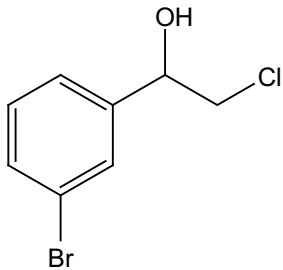

—142.215

131.637

130.337

129.313

124.822

122.894

—77.160 Chloroform-d

—73.420

—50.770

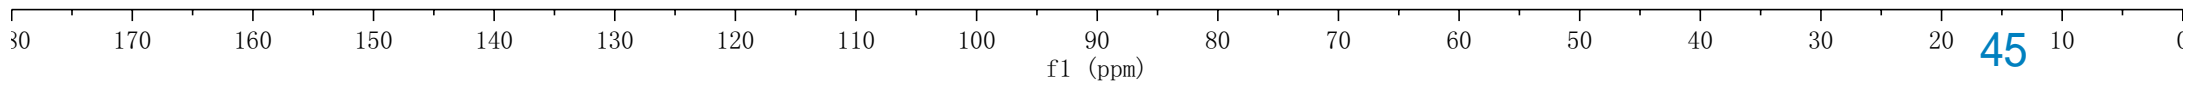

7.3895  
7.3785  
7.3647  
7.3602  
7.3548  
7.3460  
7.3422  
7.3333  
7.2600

4.9342  
4.9257  
4.9119  
4.9035

3.6525  
3.6440  
3.6263  
3.6178  
3.5671  
3.5449  
3.5411  
3.5187

2.5906

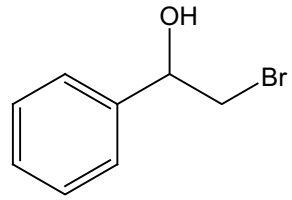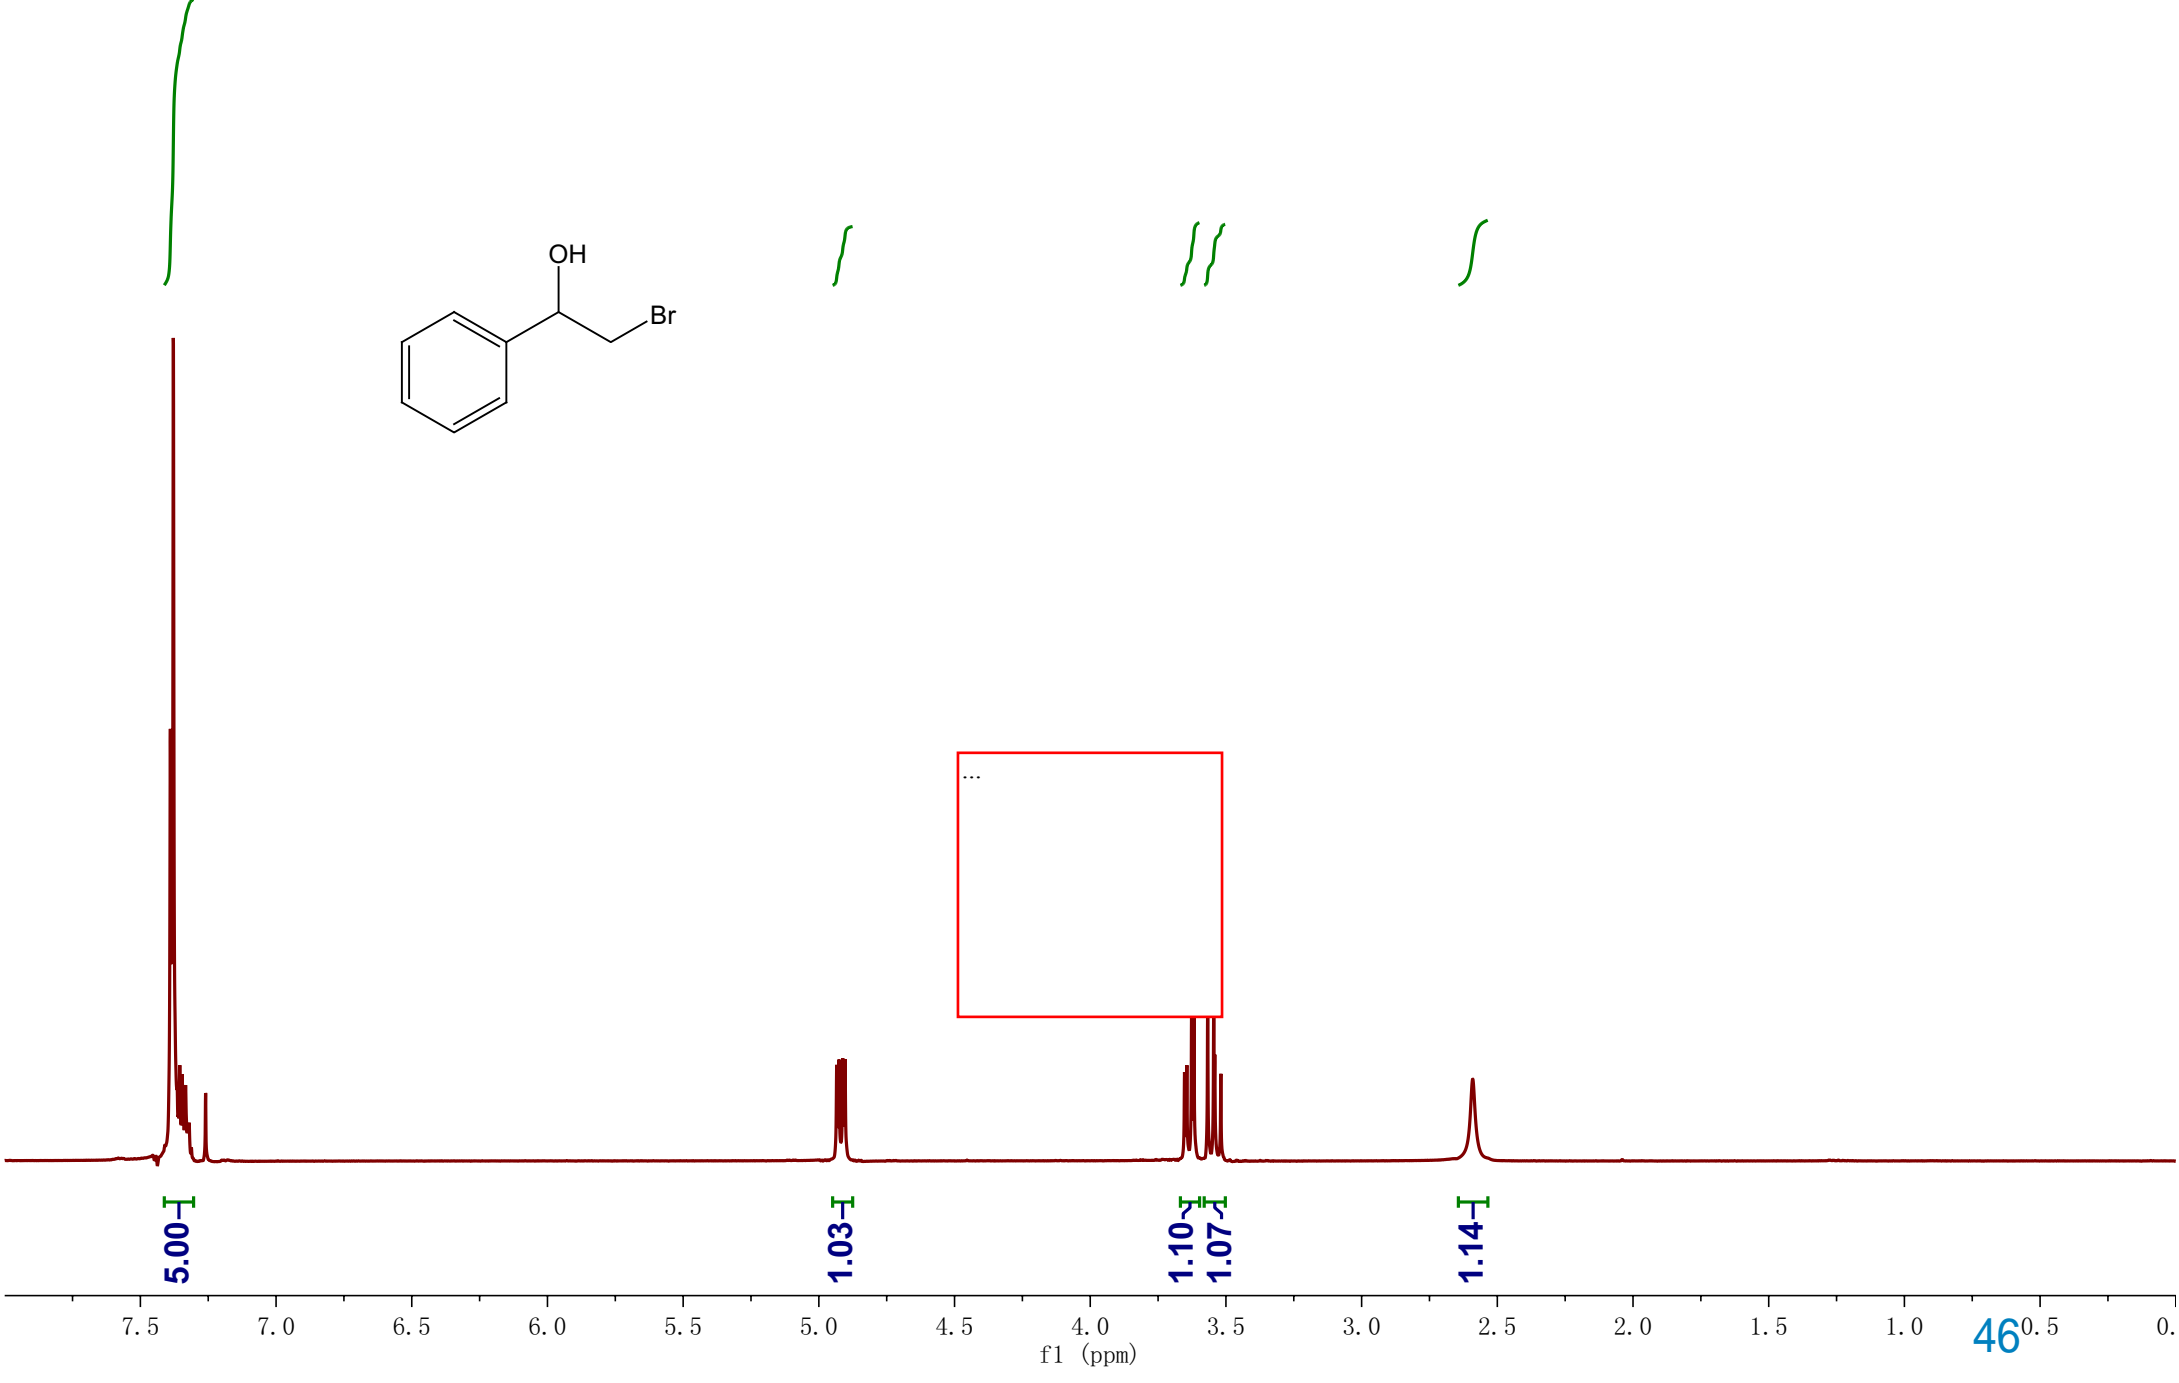

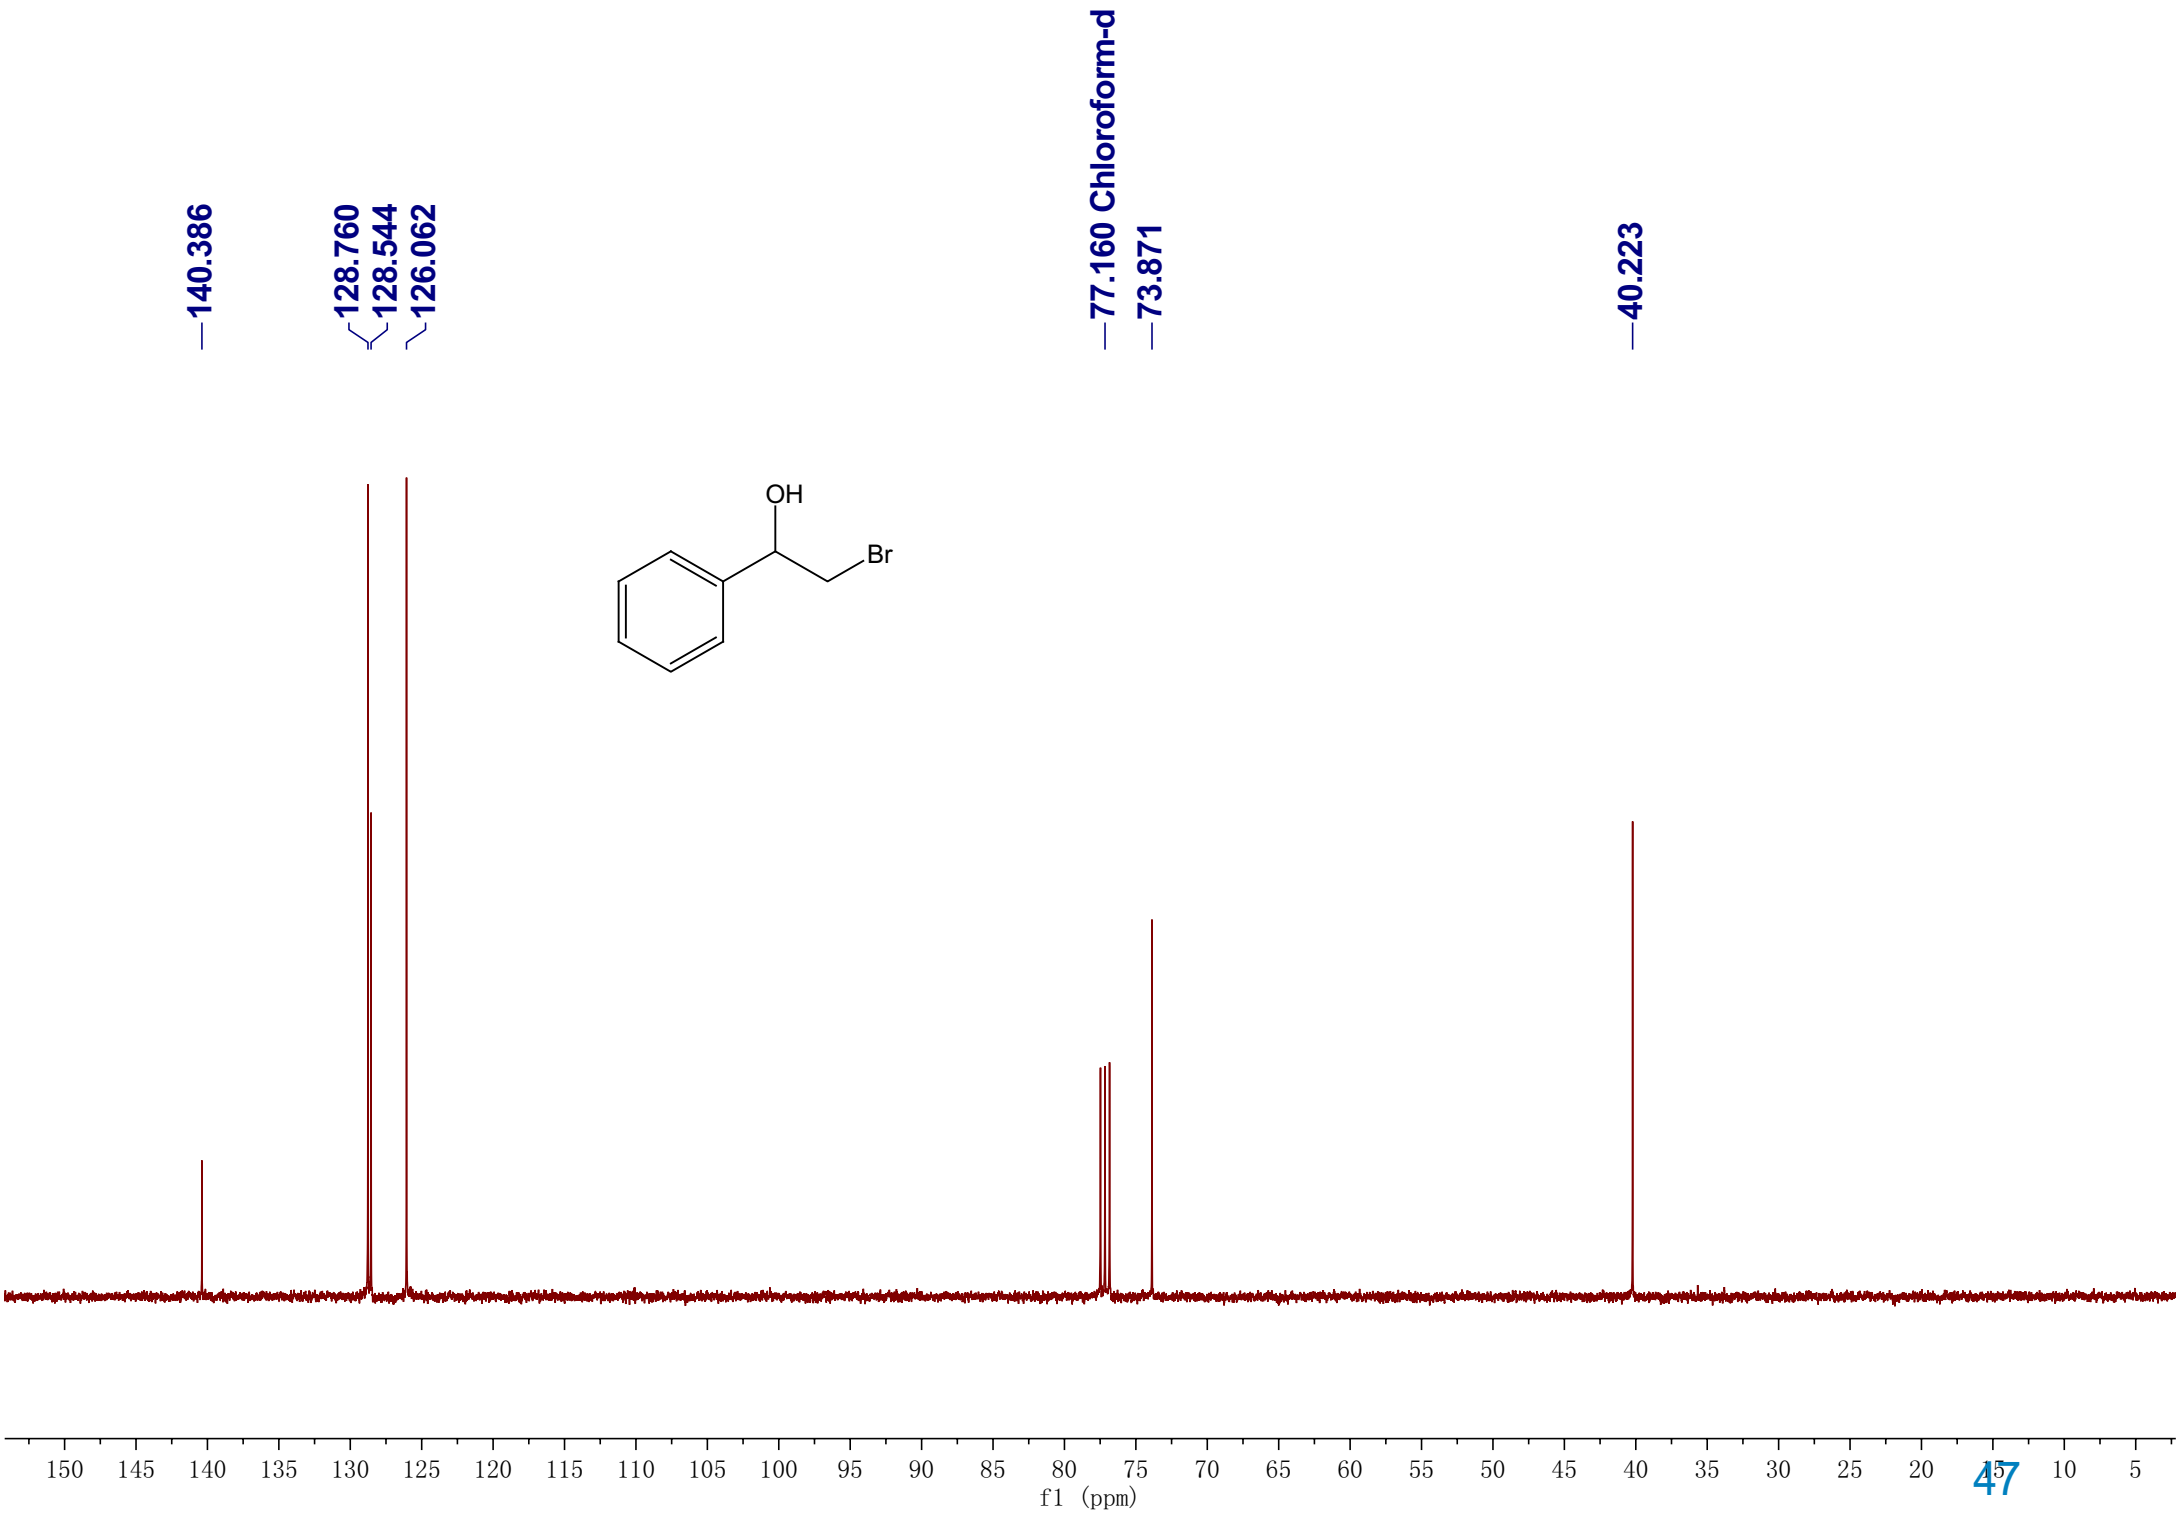



7.5110  
7.4940  
7.2595  
7.2434  
7.2278  
7.2138  
7.1961  
7.1603  
7.1433

5.1366  
5.1305  
5.1134  
5.1072

3.5914  
3.5844  
3.5649  
3.5580  
3.4982  
3.4743  
3.4483

2.4214

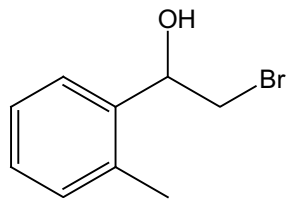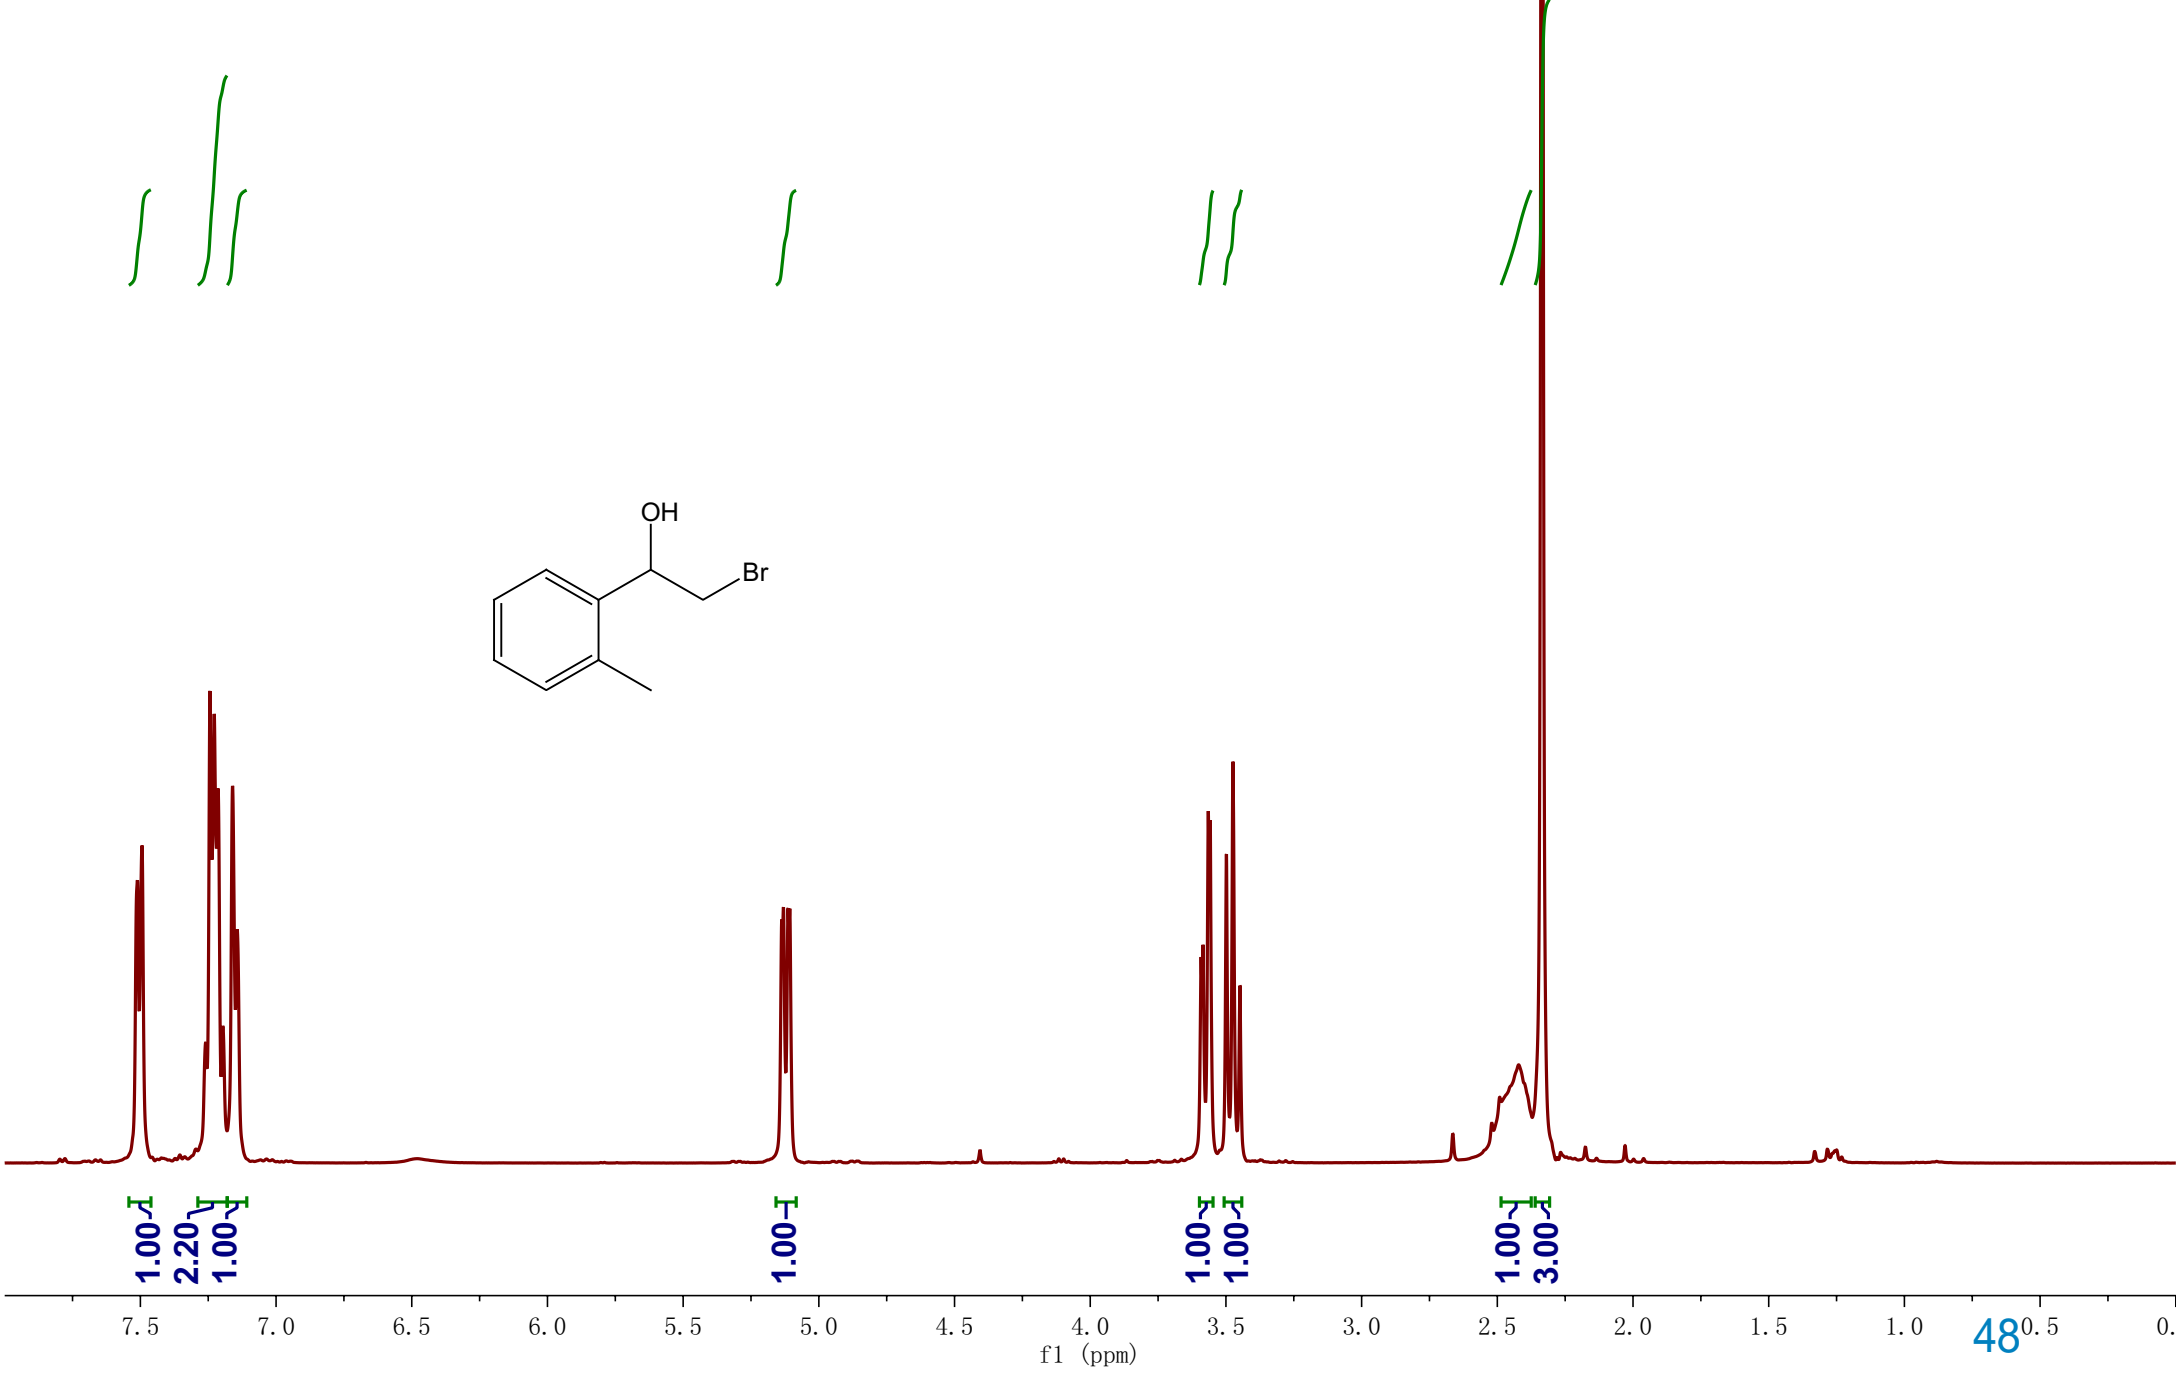

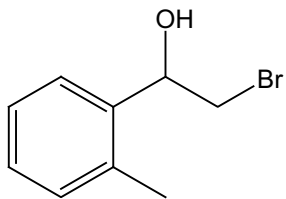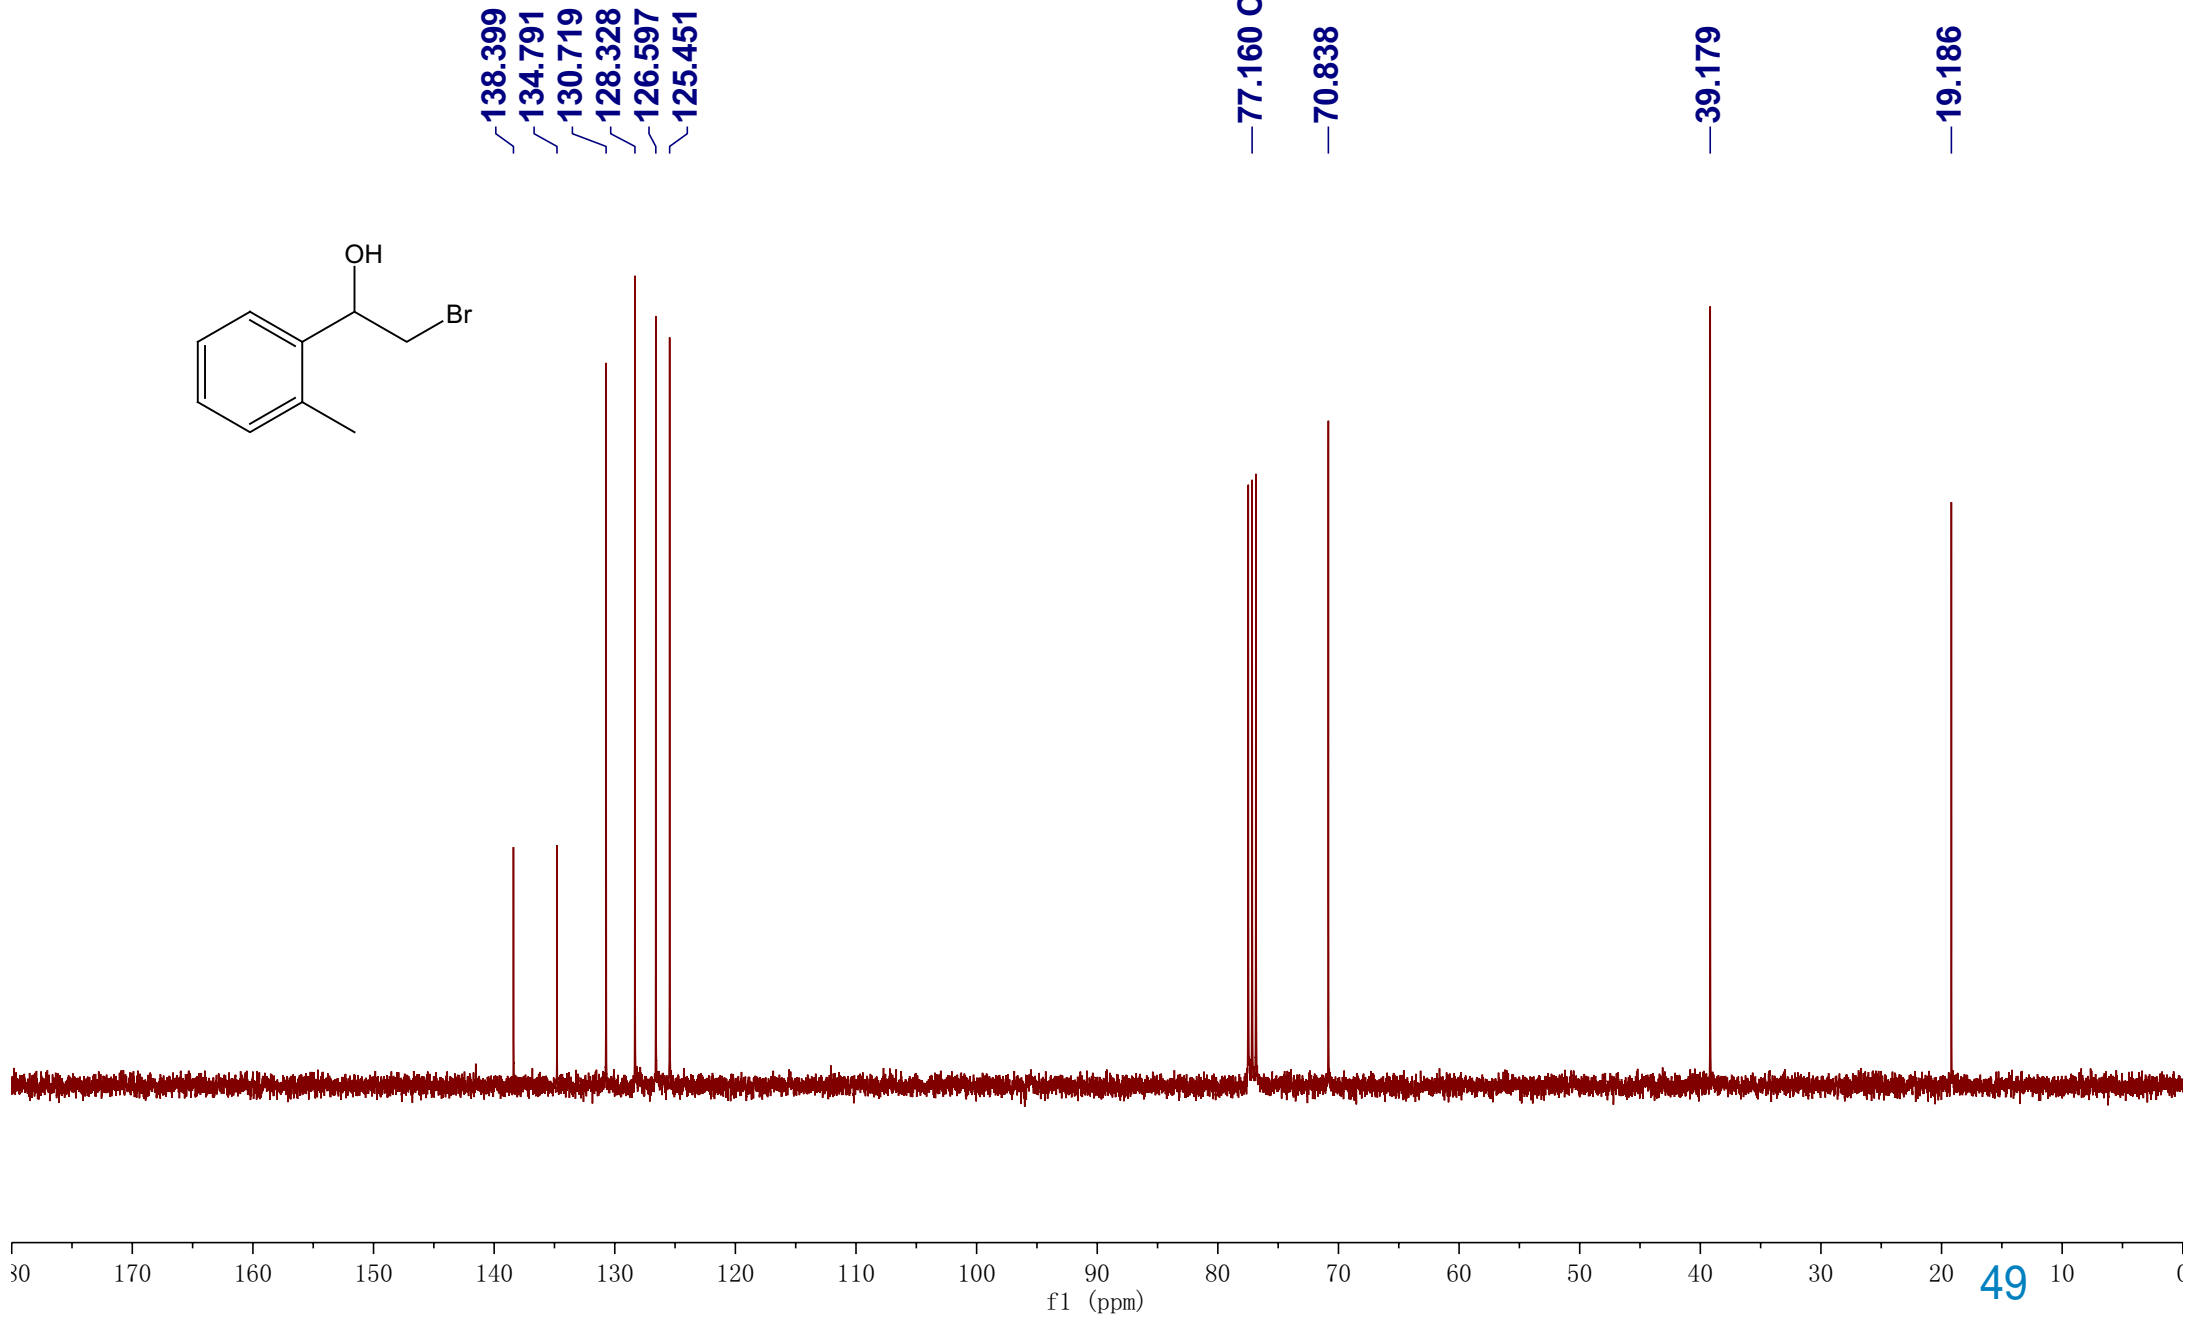

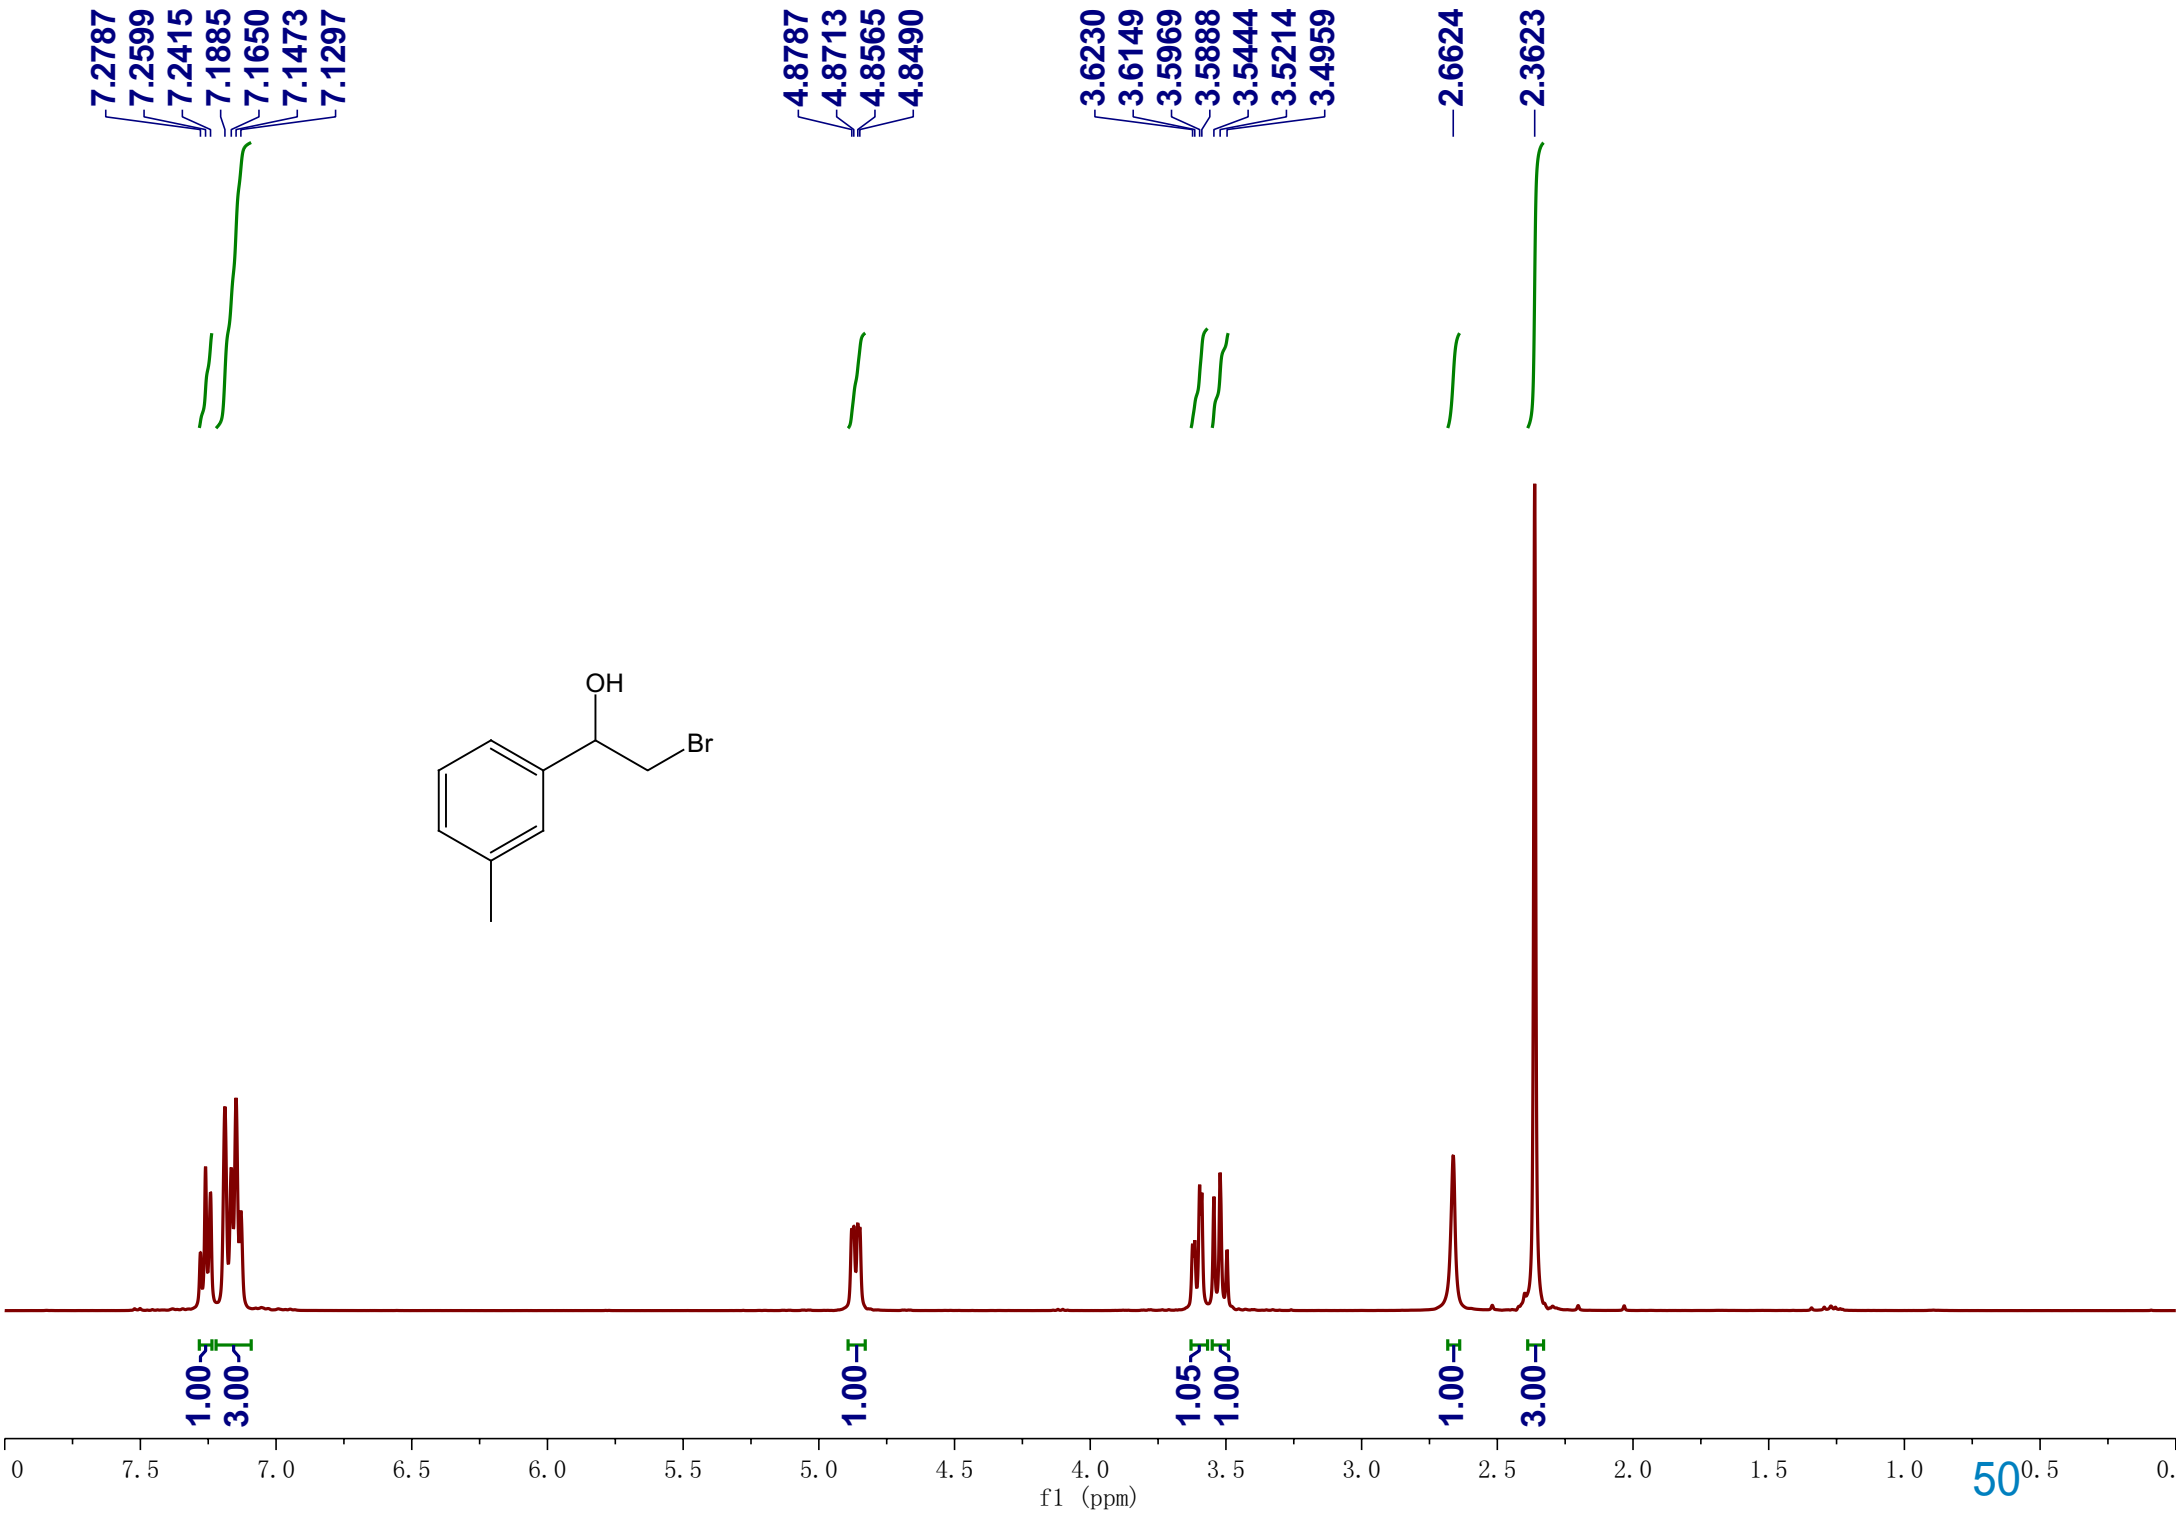

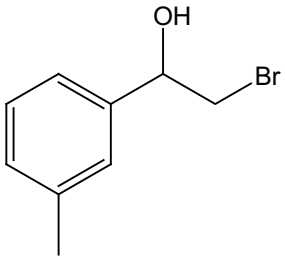

~140.313  
~138.460

~129.272  
~128.629  
~126.679  
~123.129

—77.160 Chloroform-d  
—73.914

—40.244

—21.530

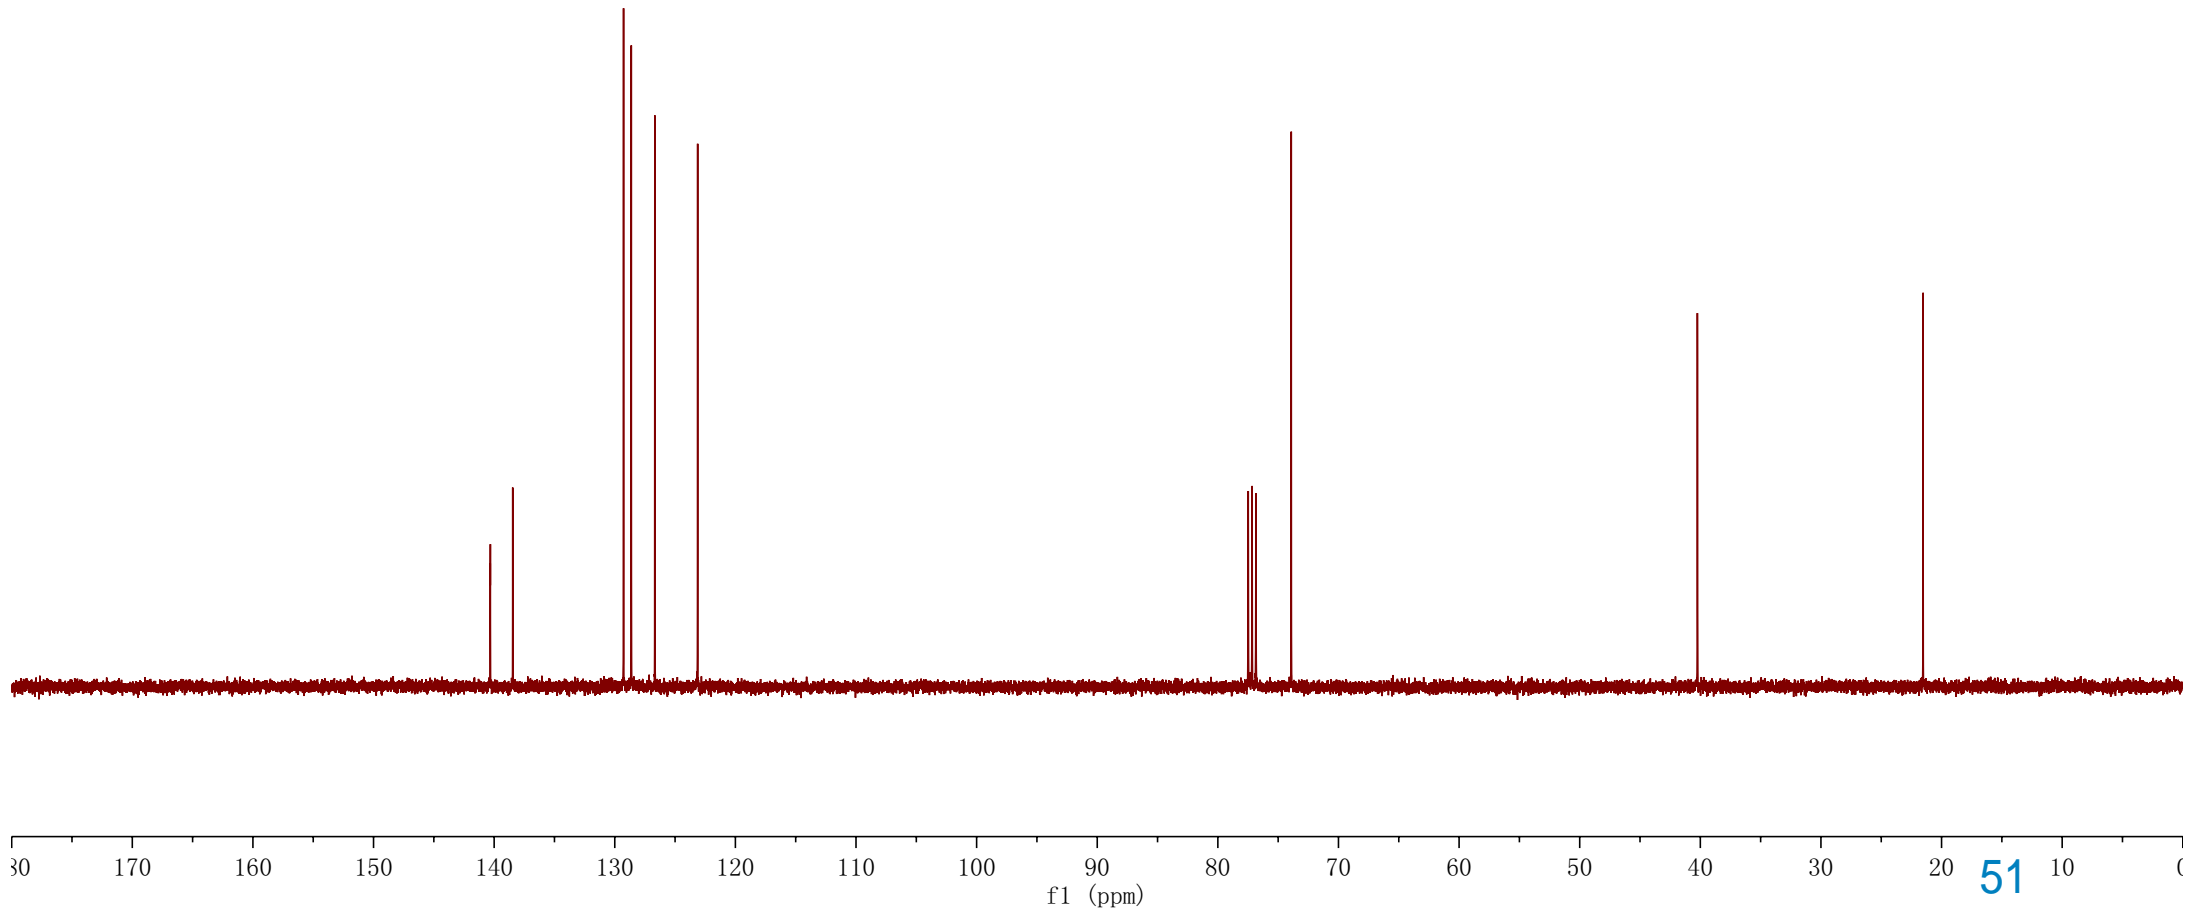

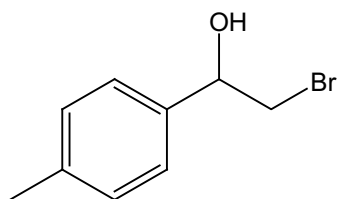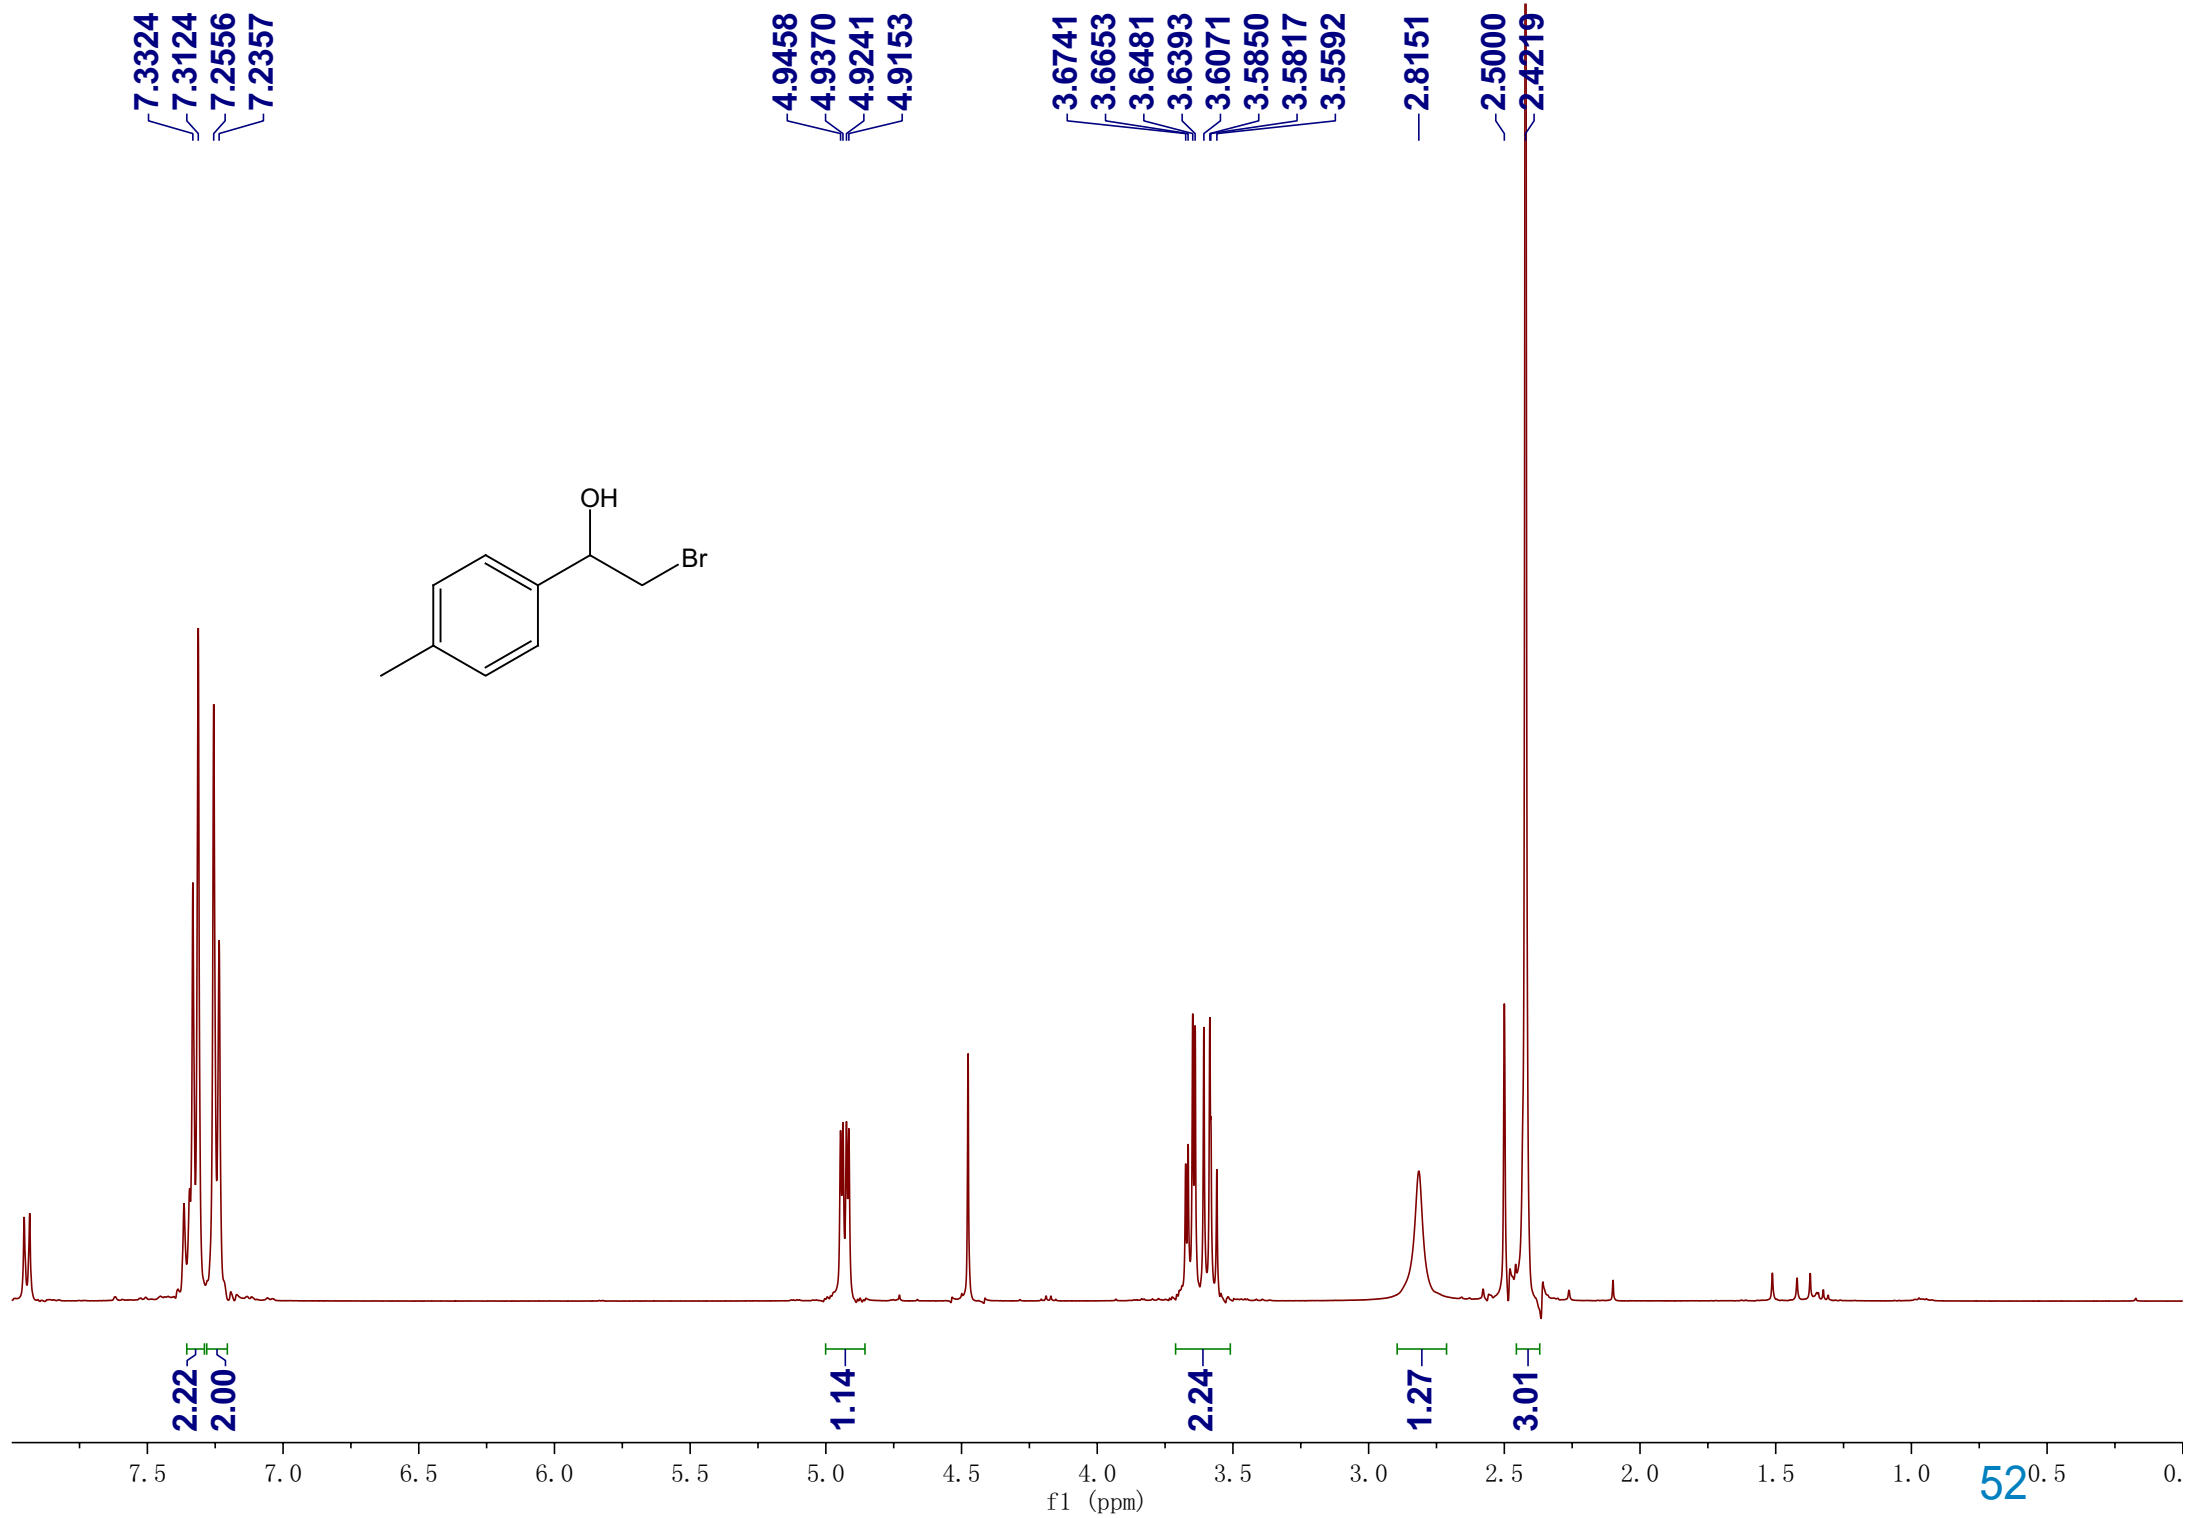

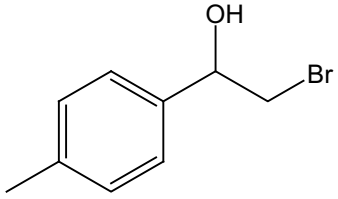

138.217  
137.464

129.342  
125.948

77.160 Chloroform-d  
73.675

40.129

21.221

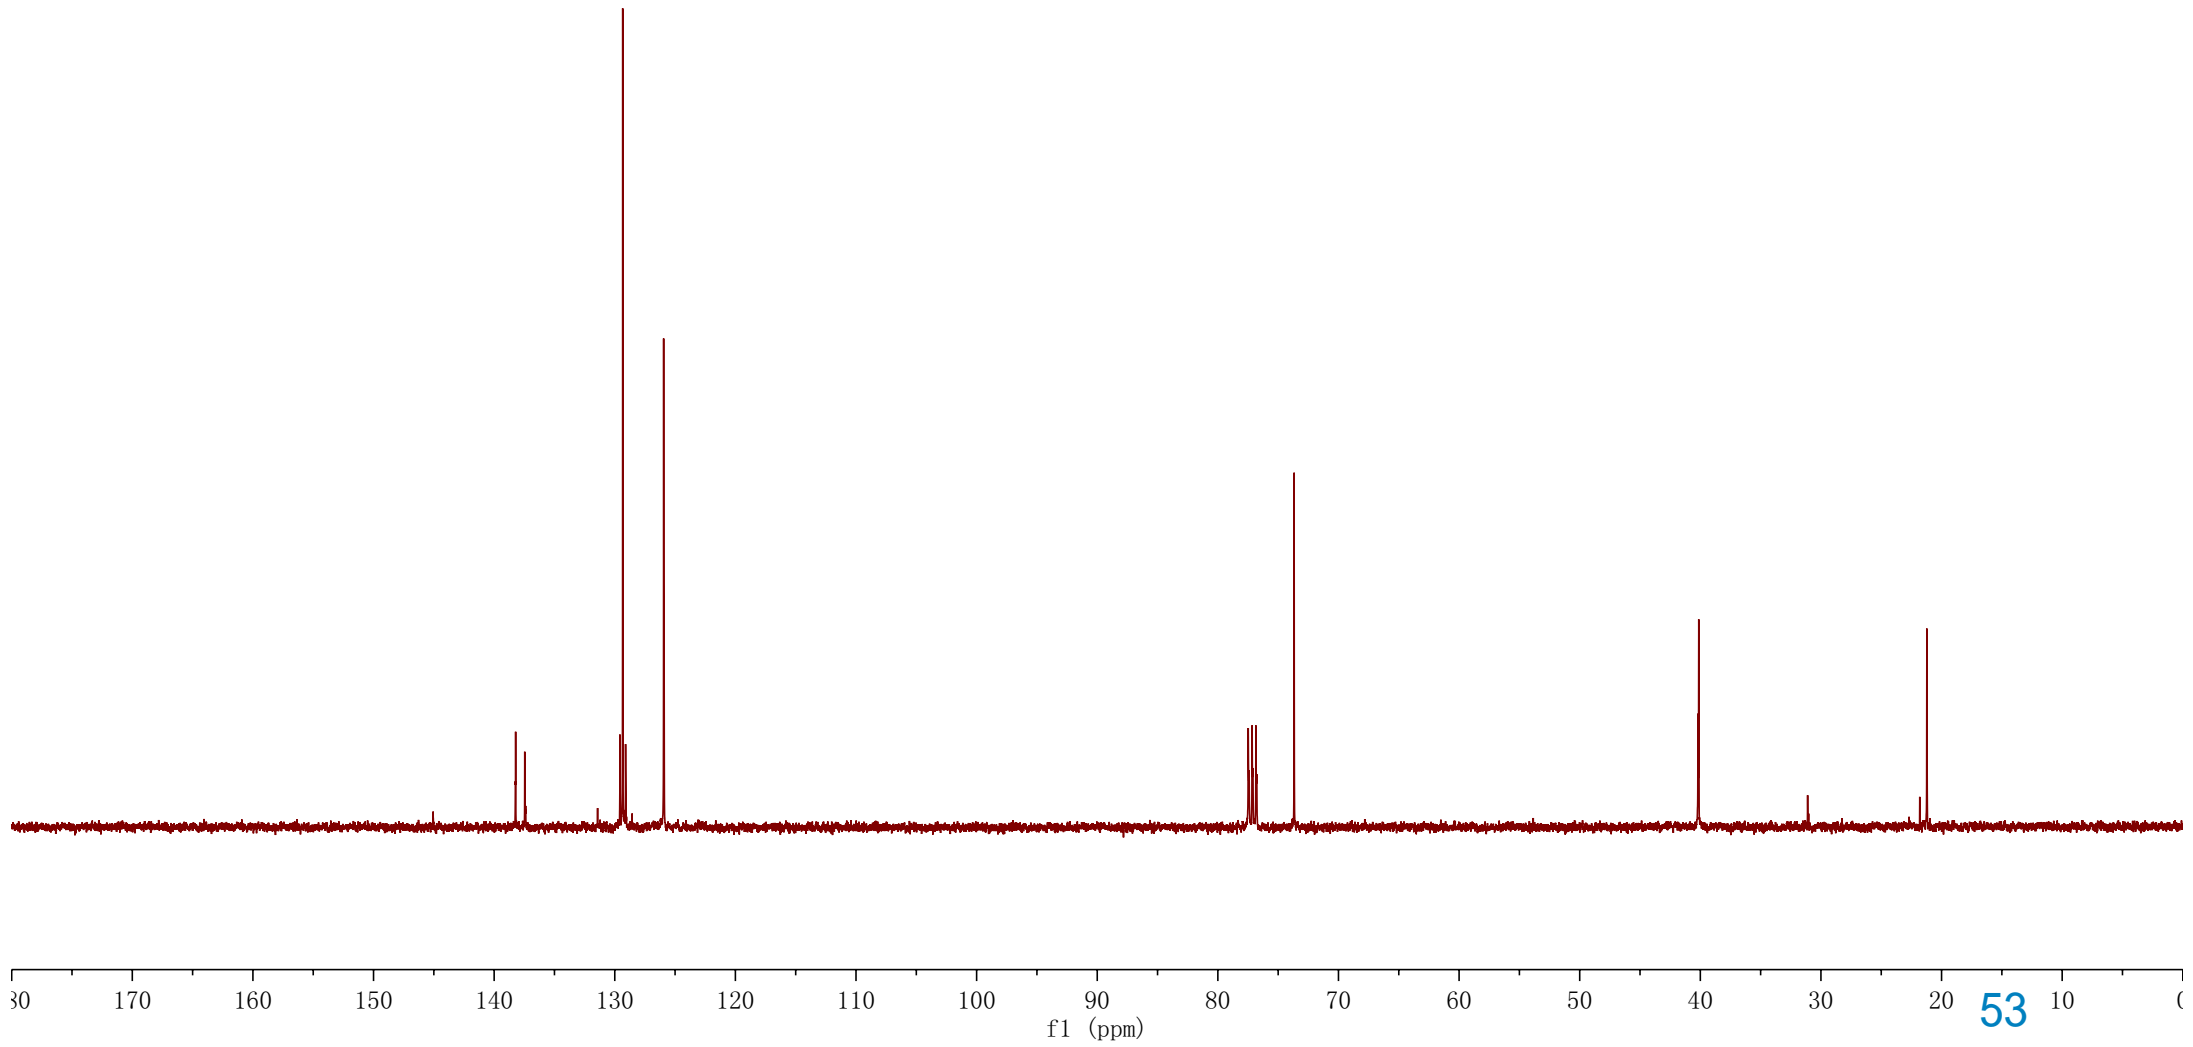

7.3581  
7.3527  
7.3403  
7.3316  
7.3235  
7.3186  
7.2600  
7.0710  
7.0662  
7.0494  
7.0446  
7.0322  
7.0278  
7.0228

4.8960  
4.8869  
4.8742

3.6006  
3.5966  
3.5802  
3.5745  
3.5704  
3.5616  
3.5226  
3.5180  
3.5128  
3.5007  
3.4963  
3.4911

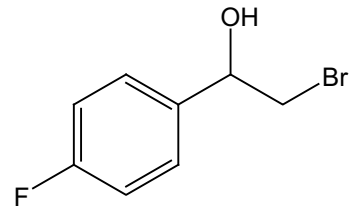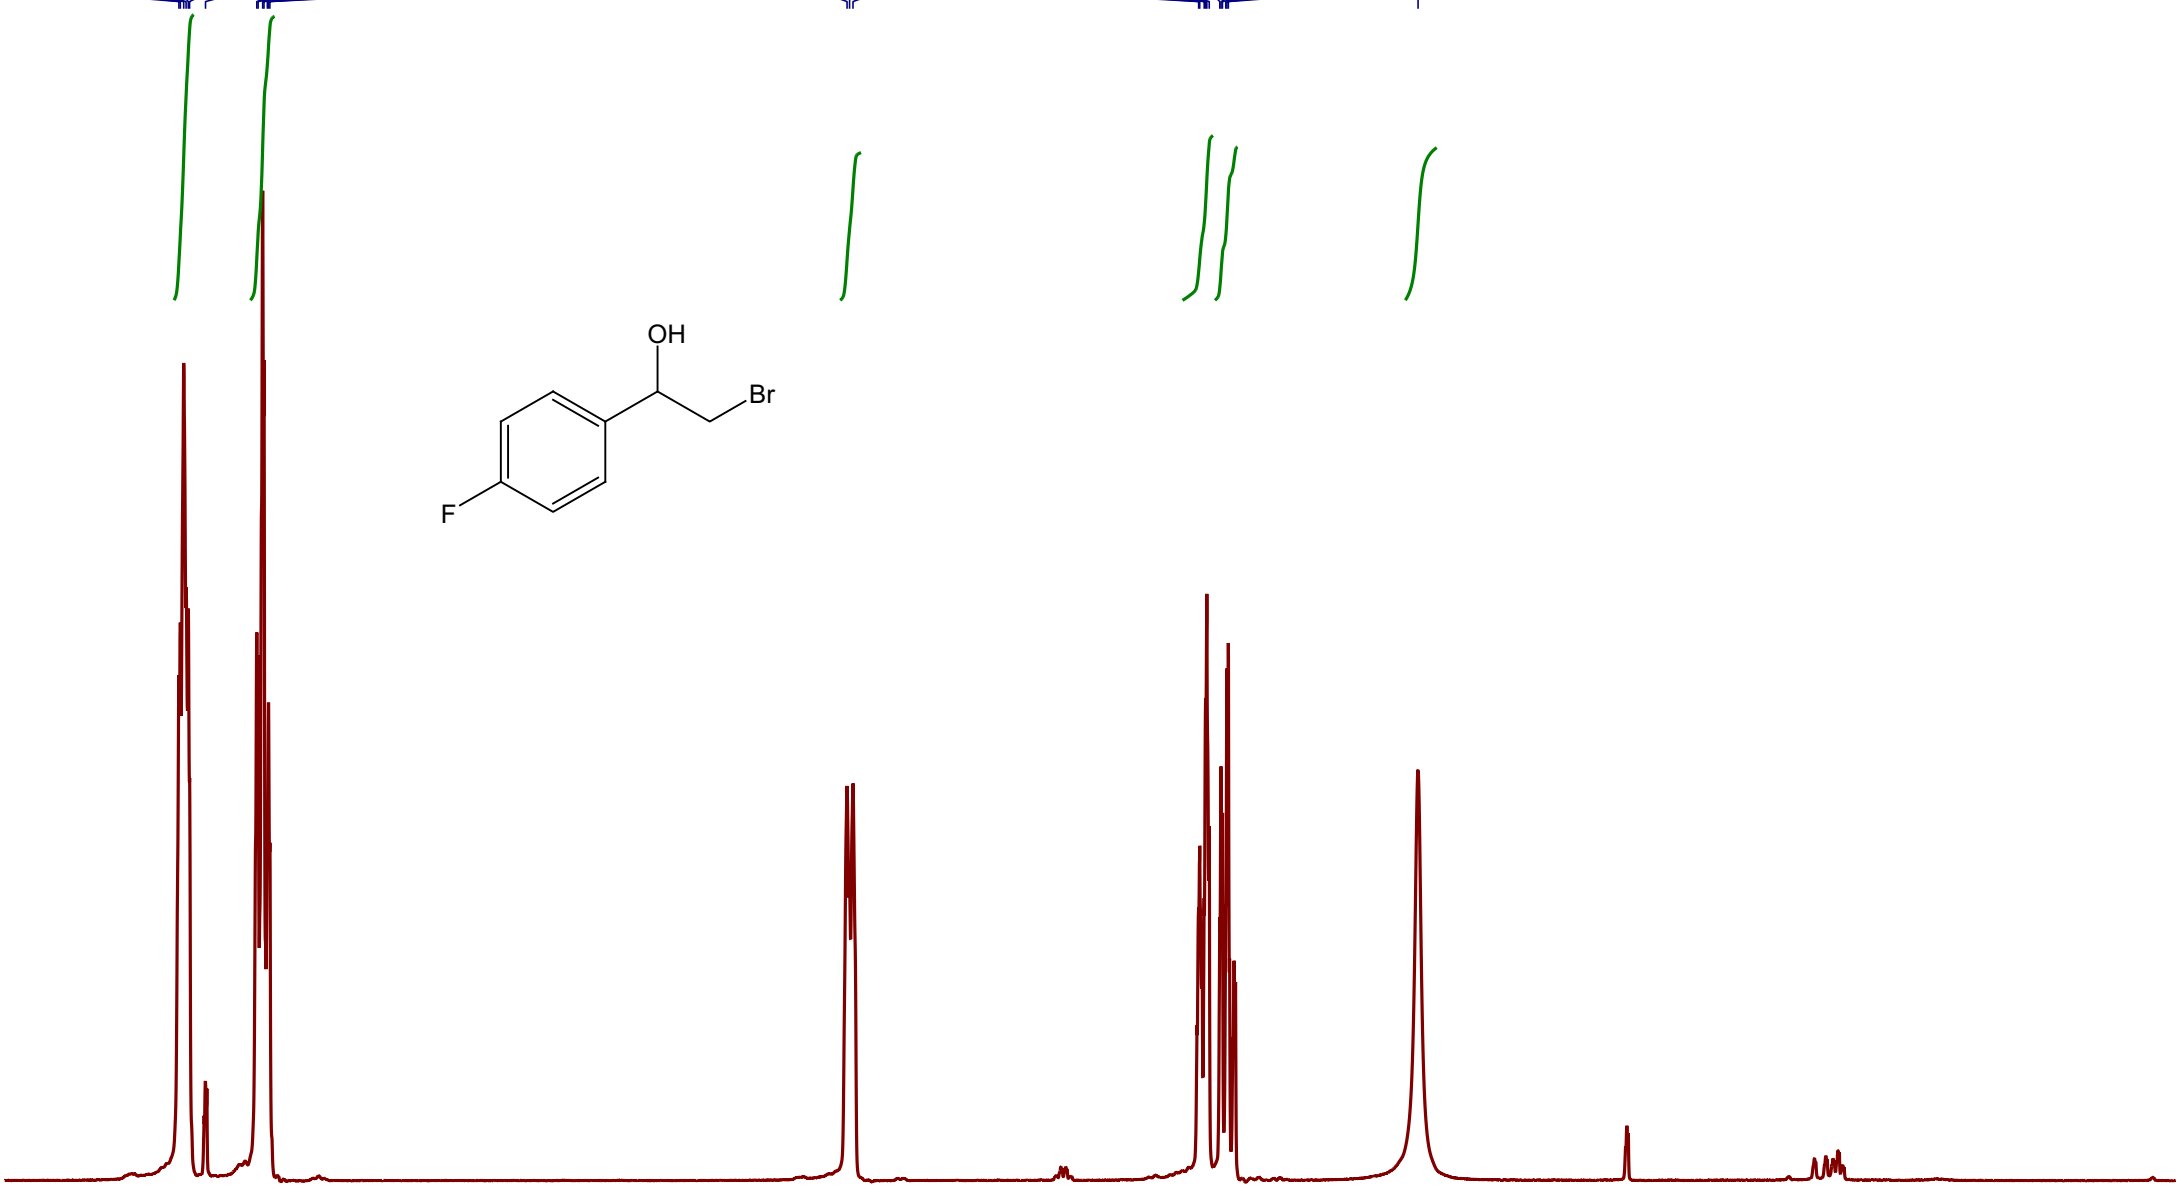

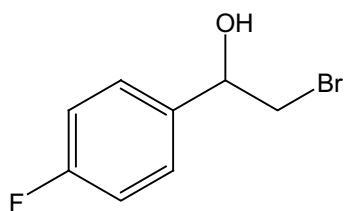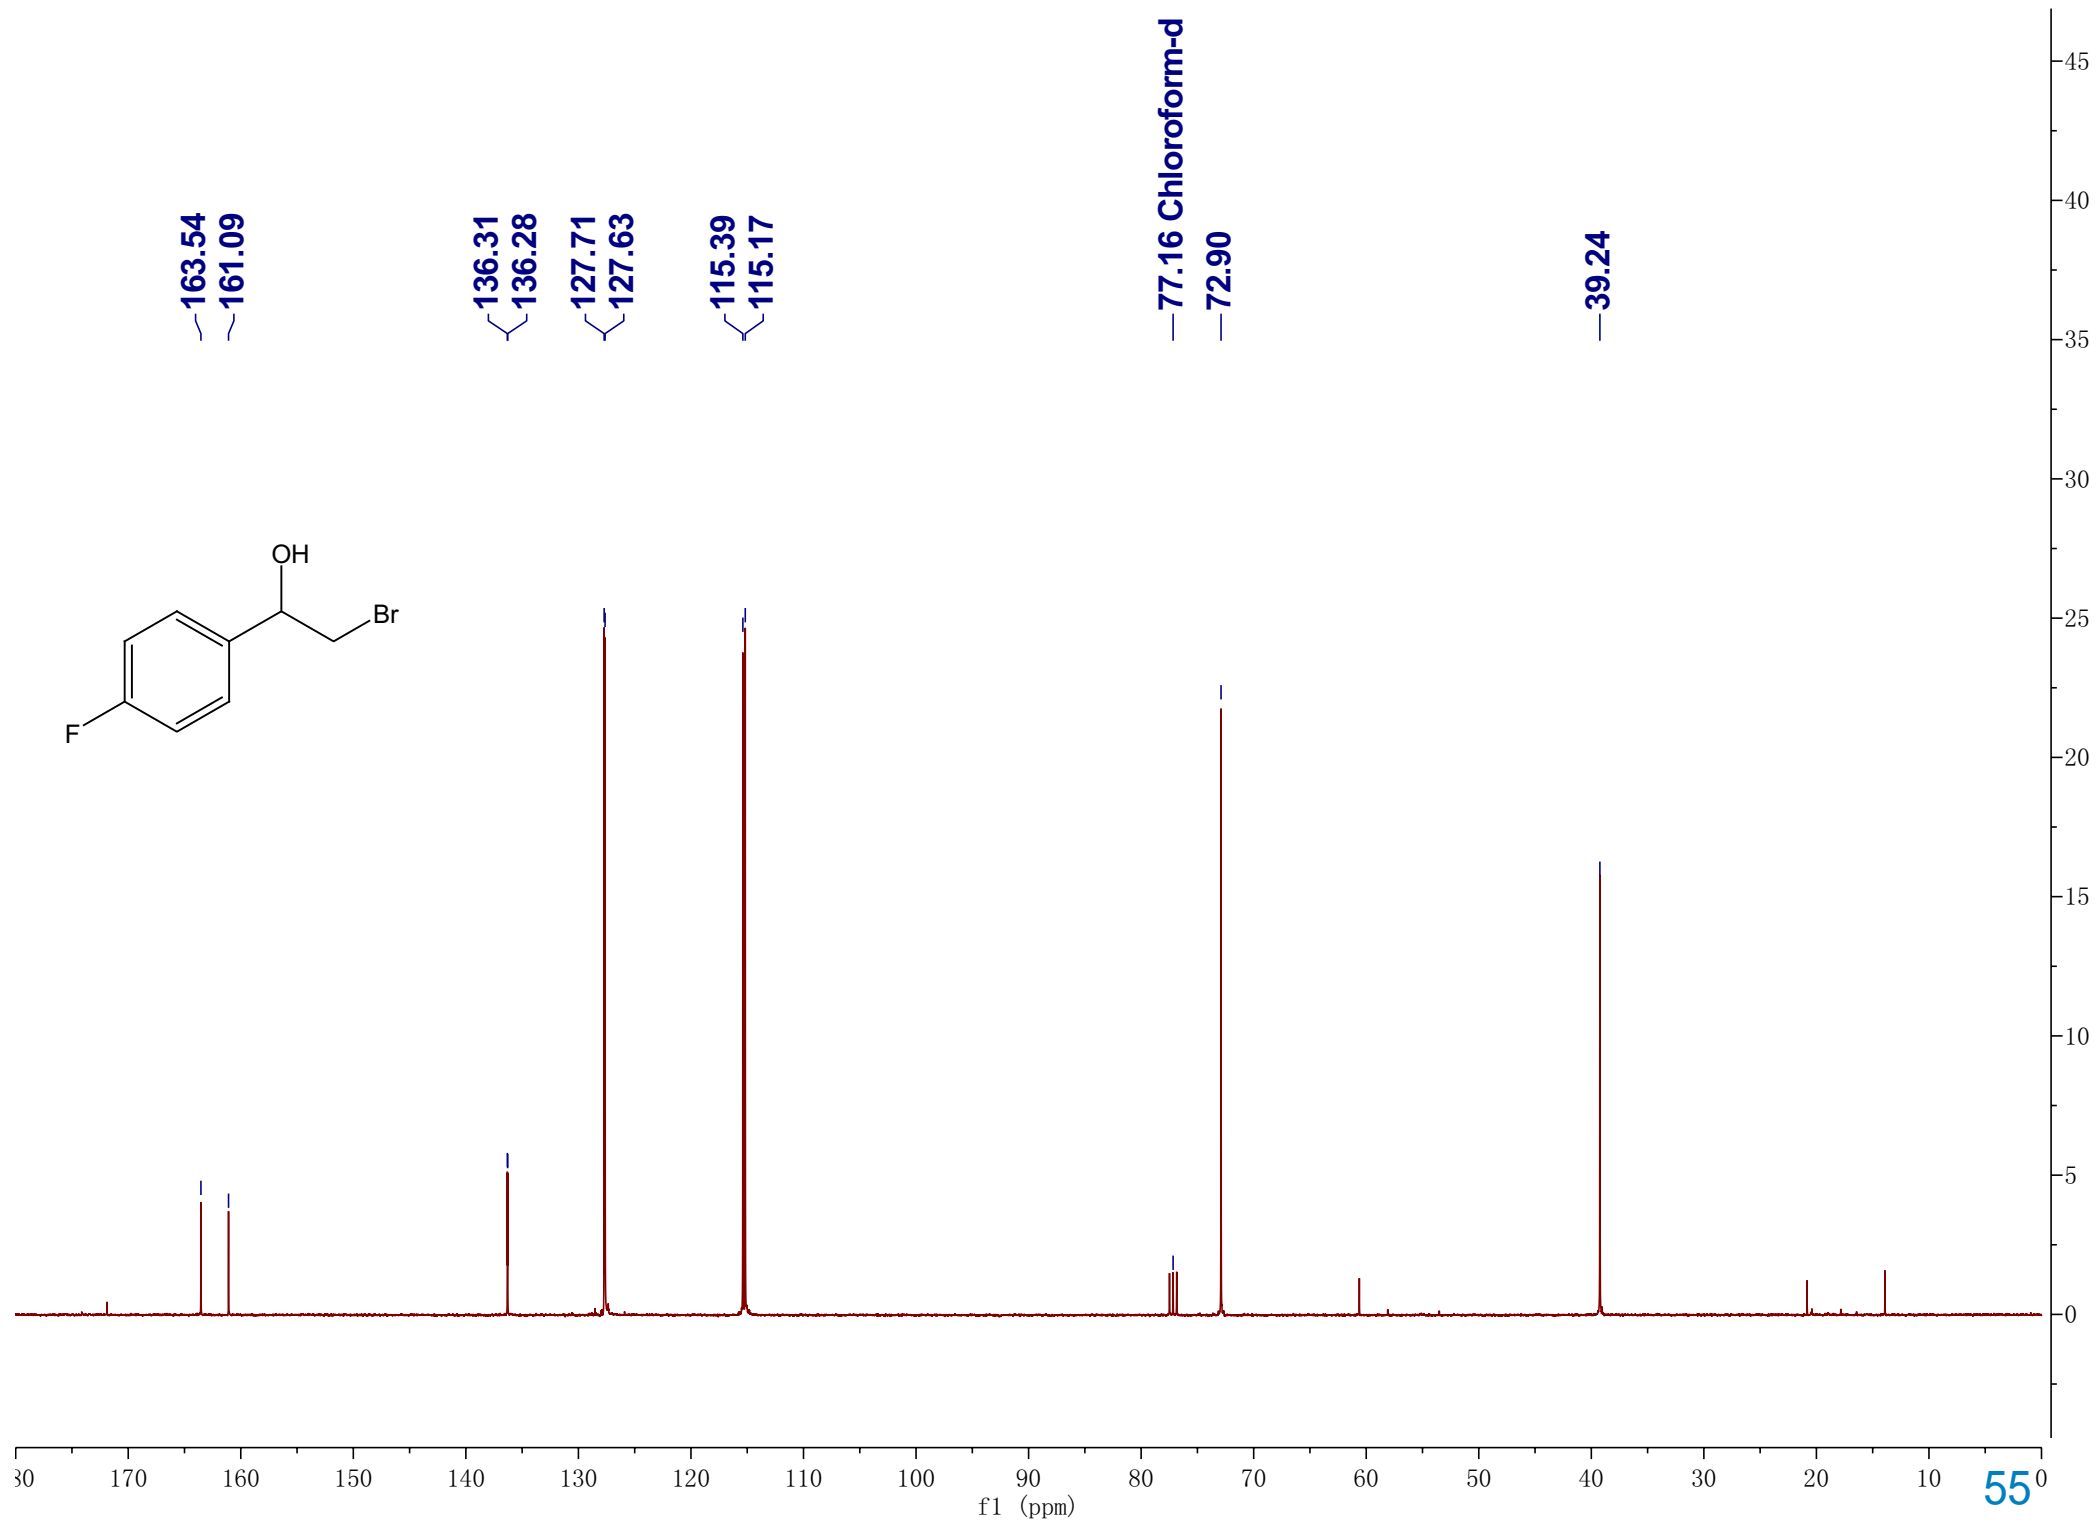



7.3443  
7.3382  
7.3301  
7.3239  
7.3232  
7.3020  
7.2808  
7.2600

4.8856  
4.8770  
4.8640  
4.8558

3.5970  
3.5903  
3.5882  
3.5706  
3.5640  
3.5620  
3.5040  
3.5021  
3.4825  
3.4804  
2.8757

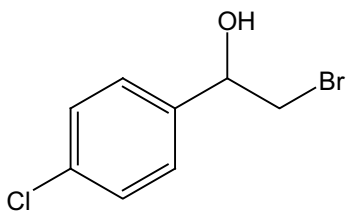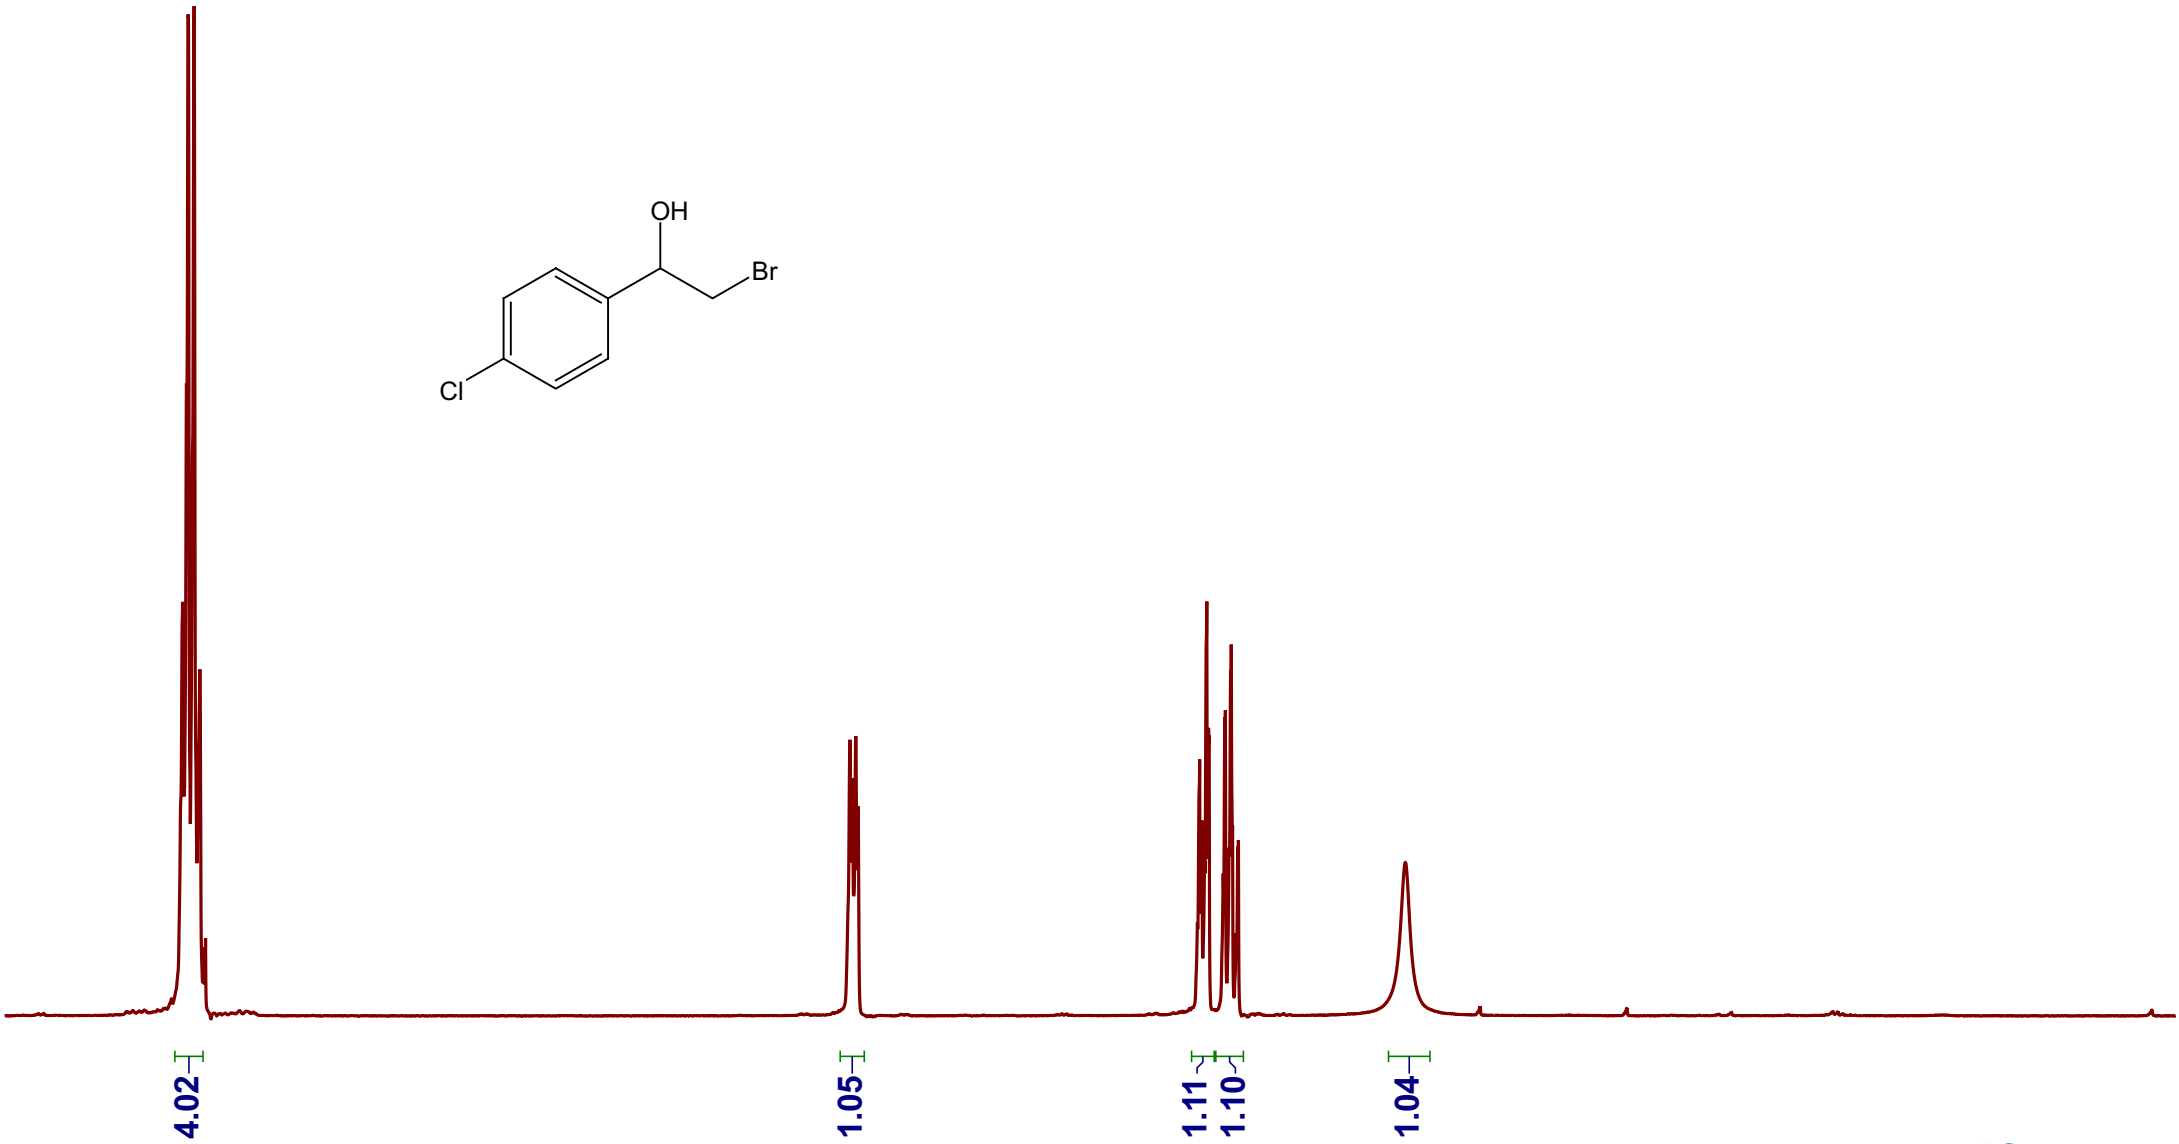

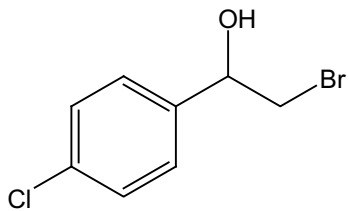

138.801  
134.196  
128.873  
127.428

77.160 Chloroform-d  
73.170

39.827

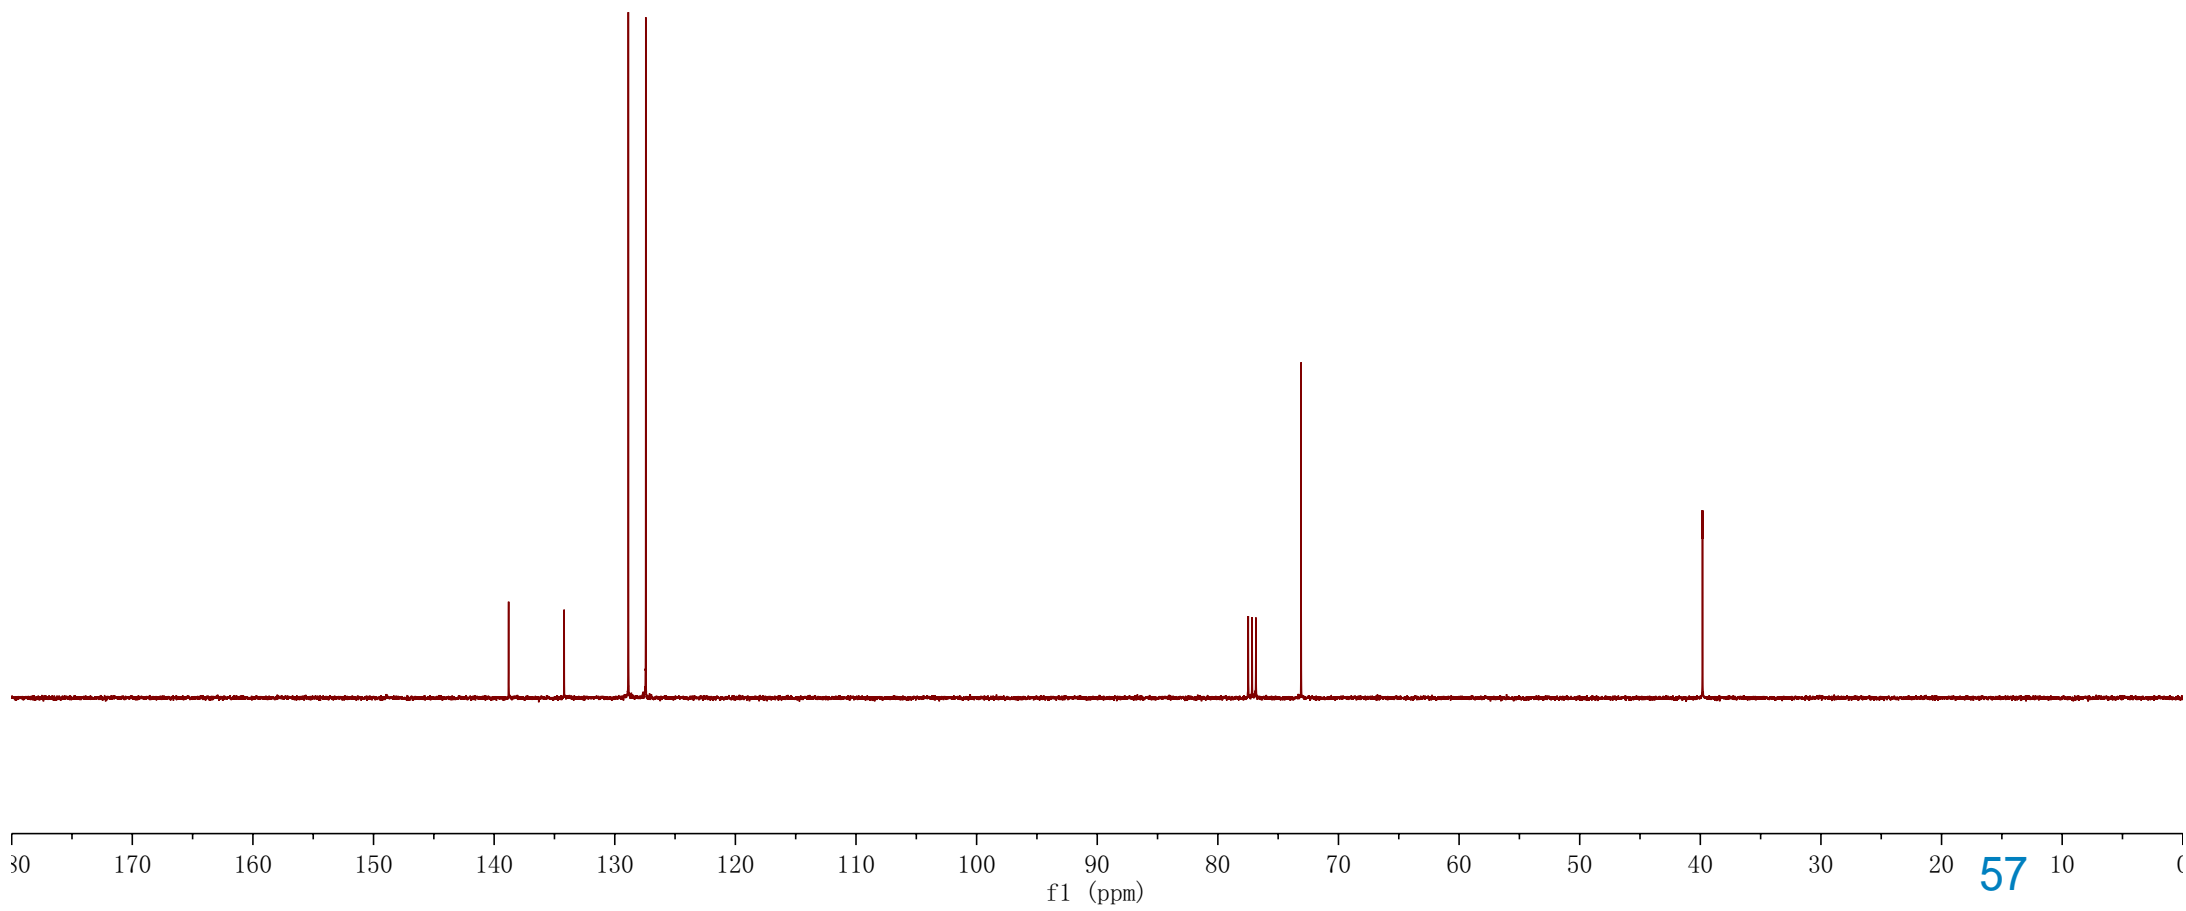

7.5257  
7.4387  
7.4370  
7.4345  
7.4192  
7.4150  
7.2818  
7.2795  
7.2625  
7.2600  
7.2327  
7.2316  
7.2138  
7.1945

4.8713  
4.8494

3.6099  
3.6016  
3.5989  
3.5835  
3.5808  
3.5752  
3.5725  
3.4961  
3.4935  
3.4739  
3.4708  
3.4672  
3.4476  
3.4226  
2.7166

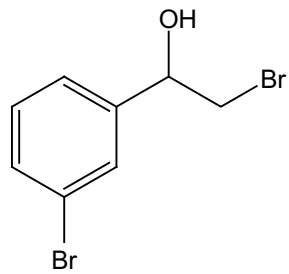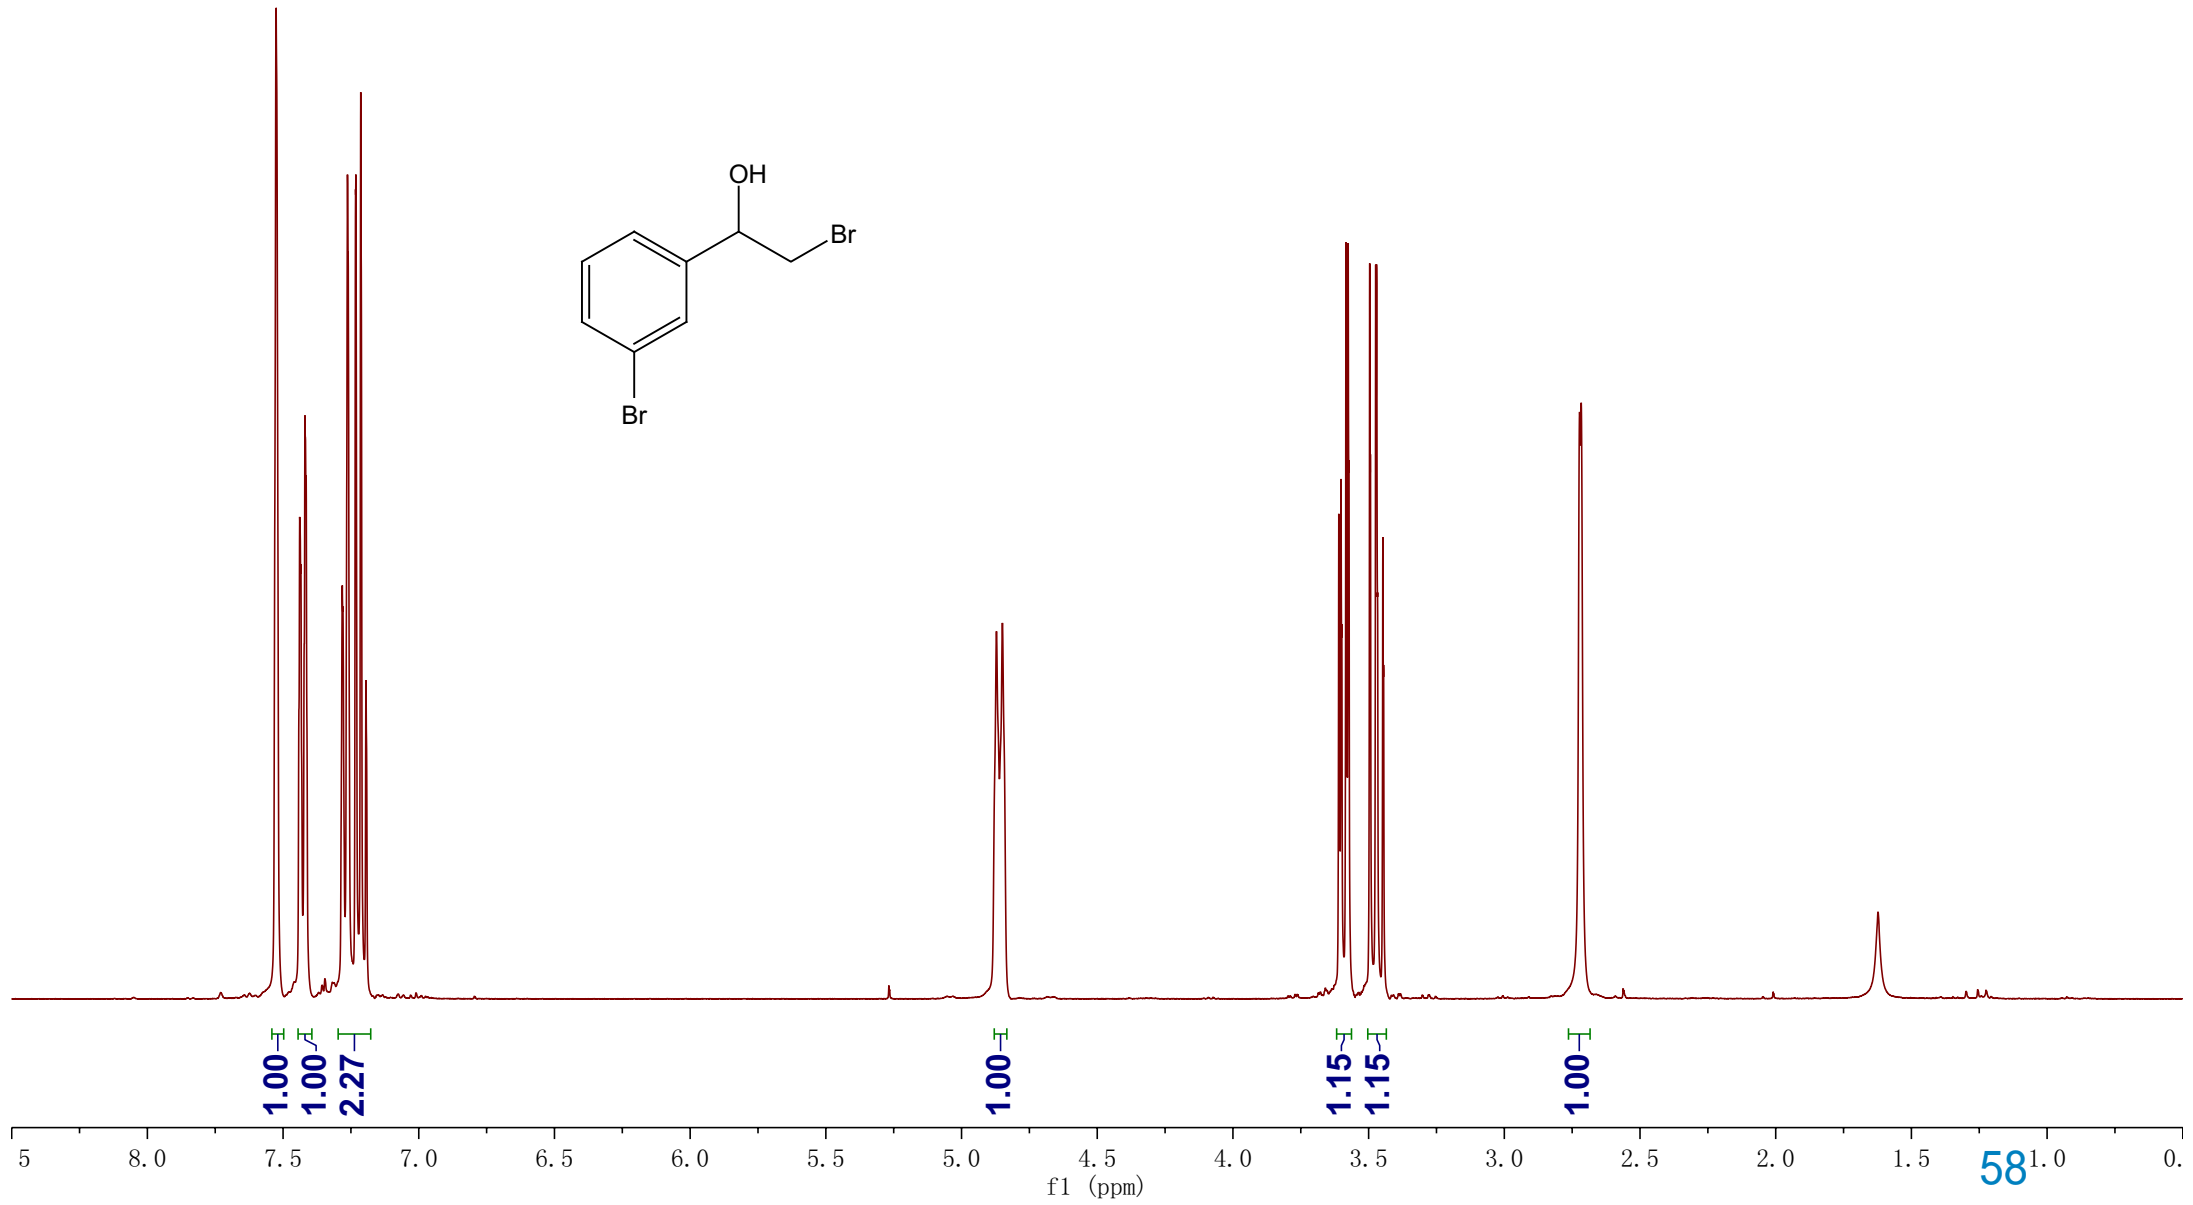

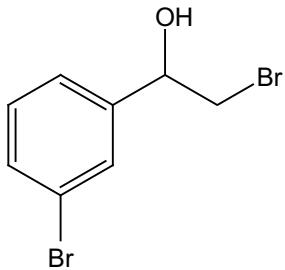

142.54

131.23

130.07

128.93

124.56

122.47

77.16 Chloroform-d

72.75

39.12

30 170 160 150 140 130 120 110 100 90 80 70 60 50 40 30 20 10 0

f1 (ppm)

59

17  
16  
15  
14  
13  
12  
11  
10  
9  
8  
7  
6  
5  
4  
3  
2  
1  
0  
-1
